# Supplementary material for: Synthesis of unsymmetrically substituted biaryls via sequential lithiation of dibromobiaryls using integrated microflow systems
Source: publisher site journal article supplement (doi:10.3762/bjoc.5.16), 2009-04-29
Supplement: Additional file 3 [file 1860-5397-5-16-S3.pdf]

**Synthesis of unsymmetrically substituted biaryls via sequential lithiation of  
dibromobiaryls using integrated microflow systems**

Aiichiro Nagaki, Naofumi Takabayashi, Yutaka Tomida, and Jun-ichi Yoshida\*

Address: Department of Synthetic Chemistry and Biological Chemistry, Graduate School of  
Engineering, Kyoto University, Kyotodaigakukatsura, Nishikyo-ku, Kyoto, 615-8510, Japan

Email: Jun-ichi Yoshida - yoshida@sbchem.kyoto-u.ac.jp

\* Corresponding author

**Supporting Information**

**$^1\text{H}$  NMR spectra and  $^{13}\text{C}$  NMR spectra of compounds  
41–42,46,48–52**



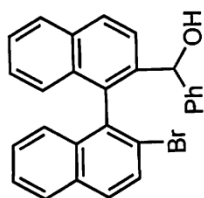

$^{13}\text{C}$  NMR spectrum of the major diastereomer of 2-bromo-2'-[hydroxyl(phenyl)methyl]-1,1'-binaphthyl (41)

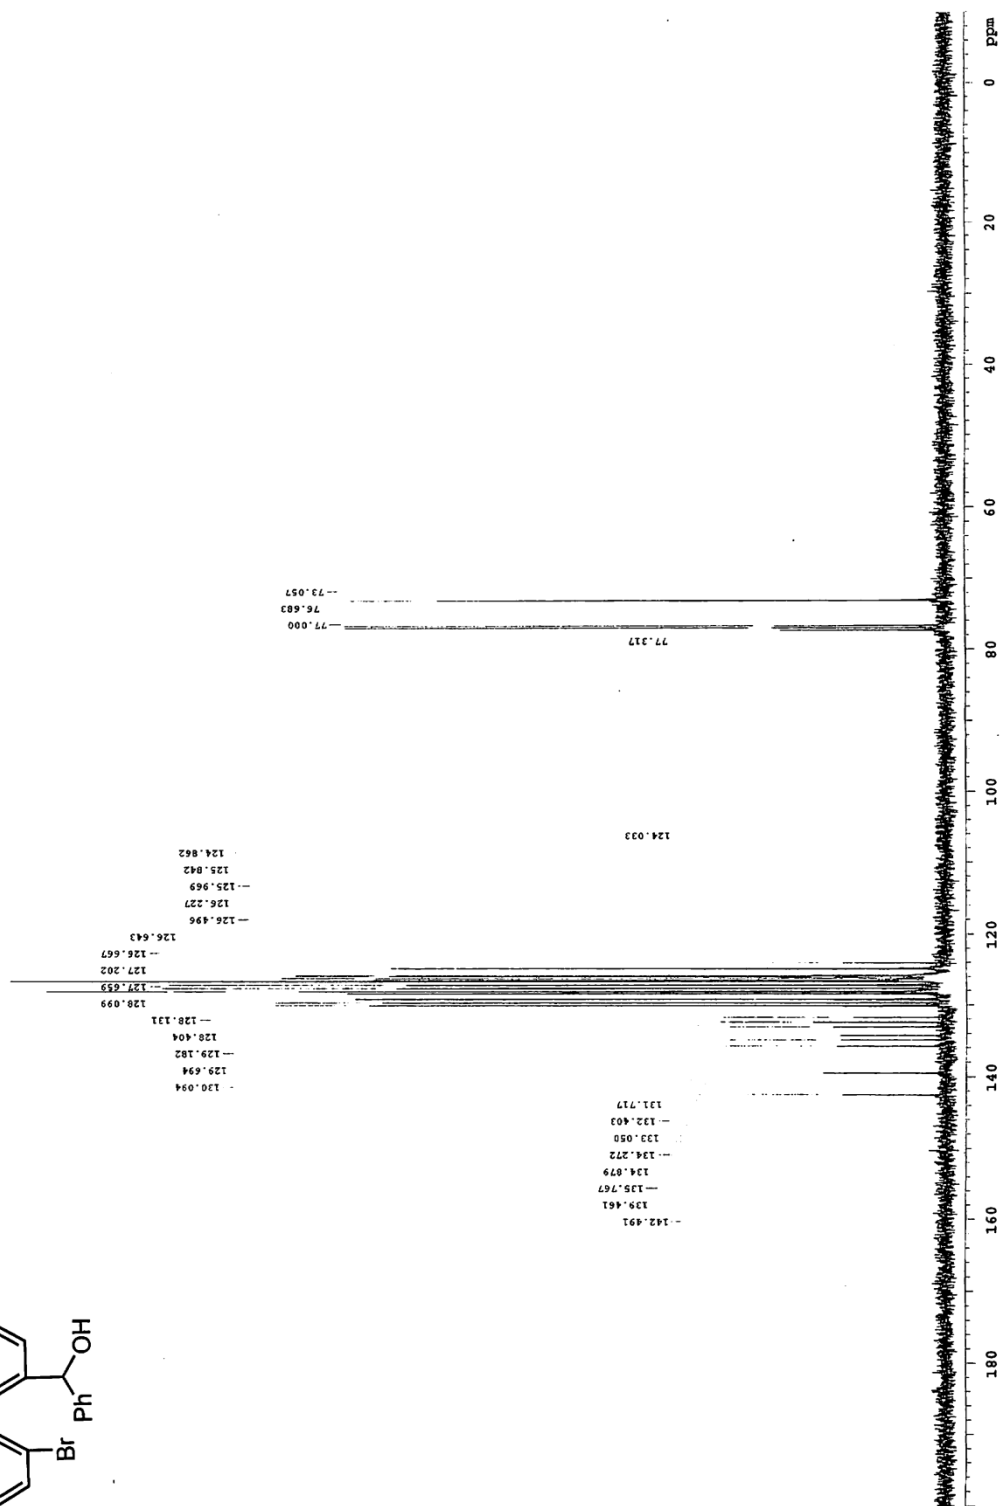

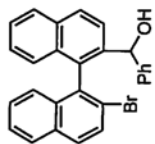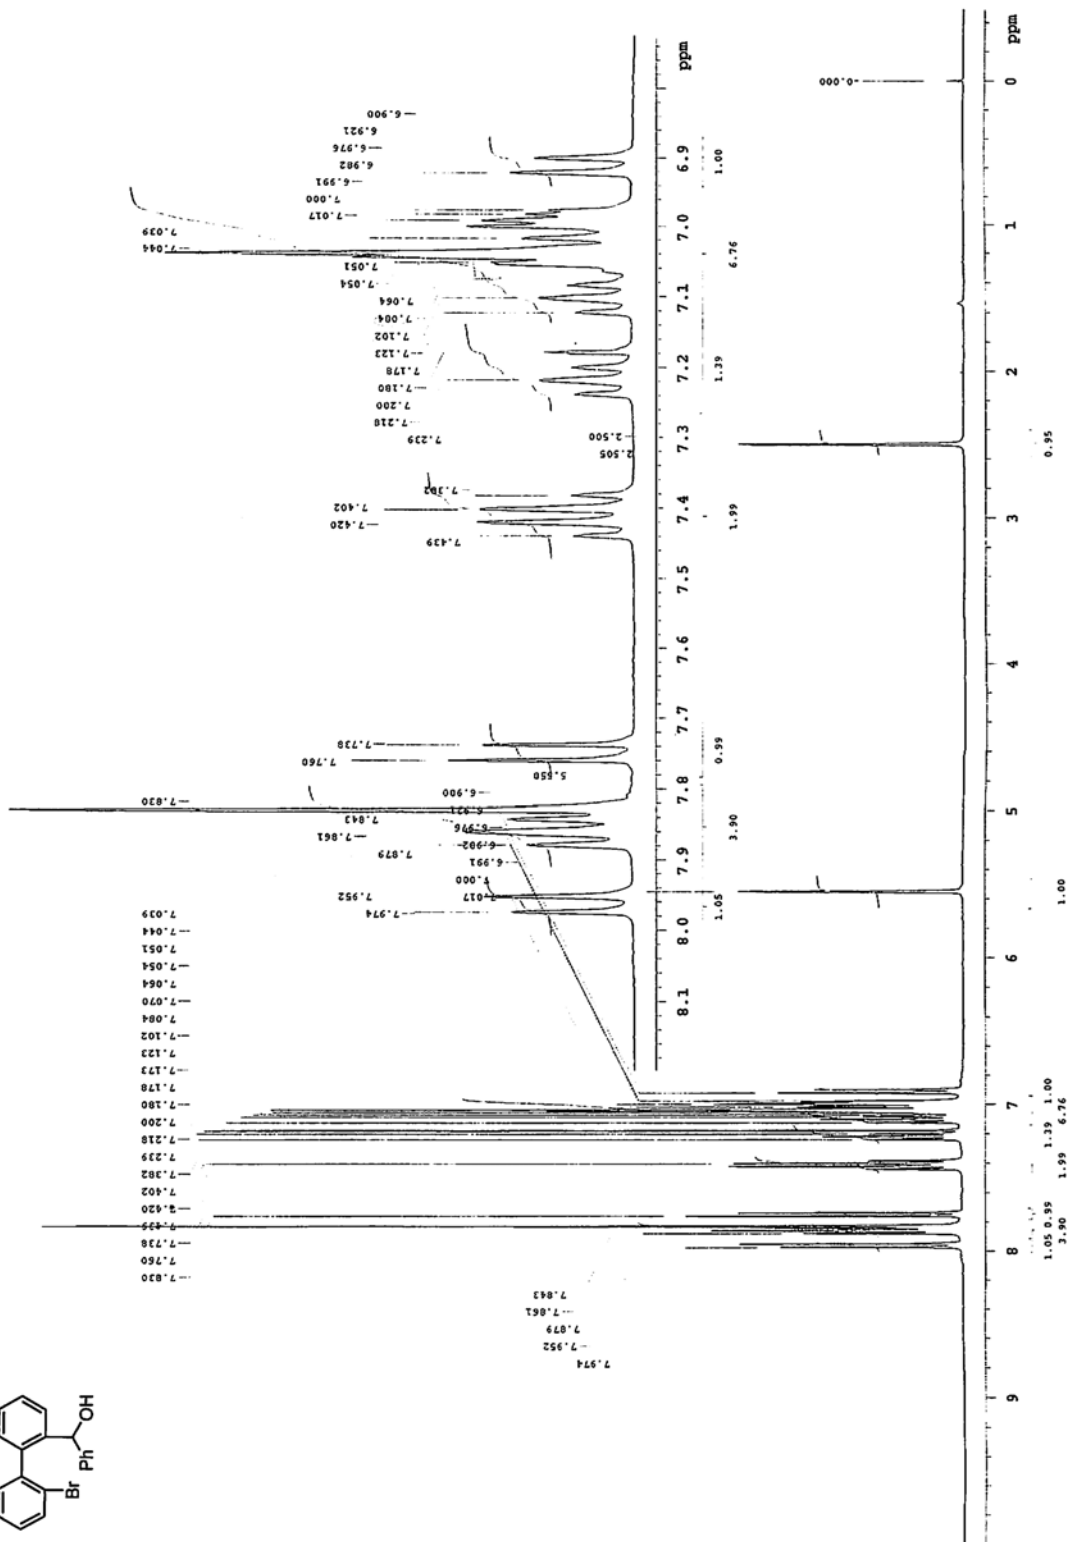

**$^1\text{H}$  NMR spectrum of the minor diastereomer of 2-bromo-2'-[hydroxyl(phenyl)methyl]-1,1'-binaphthyl (41)**

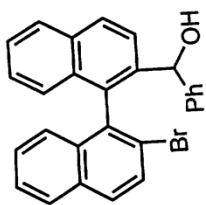

<sup>13</sup>C NMR spectrum of the minor diastereomer of  
2-bromo-2'-[hydroxyl(phenyl)methyl]-1,1'-binaphthyl (41)

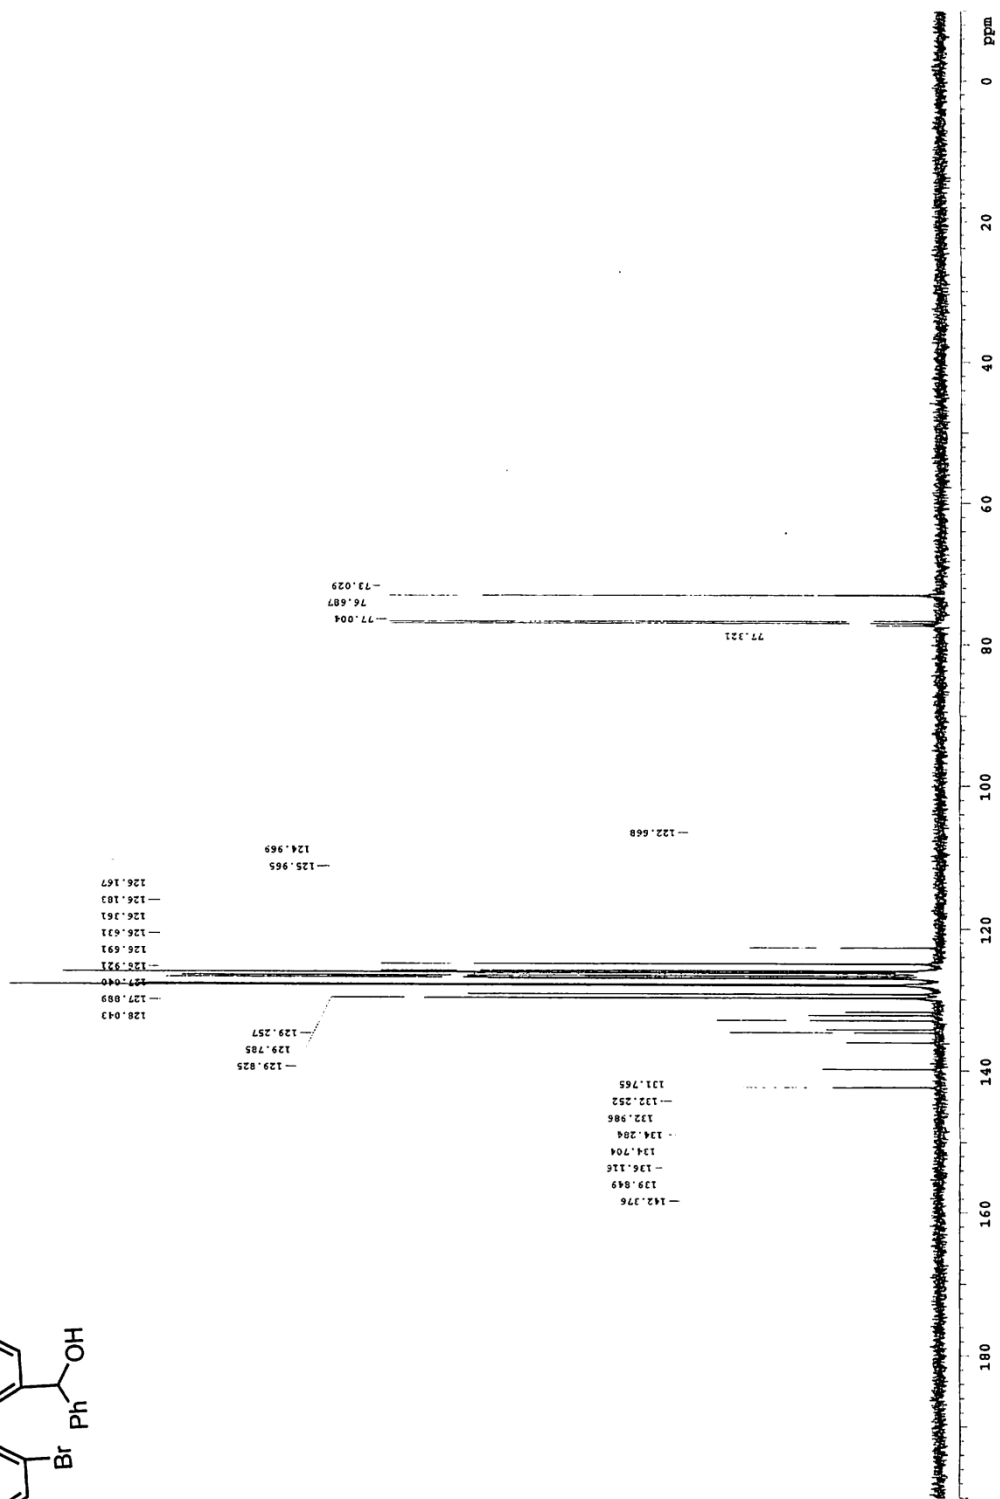

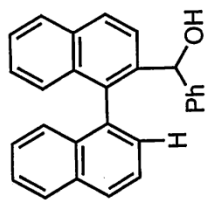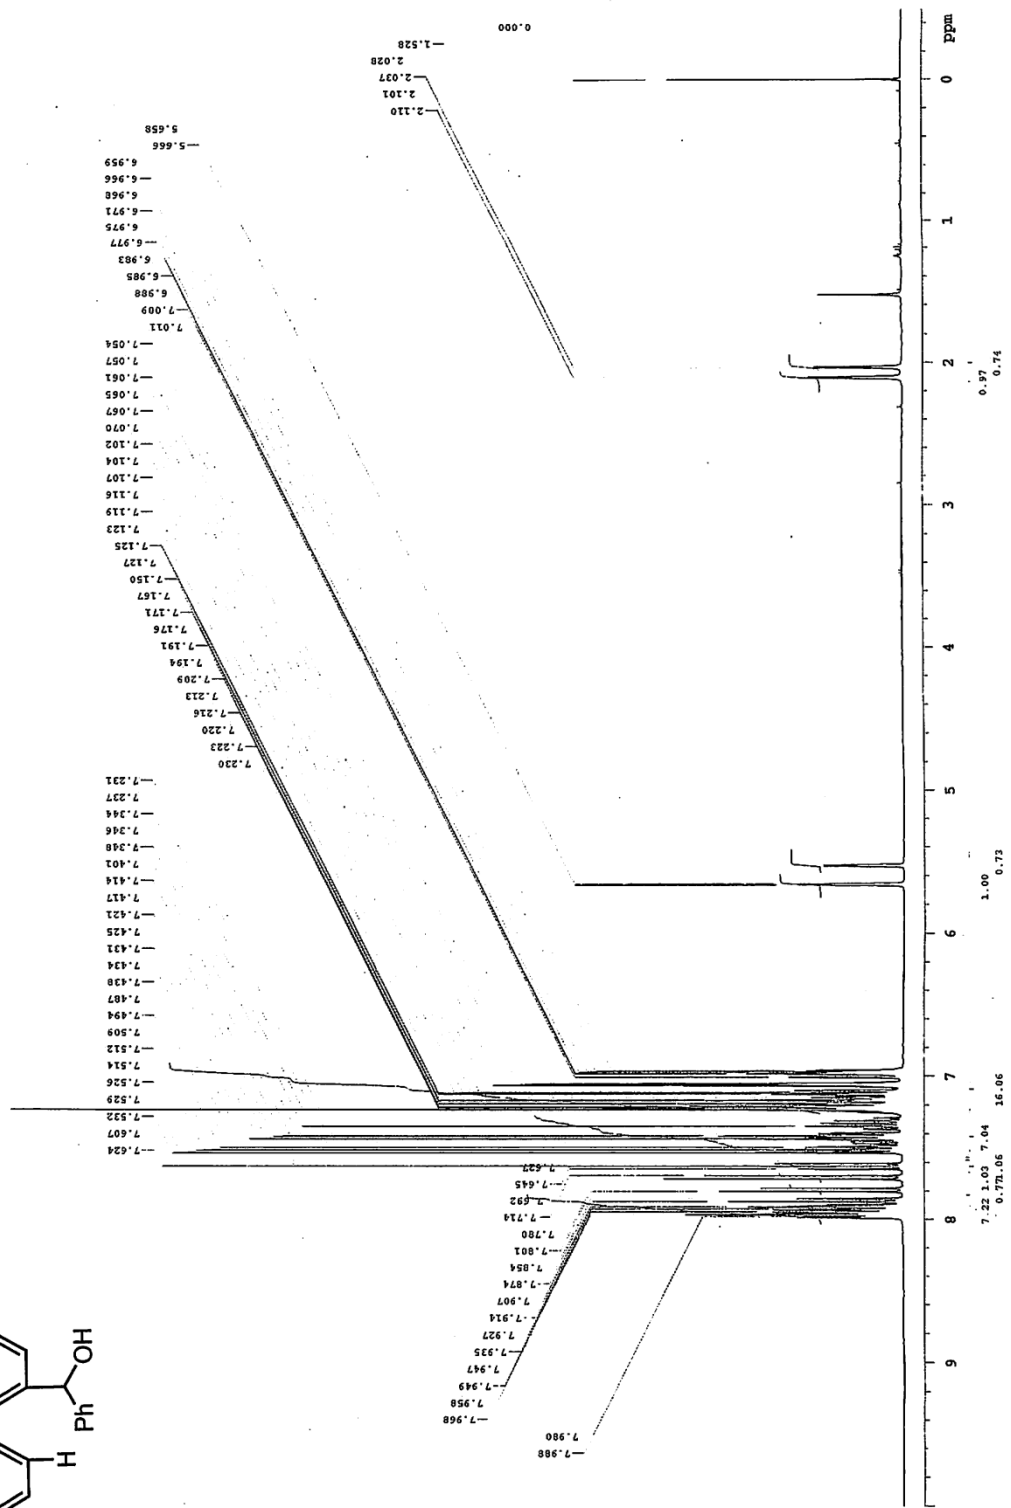

<sup>1</sup>H NMR spectrum of 2-[hydroxyl(phenyl)methyl]-1,1'-binaphthyl (42)

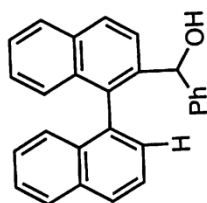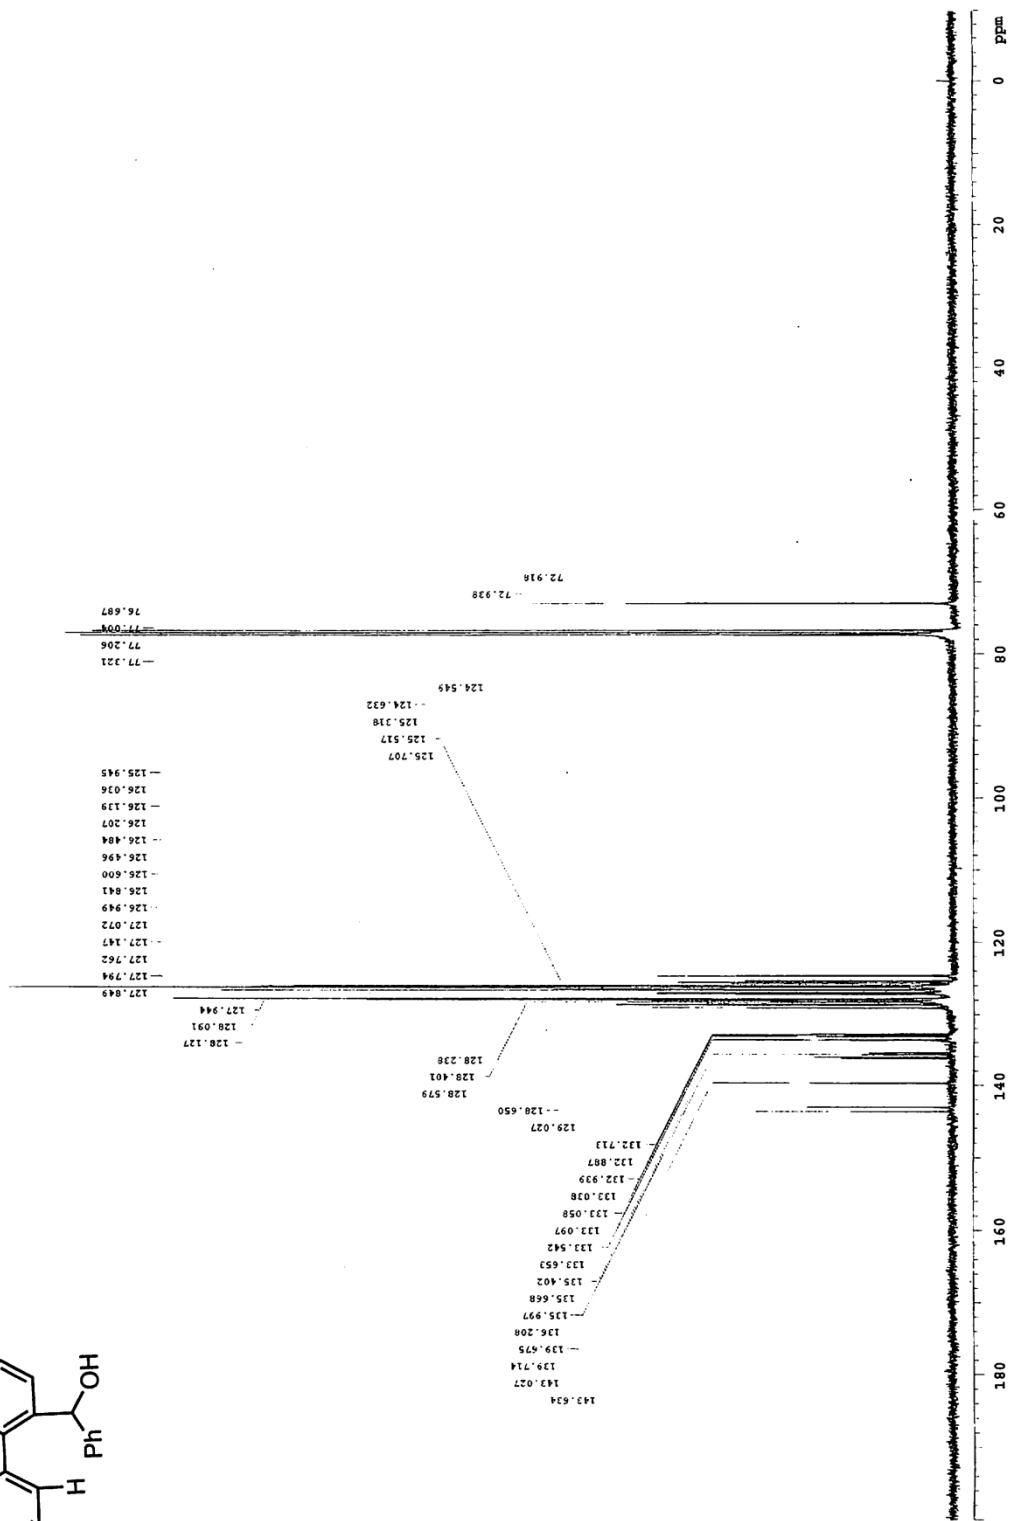

<sup>13</sup>C NMR spectrum of 2-[hydroxyl(phenyl)methyl]-1,1'-binaphthyl (42)

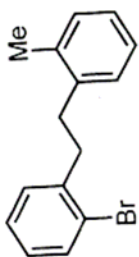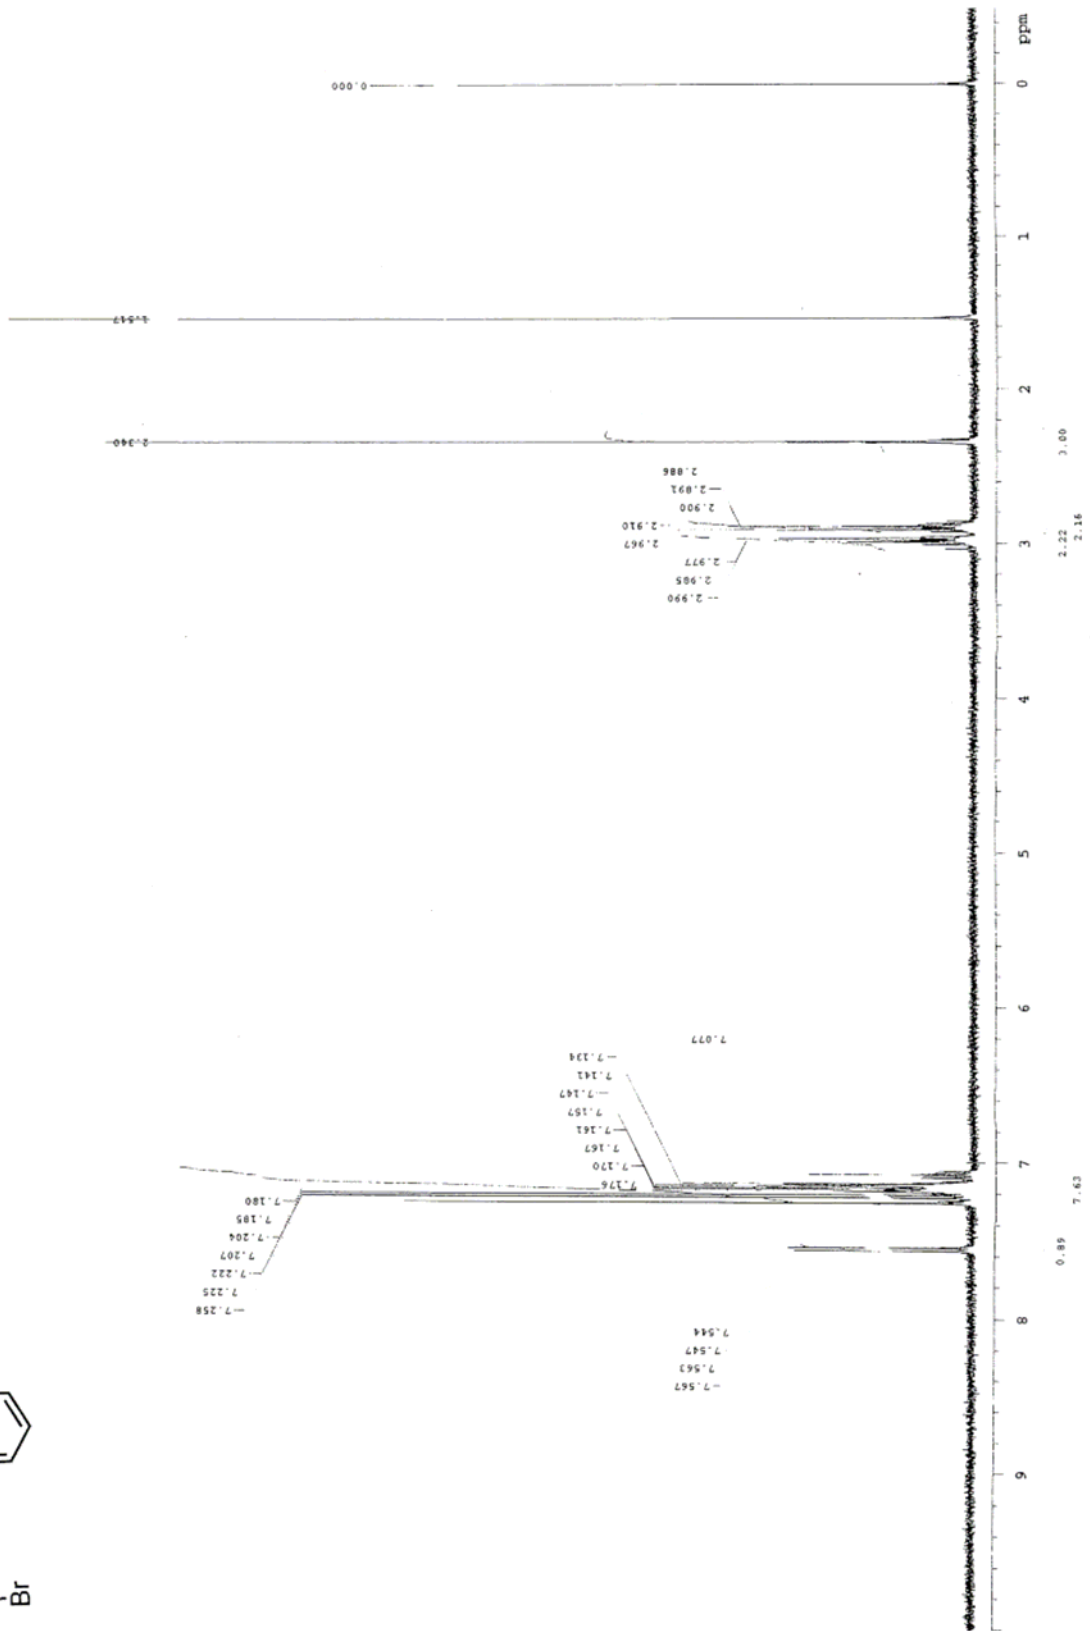

$^1\text{H}$  NMR spectrum of 2-bromo-2'-methylbiphenyl (46)



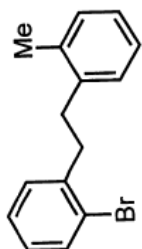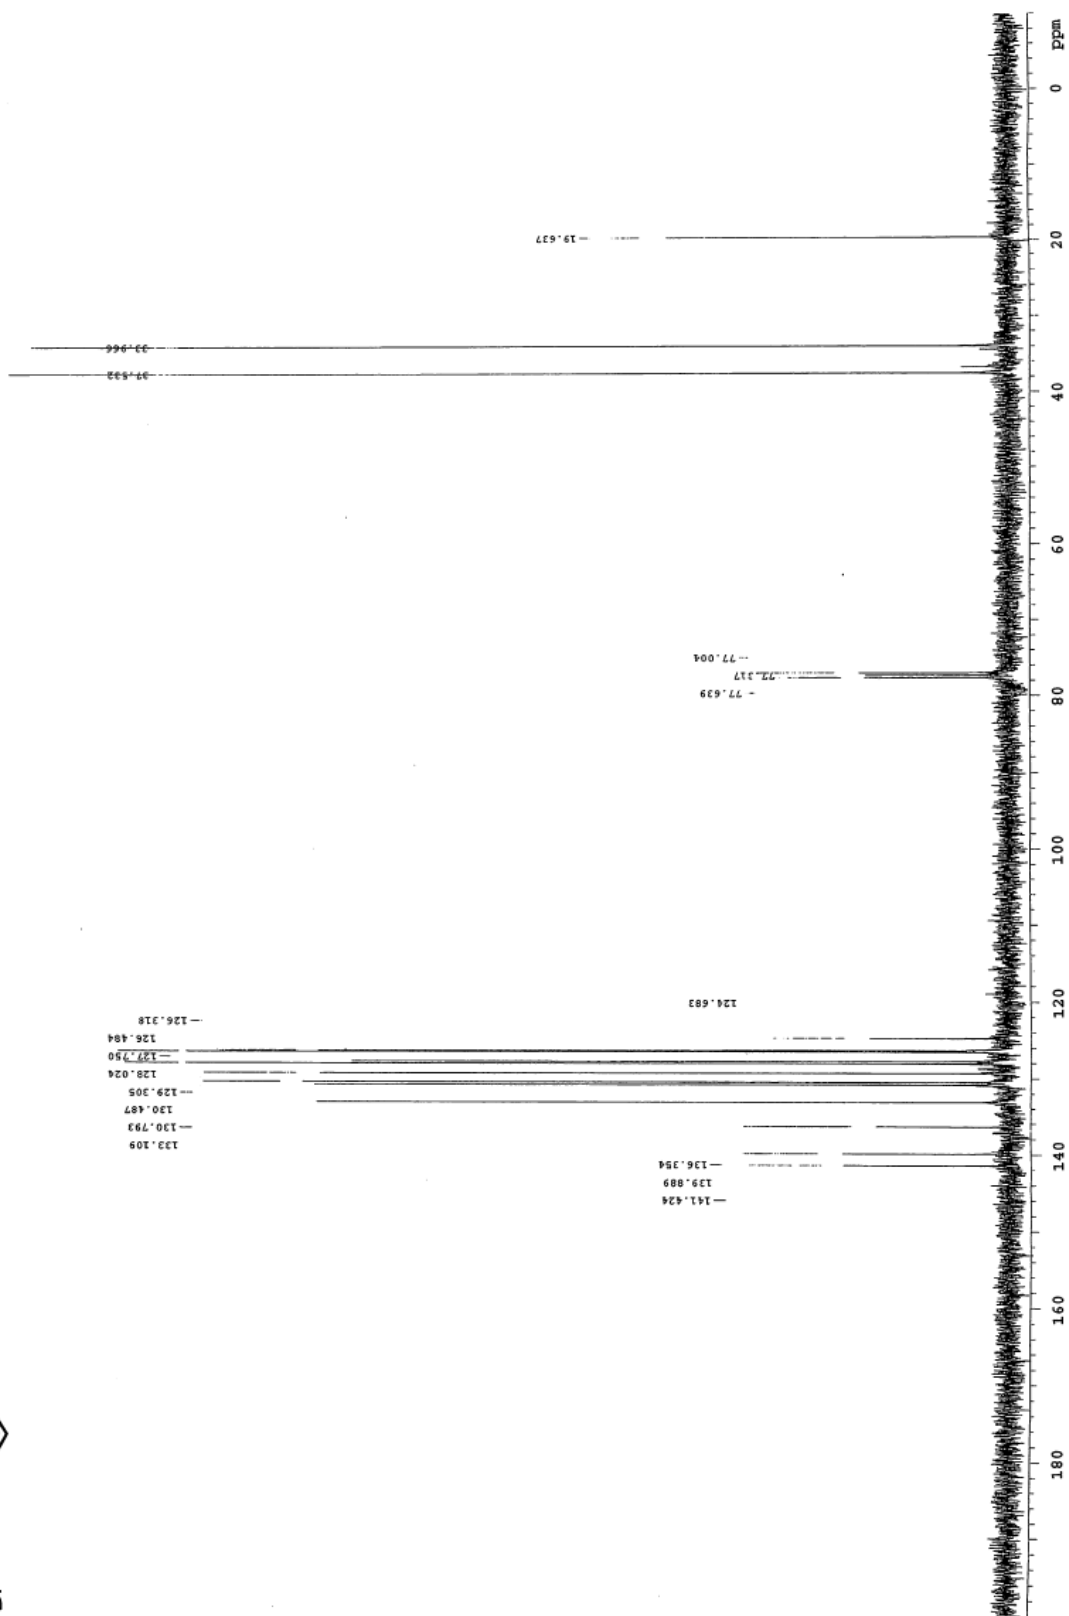

<sup>13</sup>C NMR spectrum of 2-bromo-2'-methylbibenzyl (46)

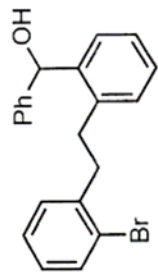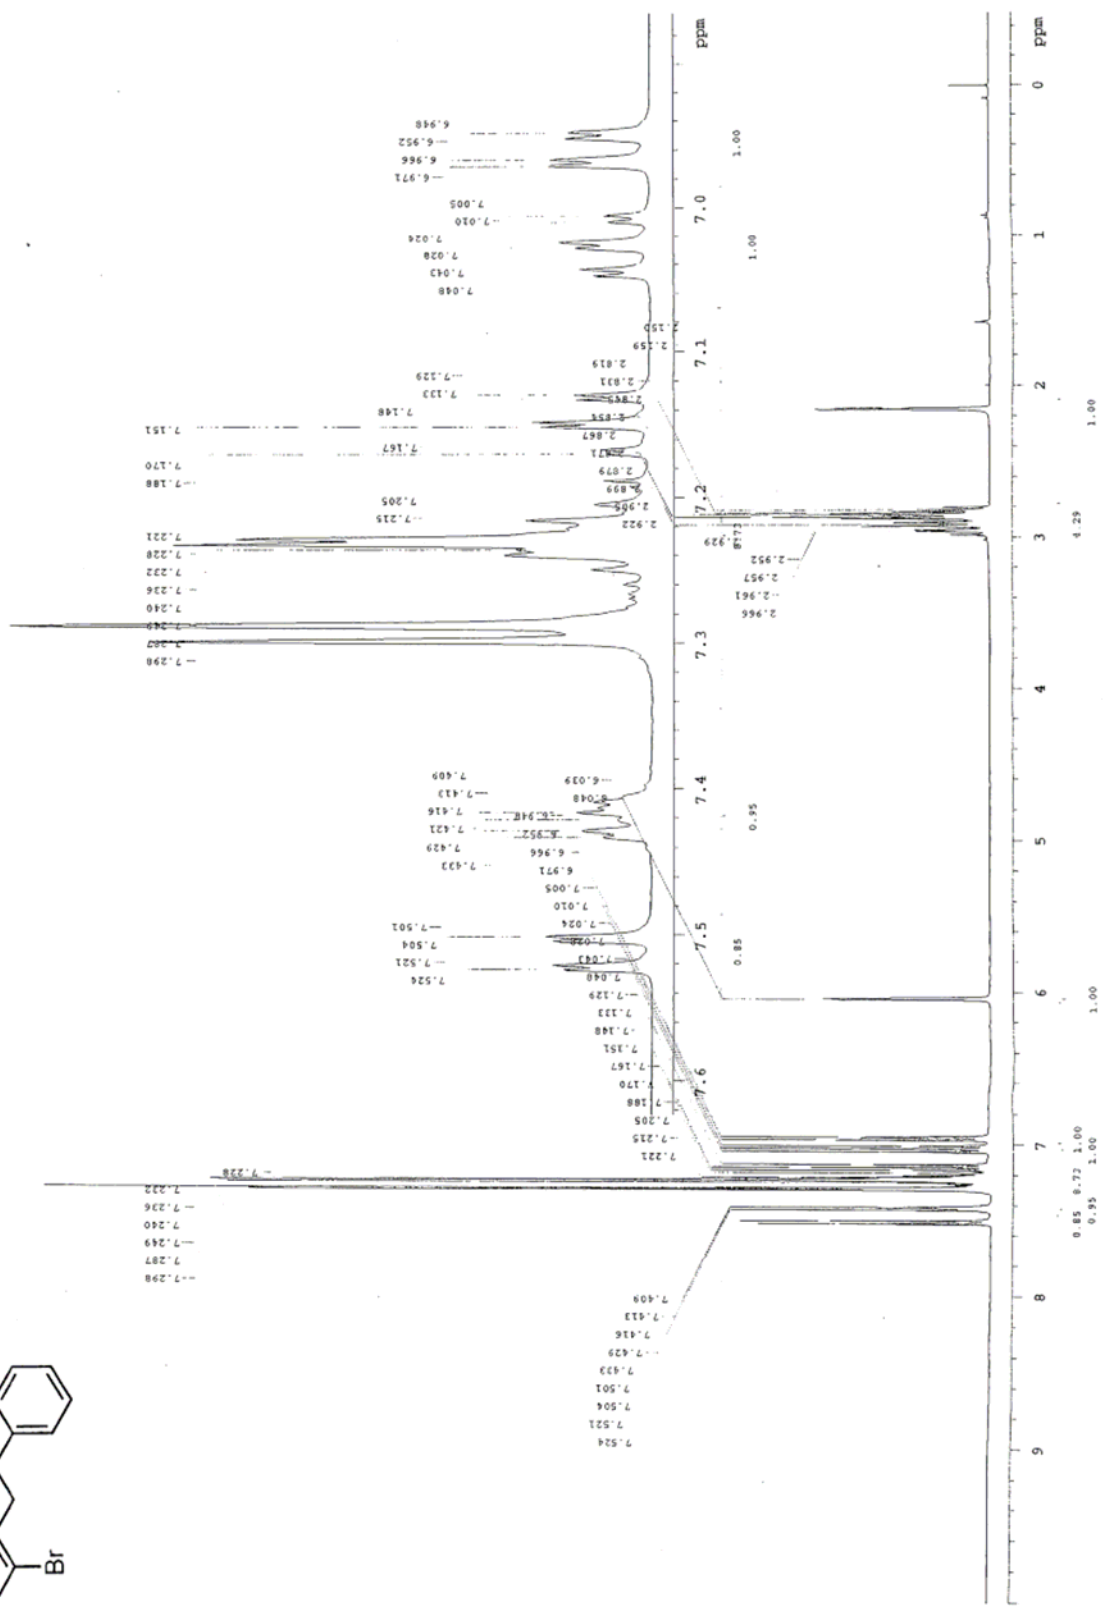

<sup>1</sup>H NMR spectrum of 2-bromo-2'-[hydroxyl(phenyl)methyl]biphenyl (48)

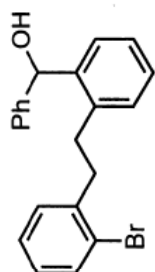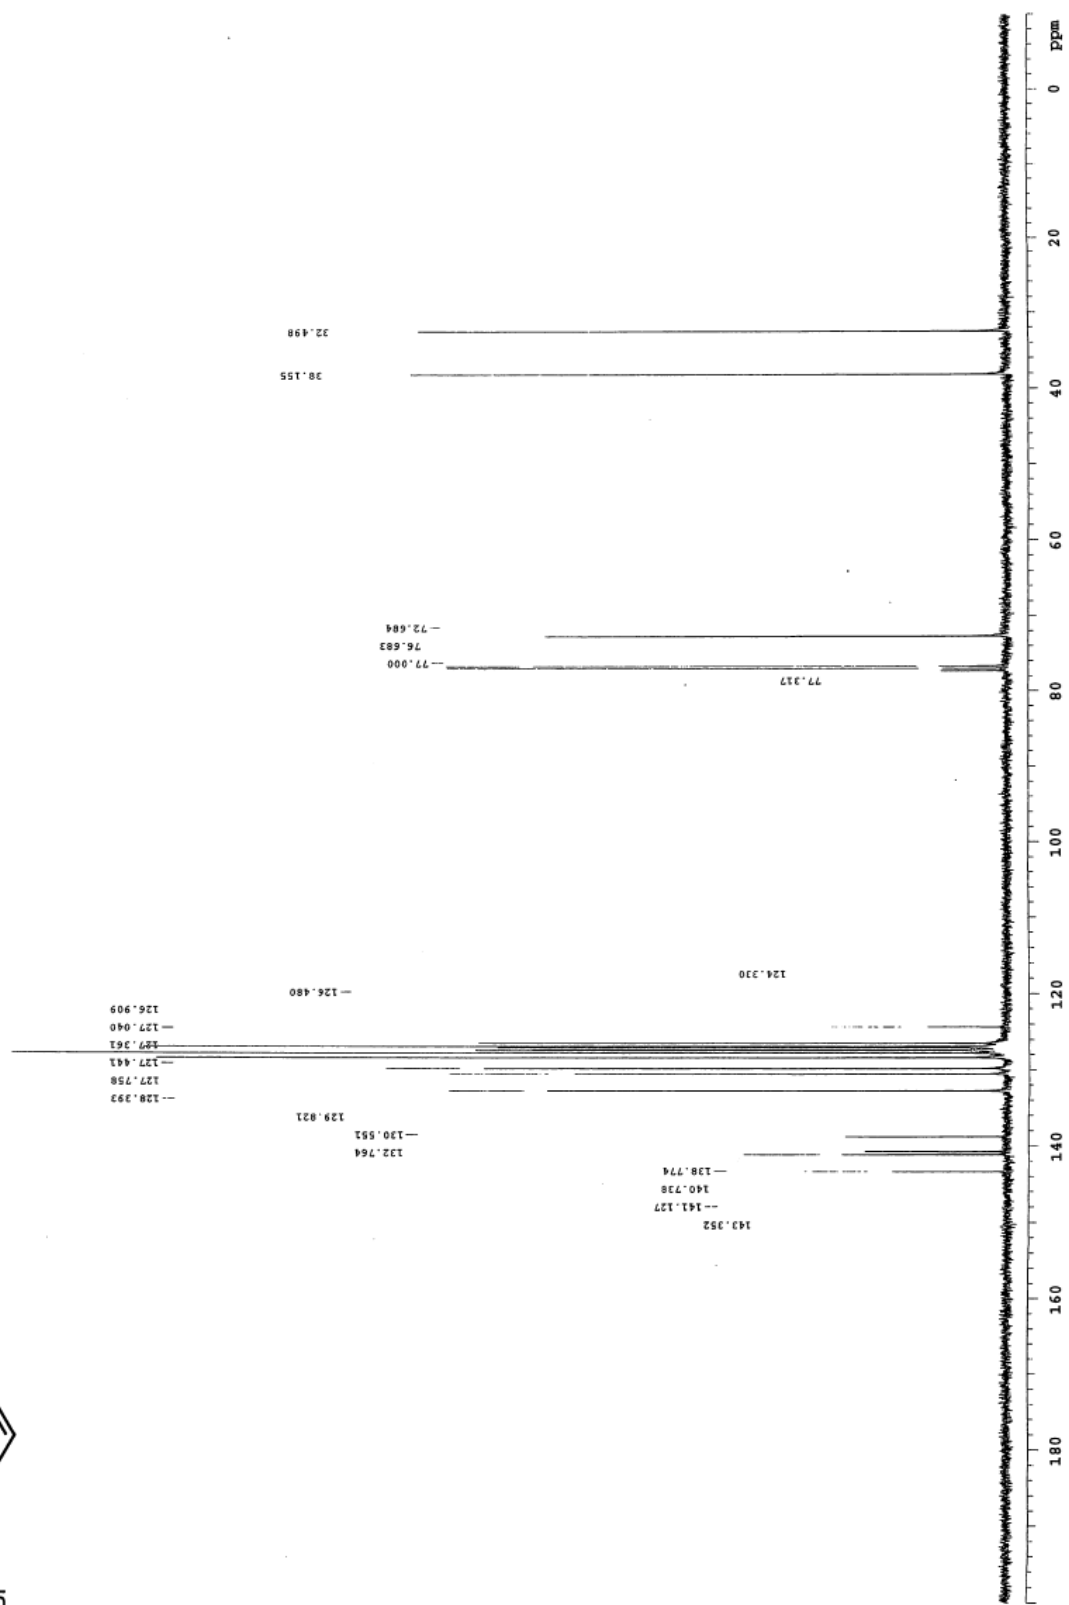

<sup>13</sup>C NMR spectrum of 2-bromo-2'-[hydroxyl(phenyl)methyl]bibenzyl (48)

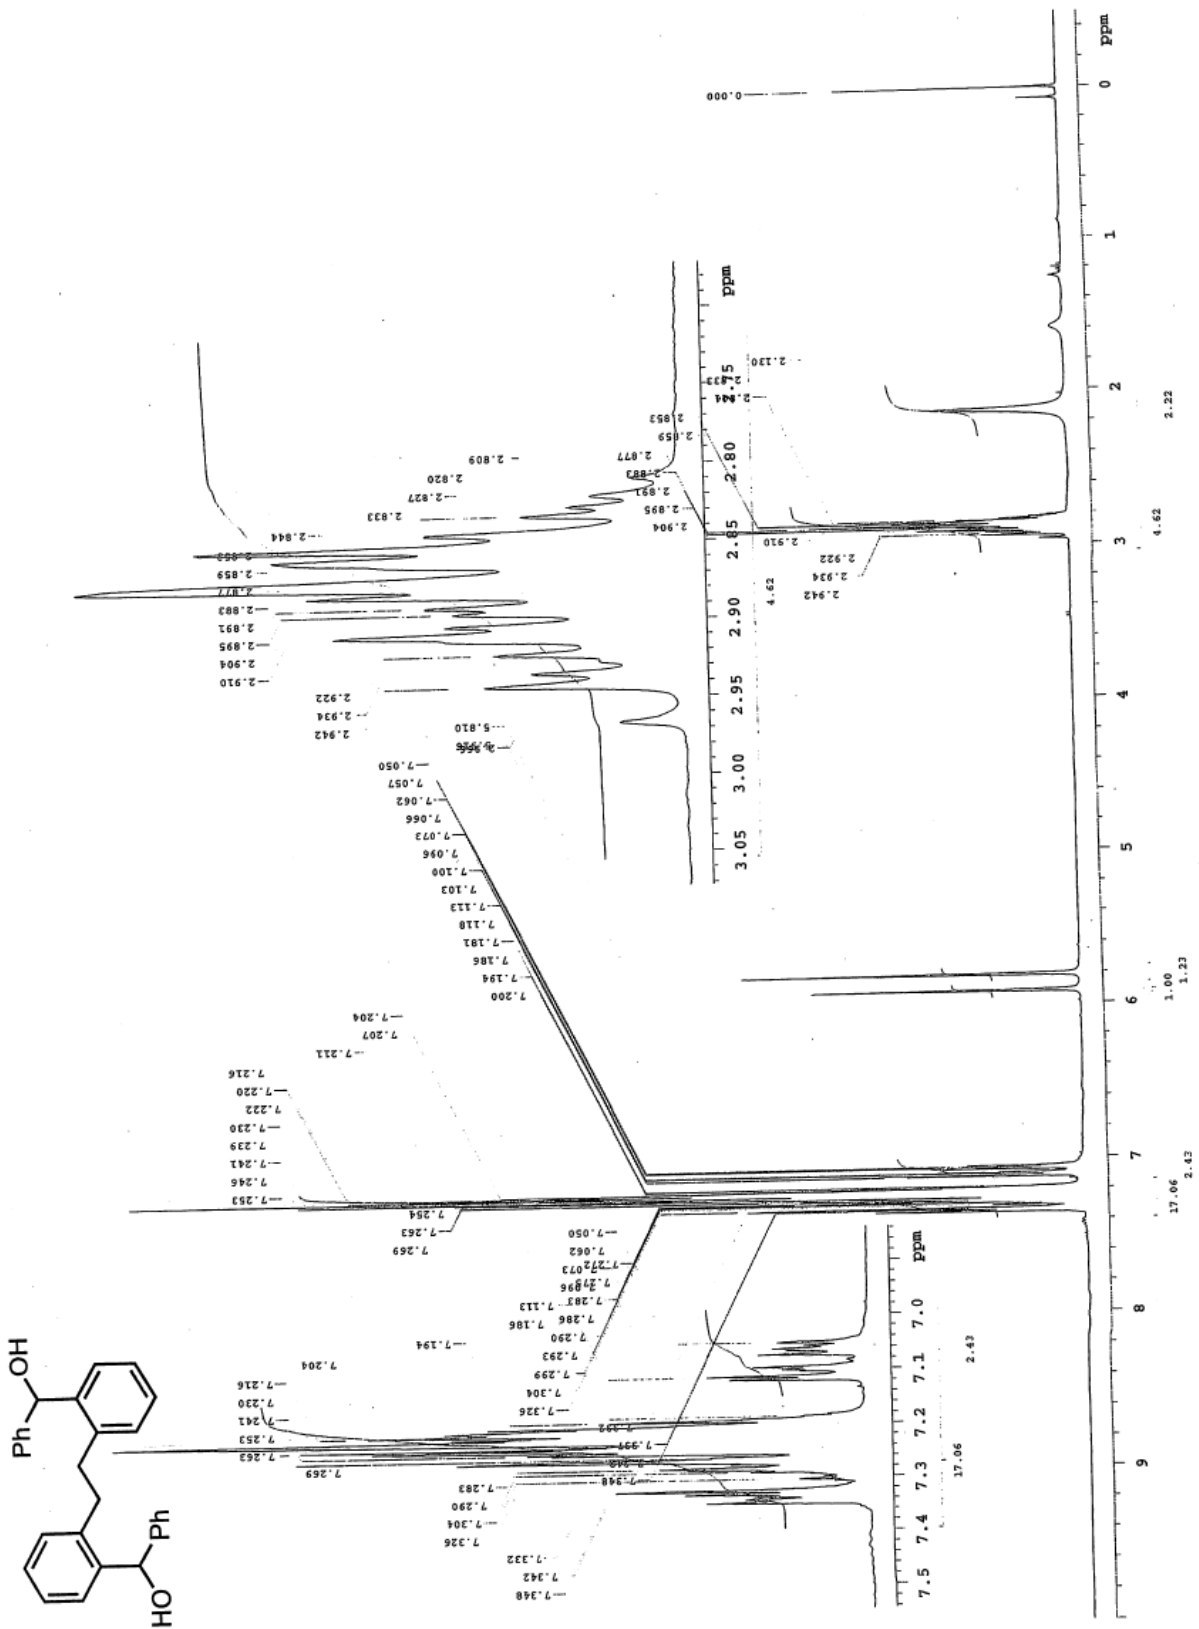

<sup>1</sup>H NMR spectrum of 2,2'-di[hydroxyl(phenyl)methyl]bibenzyl (49)

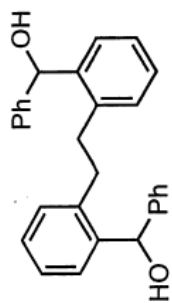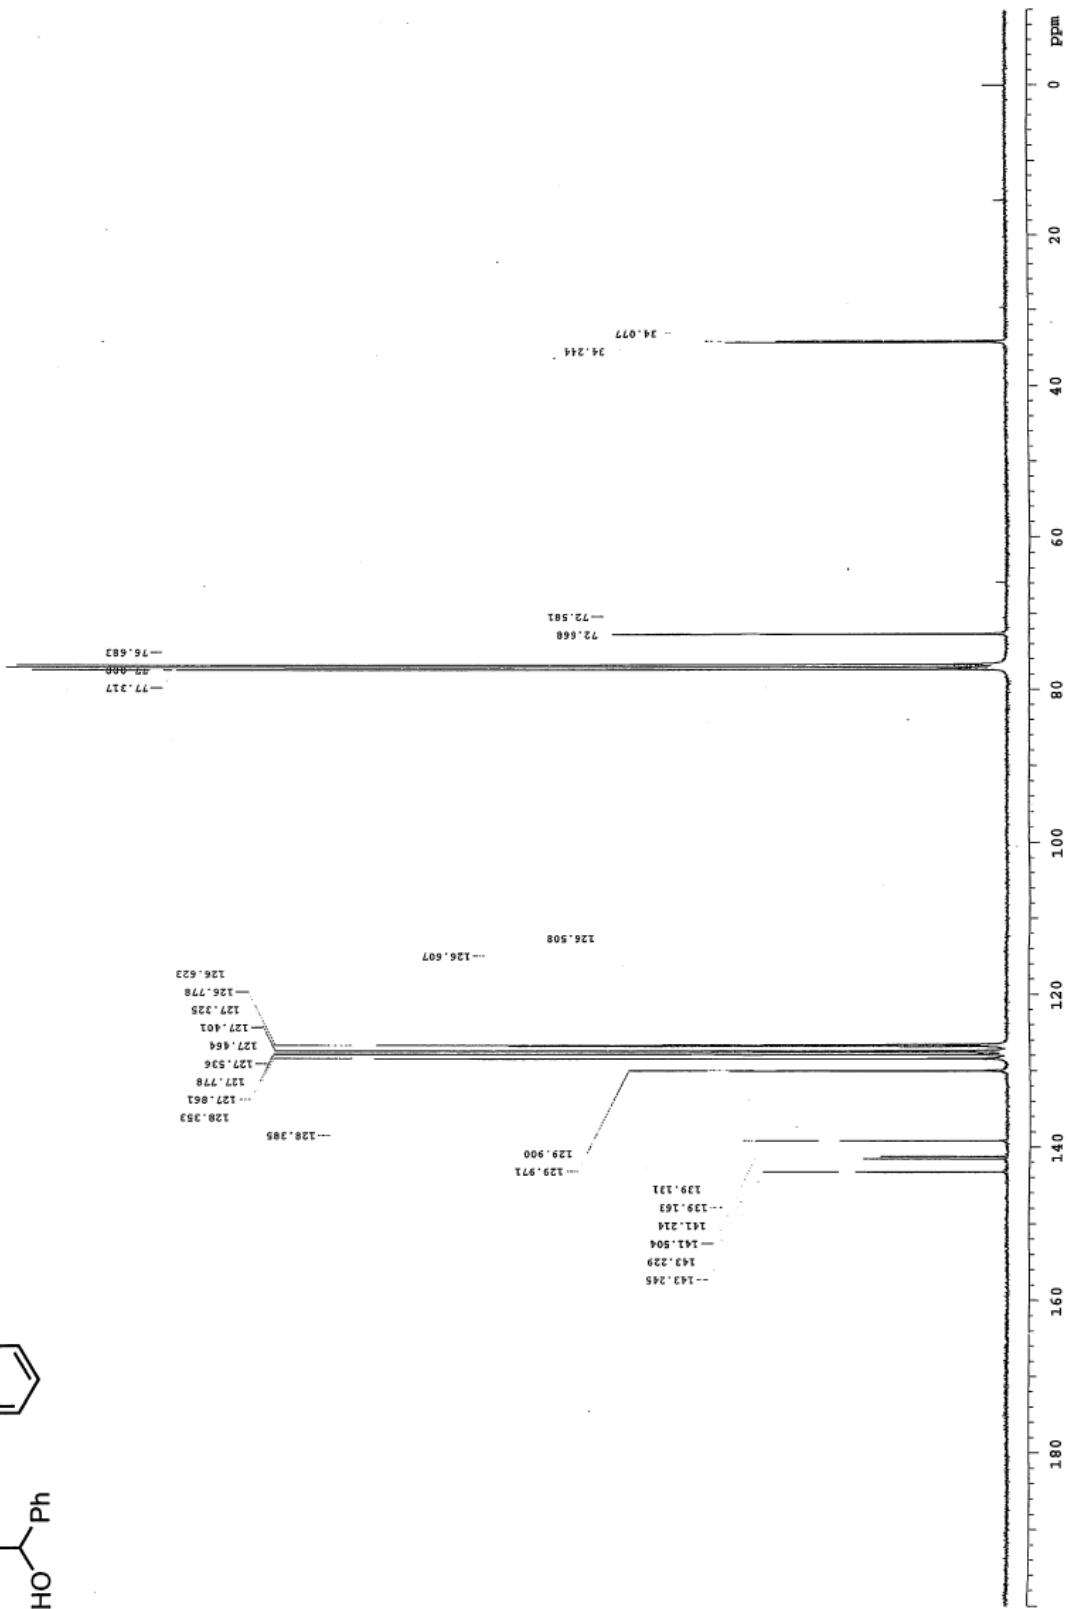

<sup>13</sup>C NMR spectrum of 2,2'-di[hydroxyl(phenyl)methyl]bibenzyl (49)

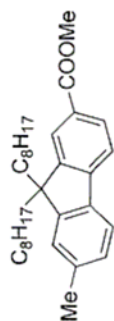

<sup>1</sup>H NMR spectrum of 2-methyl-7-methoxycarbonyl-9,9-dioctylfluorene (50)

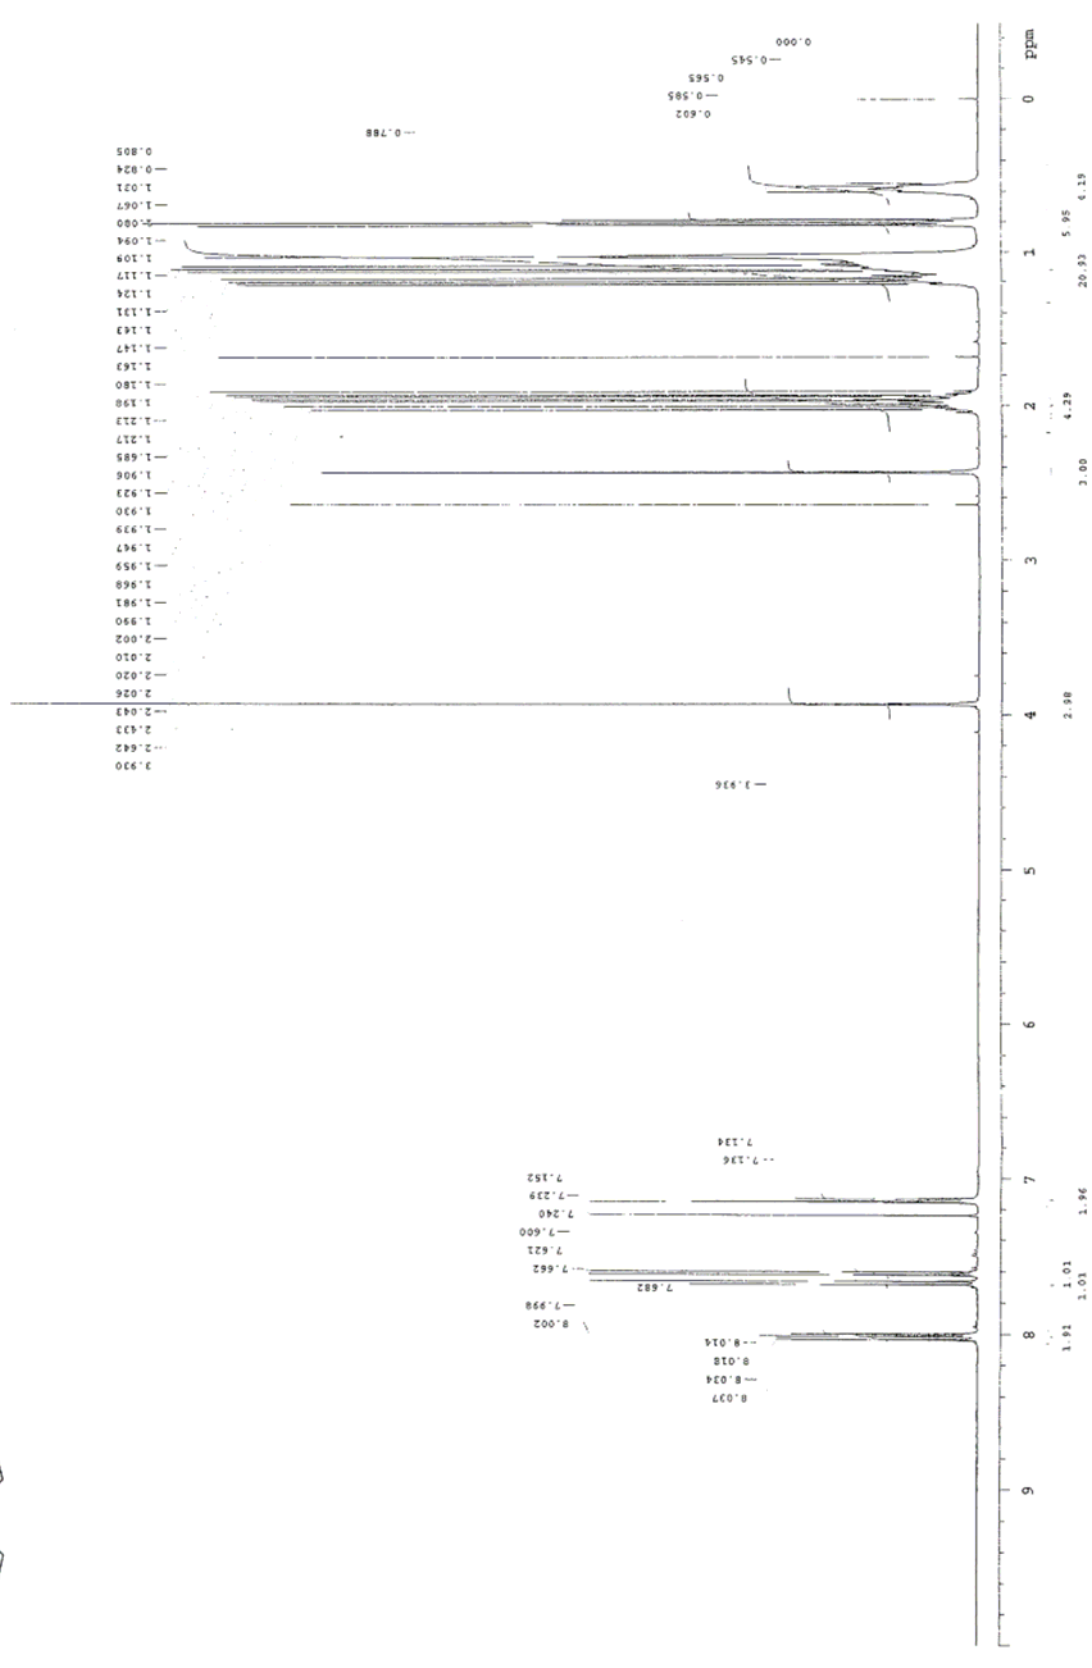

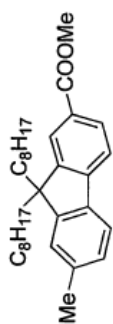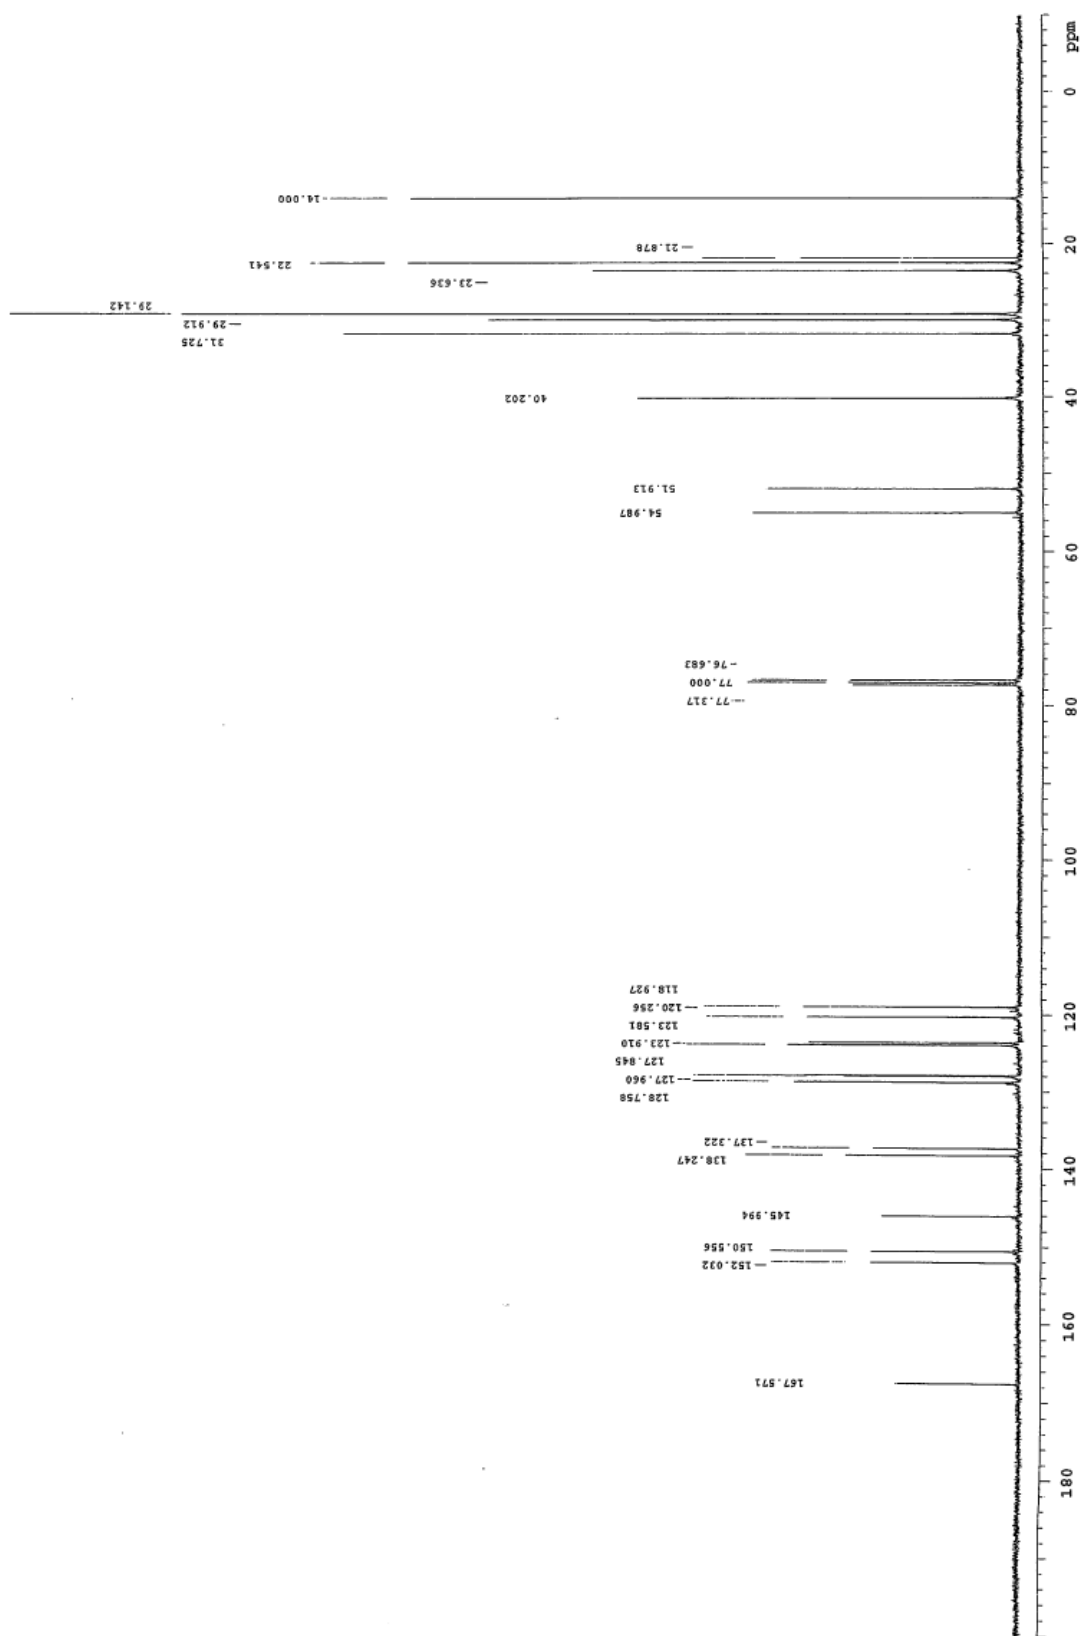

<sup>13</sup>C NMR spectrum of 2-methyl-7-methoxycarbonyl-9,9-dioctylfluorene (50)

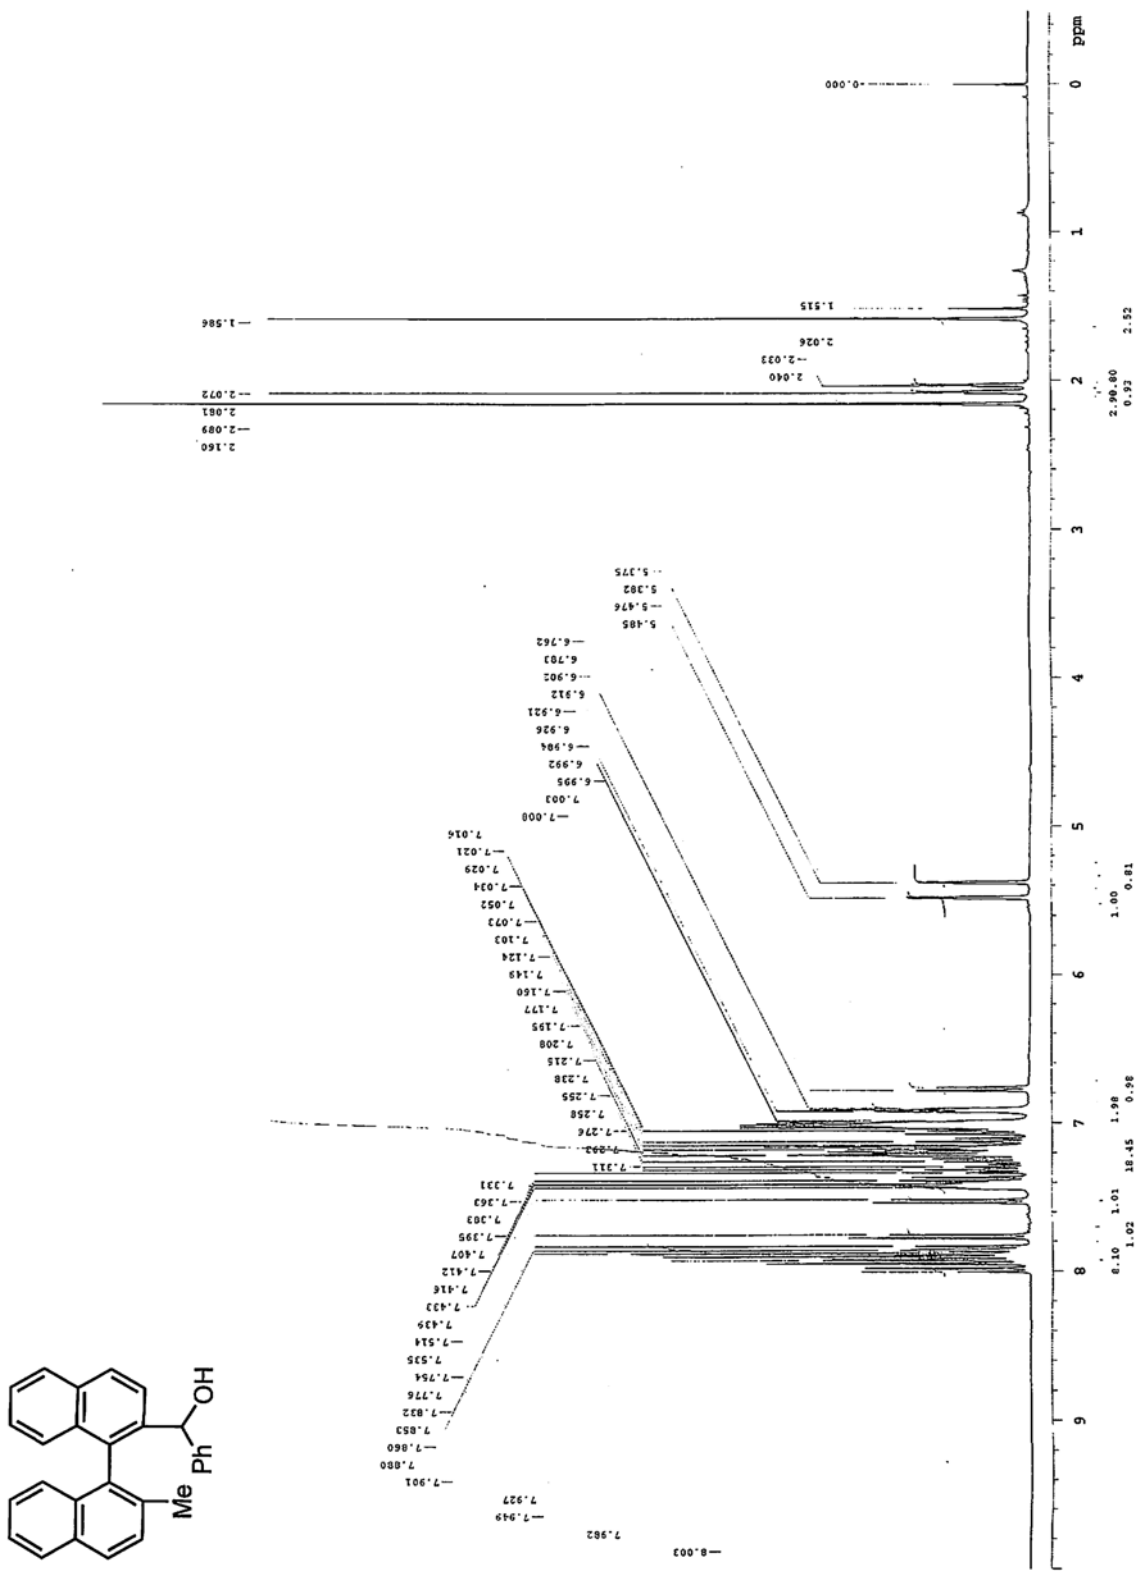

**<sup>1</sup>H NMR spectrum of 2-methyl-2'-[hydroxyl(phenyl)methyl]binaphthyl (51)  
(diastereomer ratio = 56/44)**



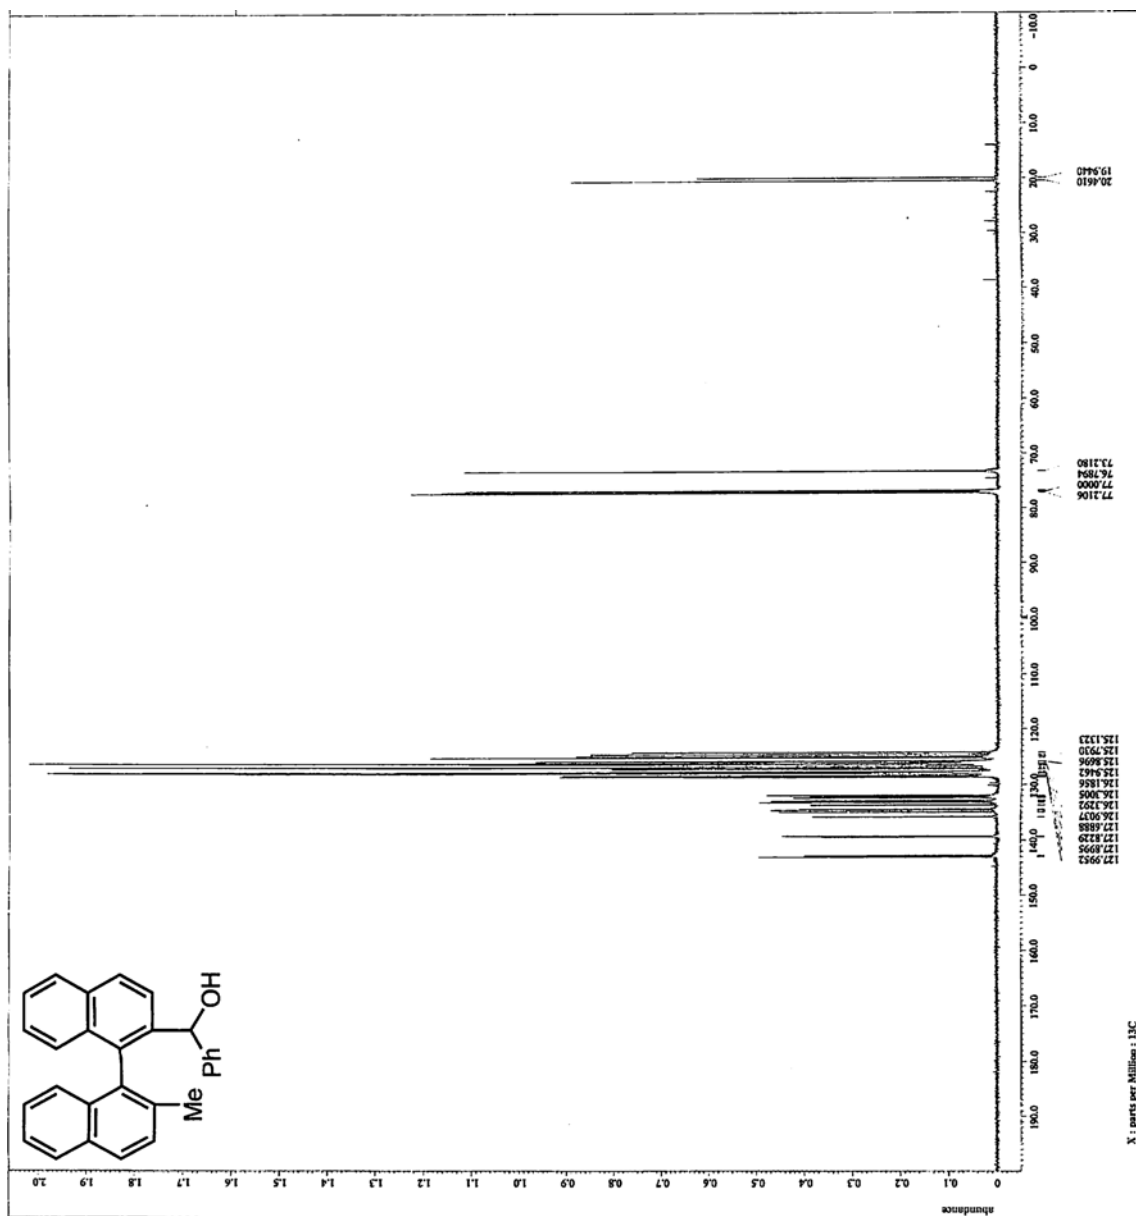

$^{13}\text{C}$  NMR spectrum of 2-methyl-2'-[hydroxyl(phenyl)methyl]binaphthyl (51)  
(diastereomer ratio = 56/44)



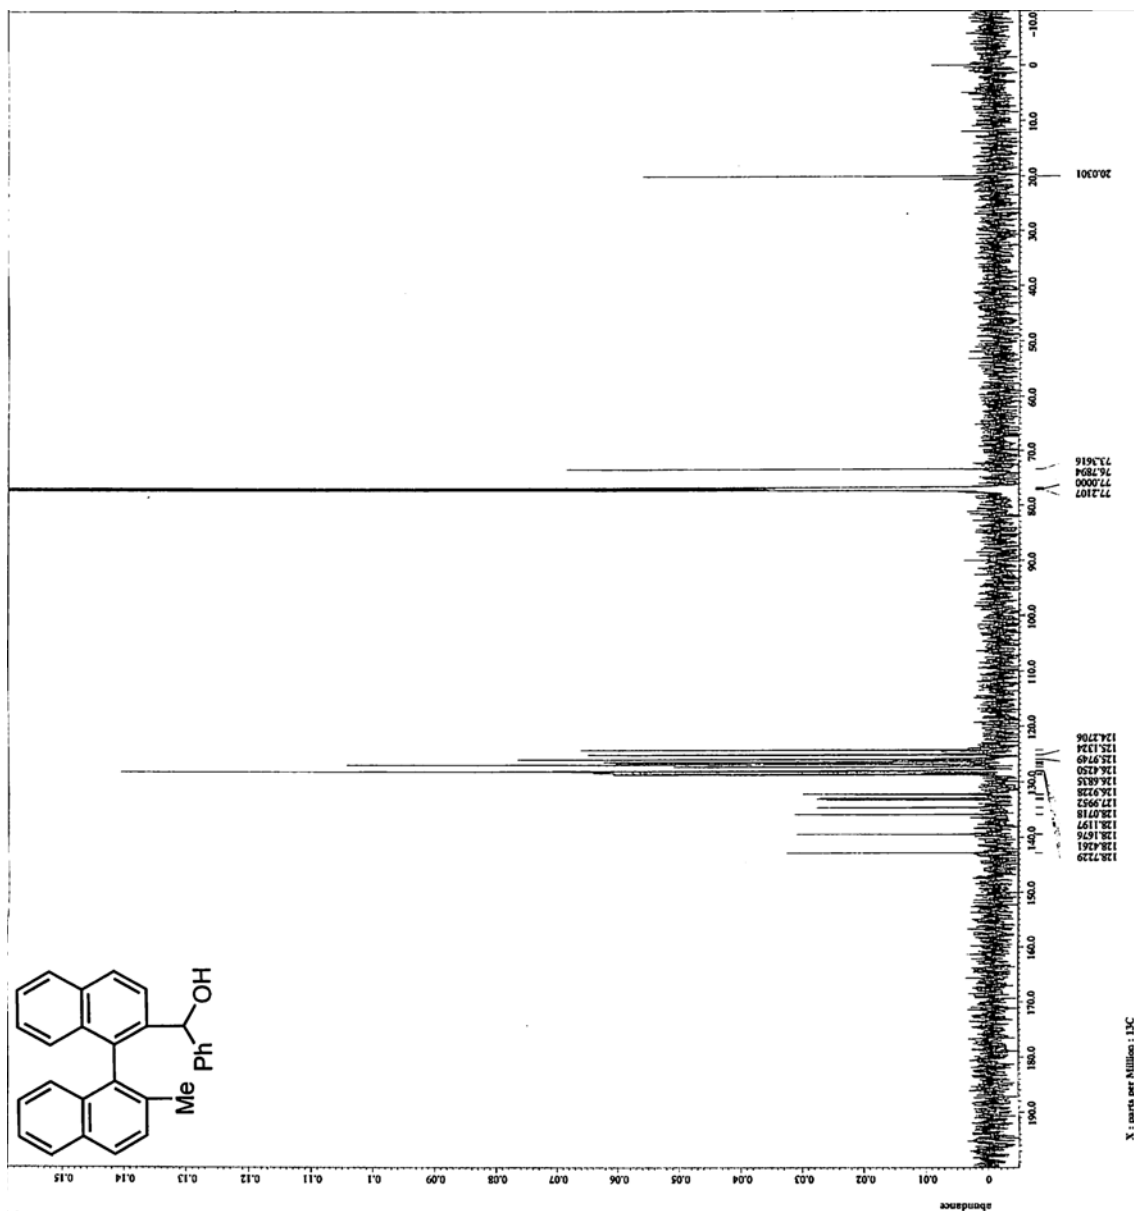

$^{13}\text{C}$  NMR spectrum of 2-methyl-2'-[hydroxyl(phenyl)methyl]binaphthyl (51)  
(diastereomer ratio = 88/12)

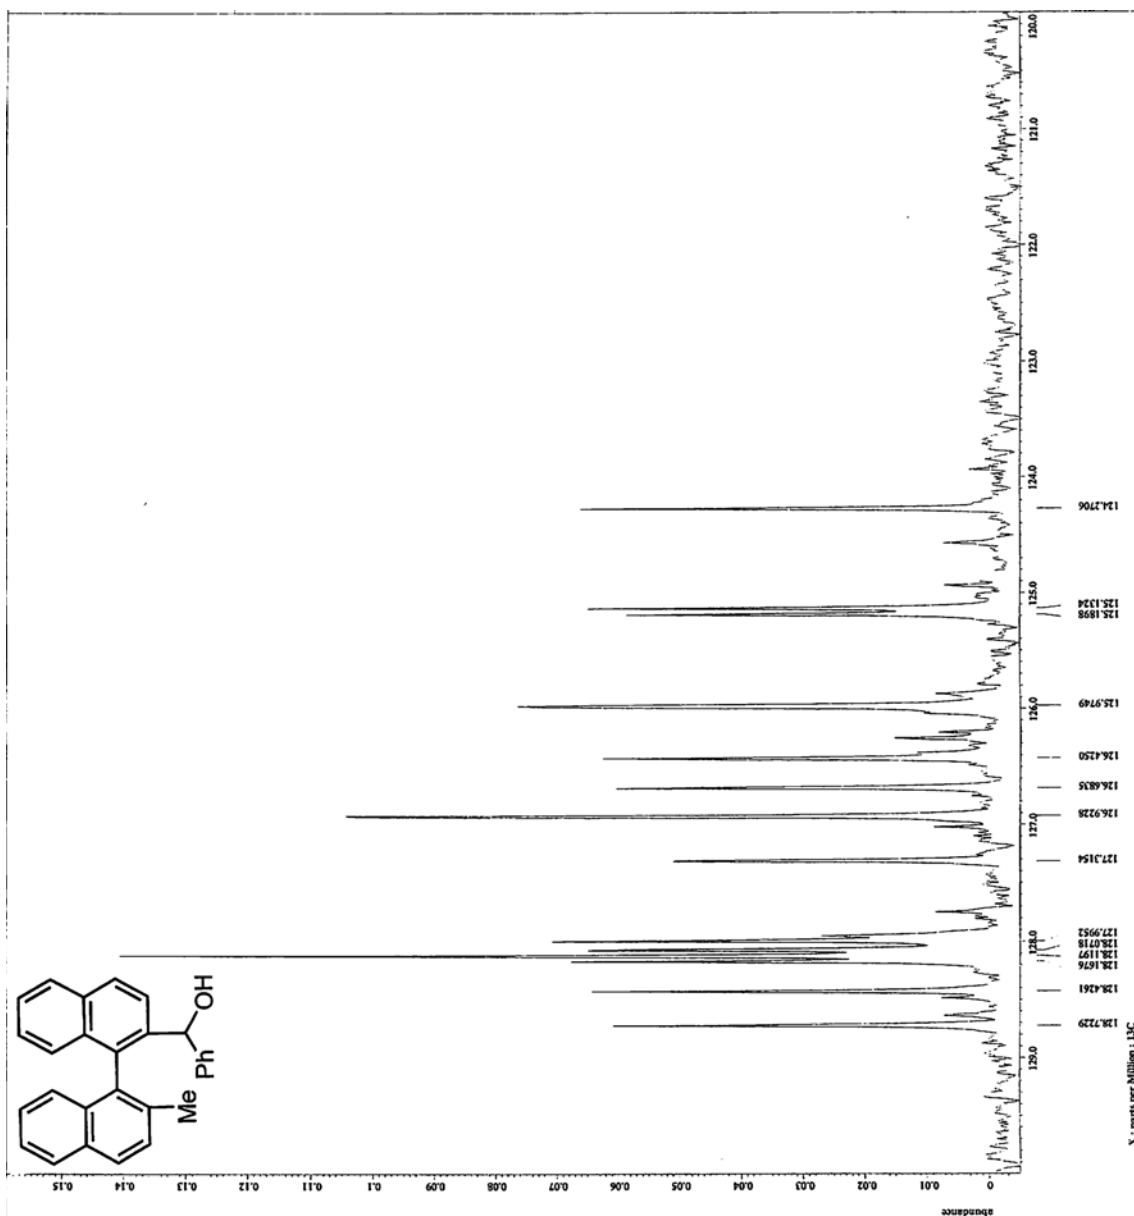

$^{13}\text{C}$  NMR spectrum of 2-methyl-2'-[hydroxyl(phenyl)methyl]binaphthyl (51)  
(diastereomer ratio = 88/12)

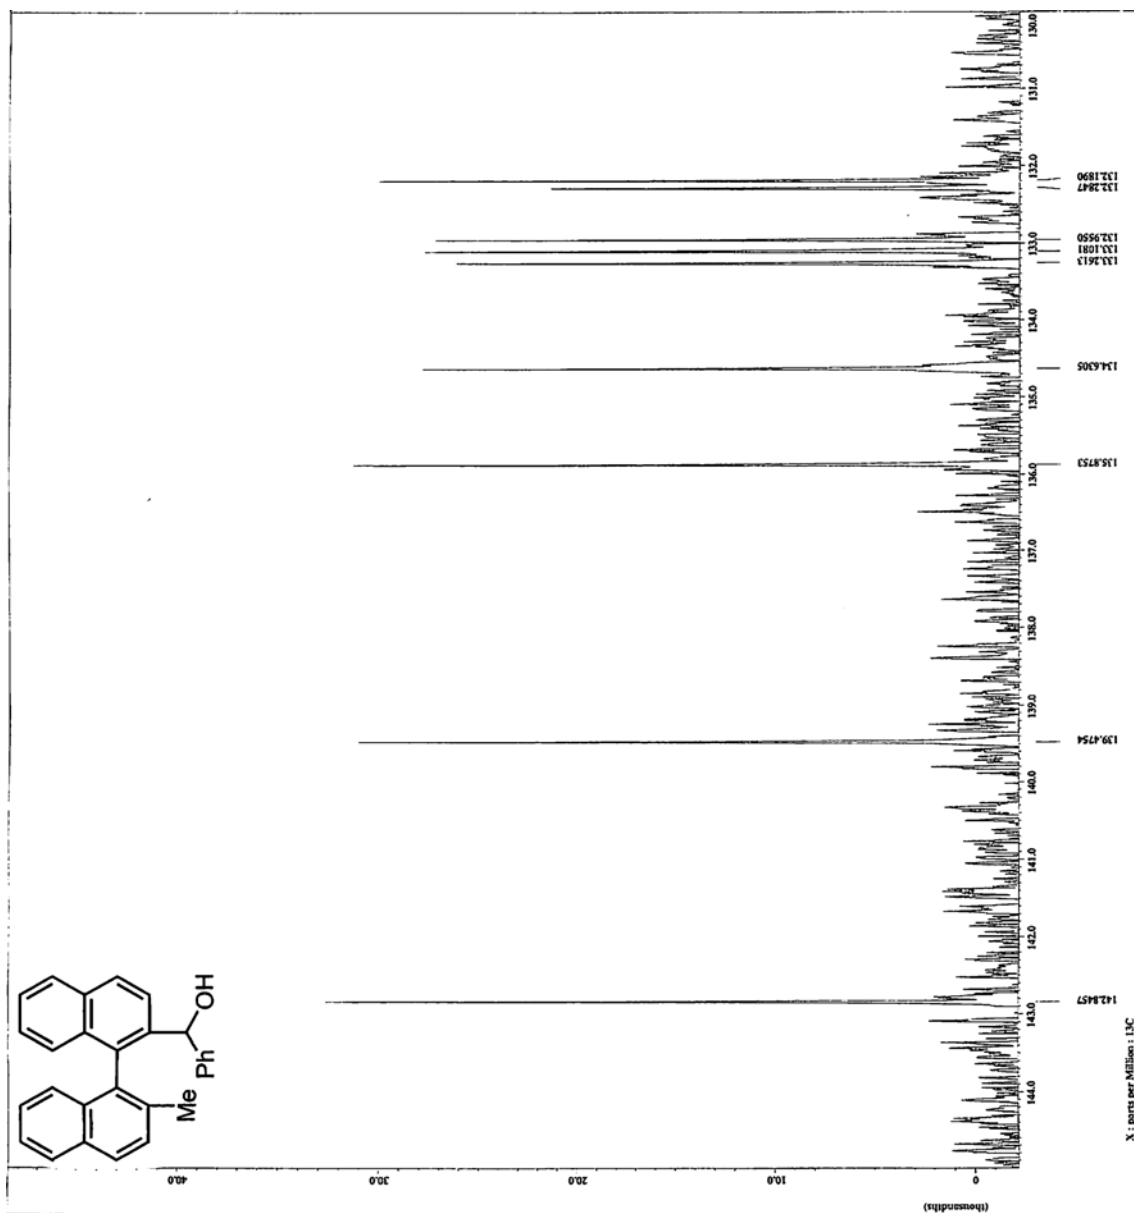

<sup>13</sup>C NMR spectrum of 2-methyl-2'-[hydroxyl(phenyl)methyl]binaphthyl (51)  
(diastereomer ratio = 88/12)



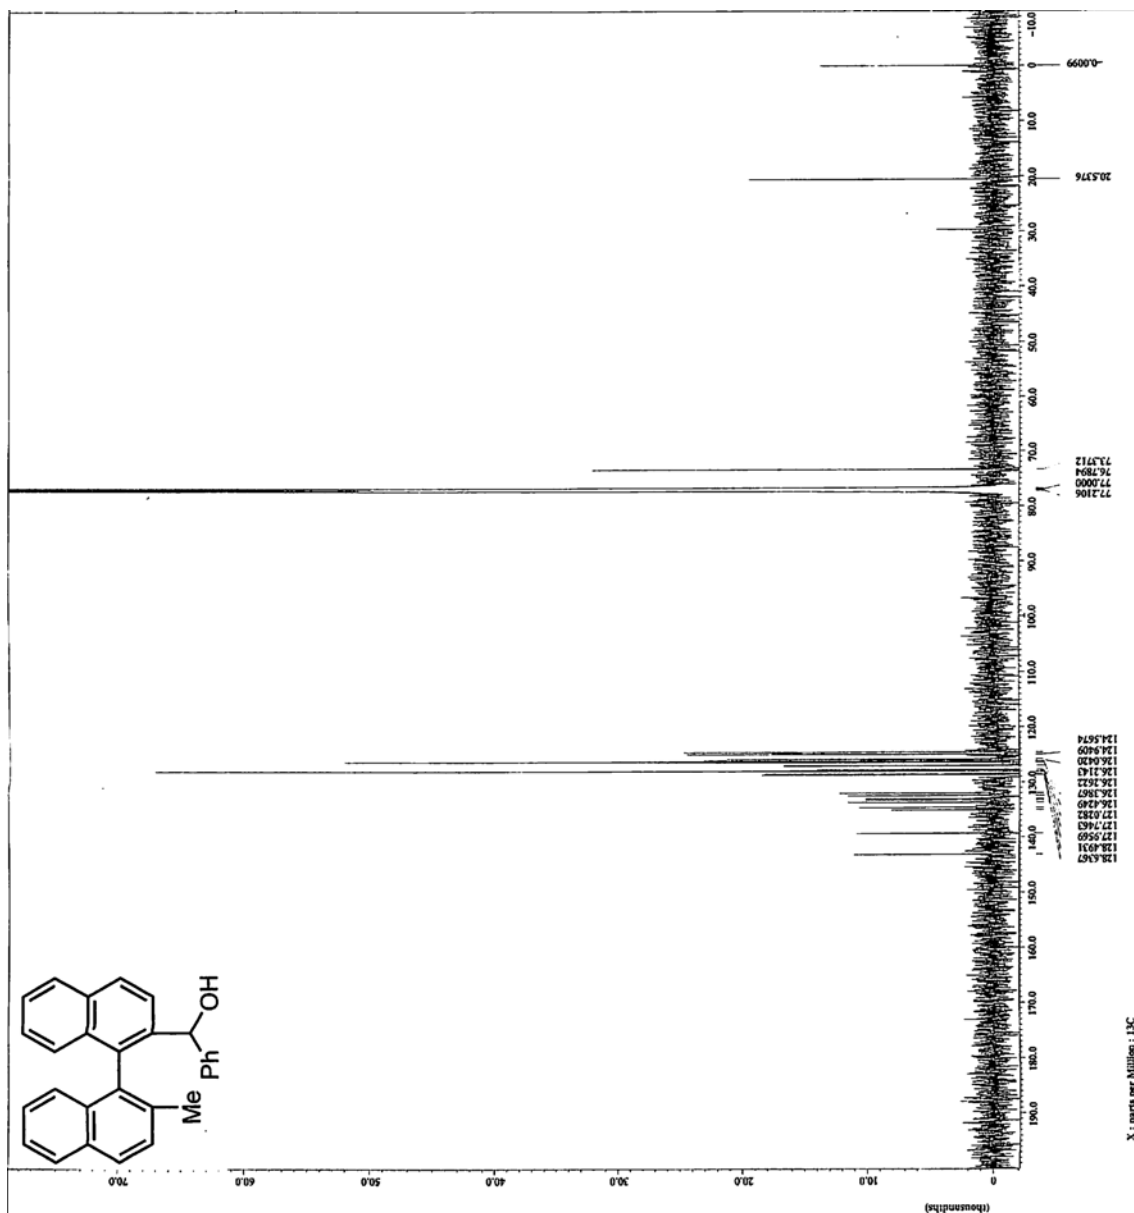

<sup>13</sup>C NMR spectrum of 2-methyl-2'-[hydroxyl(phenyl)methyl]binaphthyl (51)  
(diastereomer ratio = 12/88)

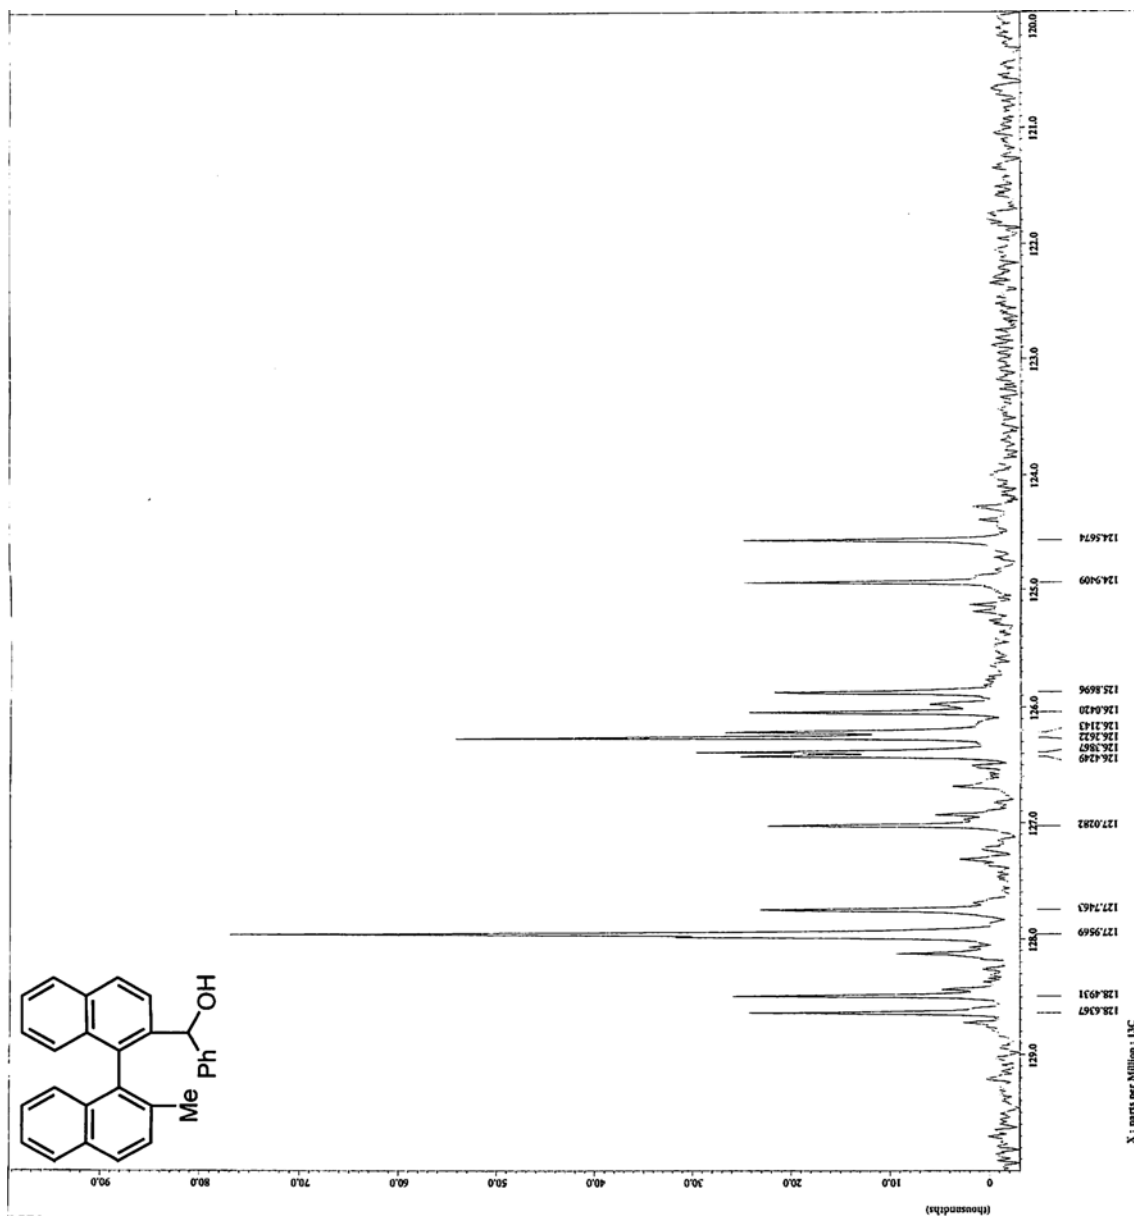

$^{13}\text{C}$  NMR spectrum of 2-methyl-2'-[hydroxyl(phenyl)methyl]binaphthyl (51)  
(diastereomer ratio = 12/88)



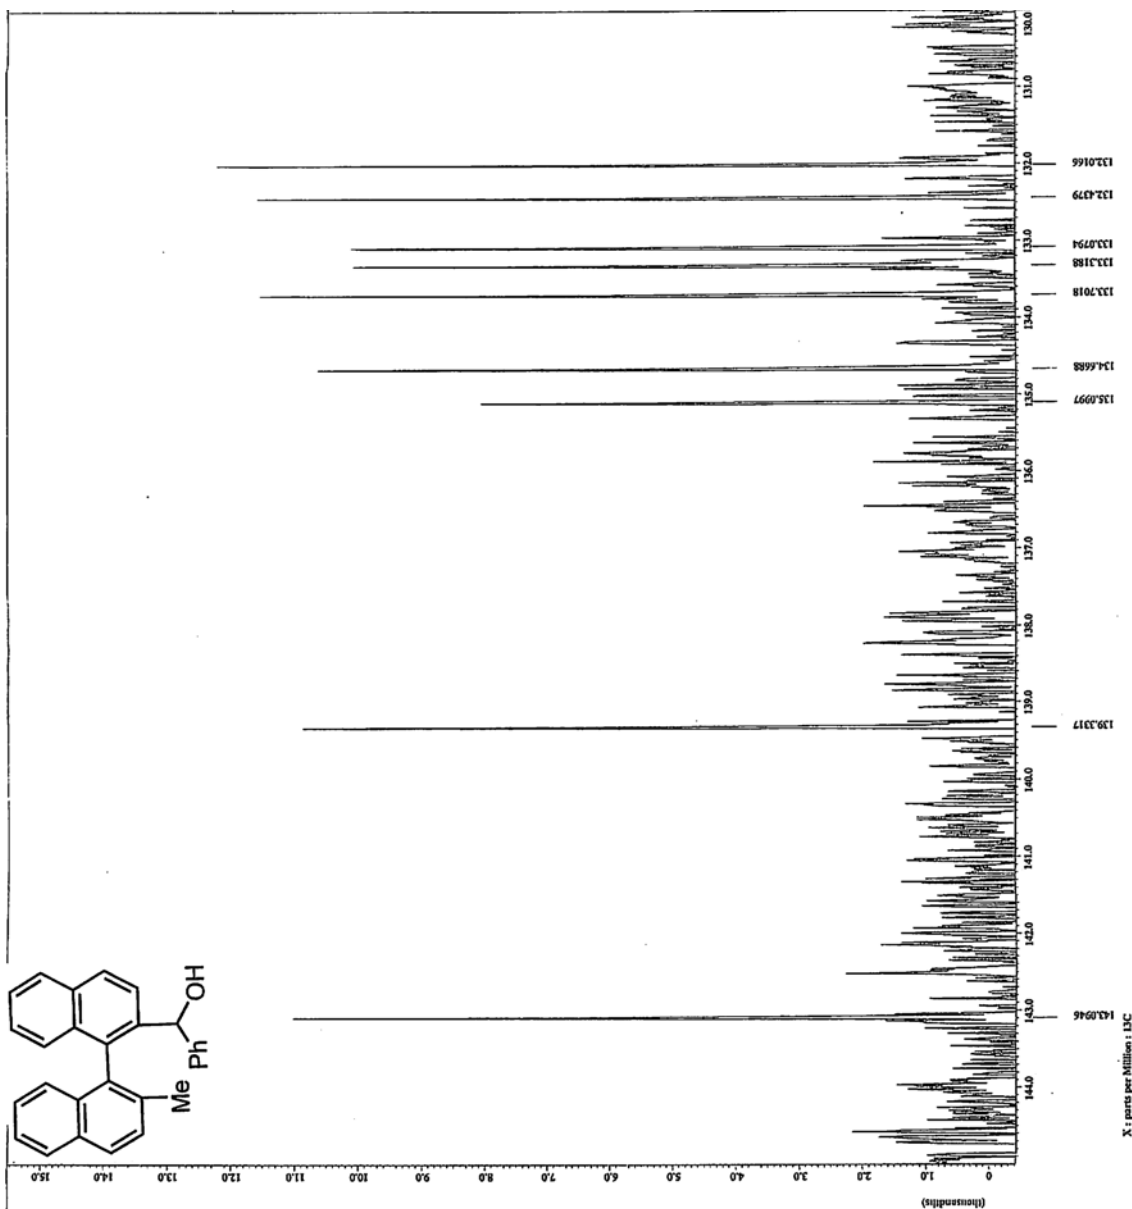

<sup>13</sup>C NMR spectrum of 2-methyl-2'-[hydroxyl(phenyl)methyl]binaphthyl (51)  
(diastereomer ratio = 12/88)

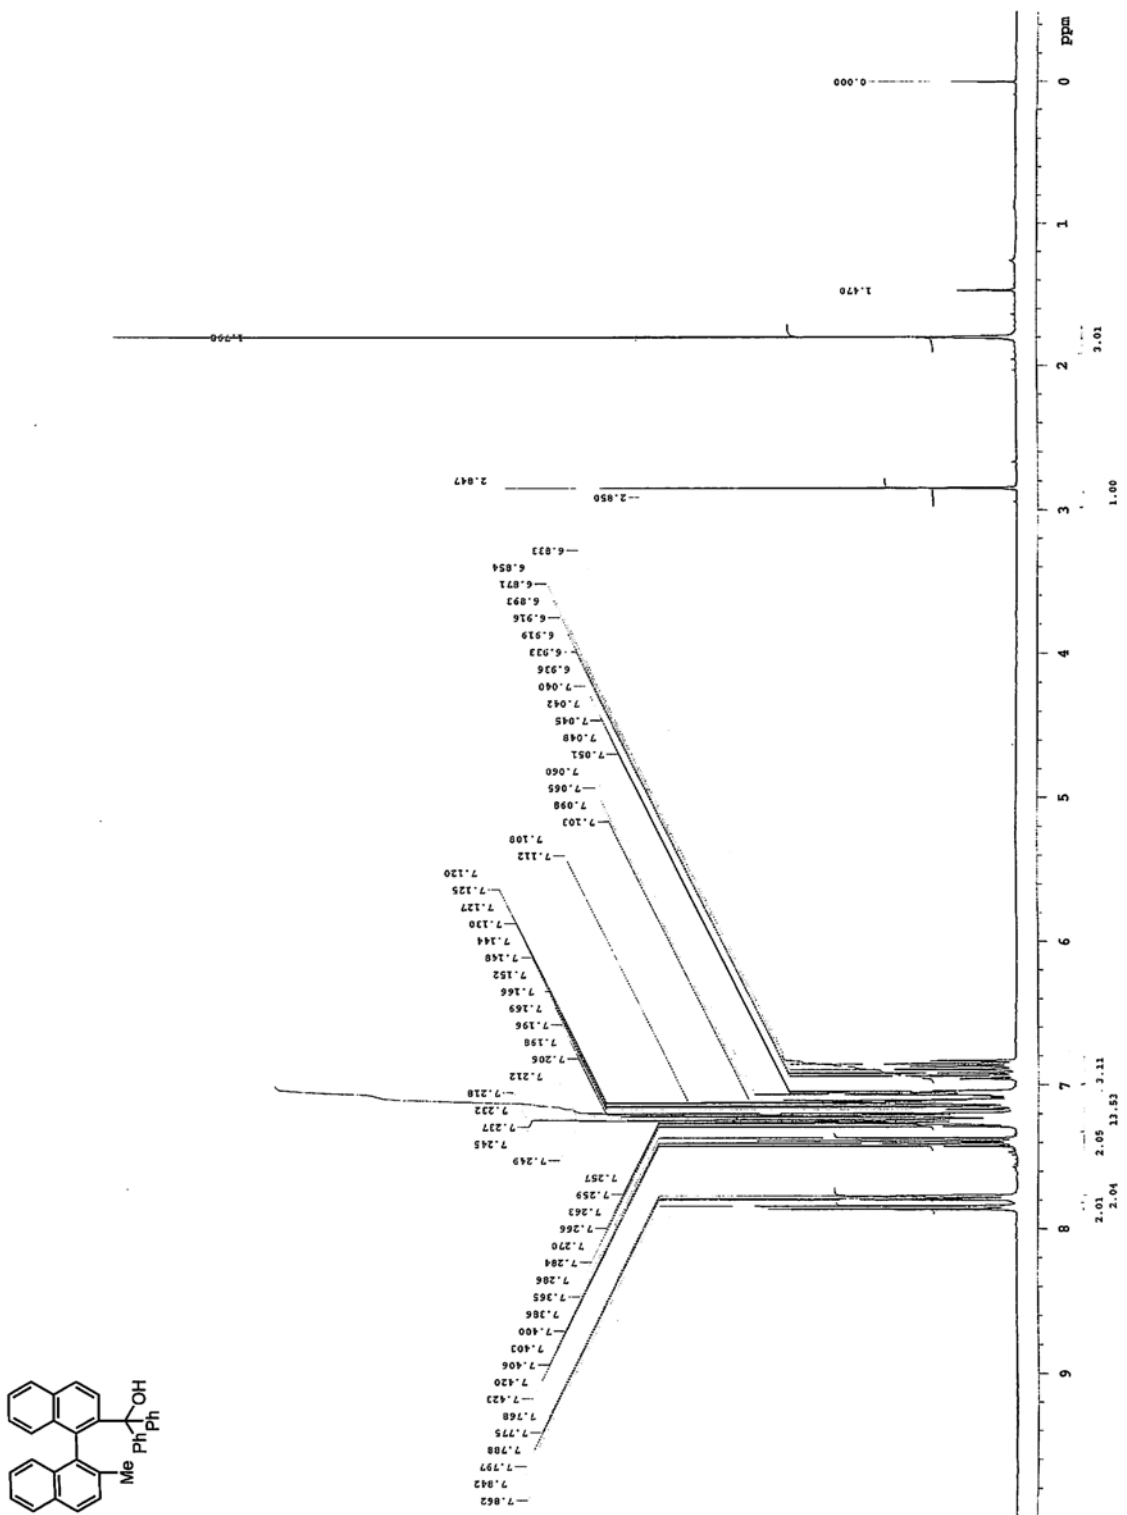

<sup>1</sup>H NMR spectrum of 2-methyl-2'-(hydroxyl(diphenyl)methyl)binaphthyl (52)

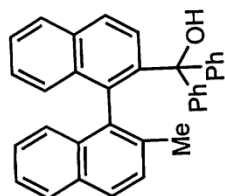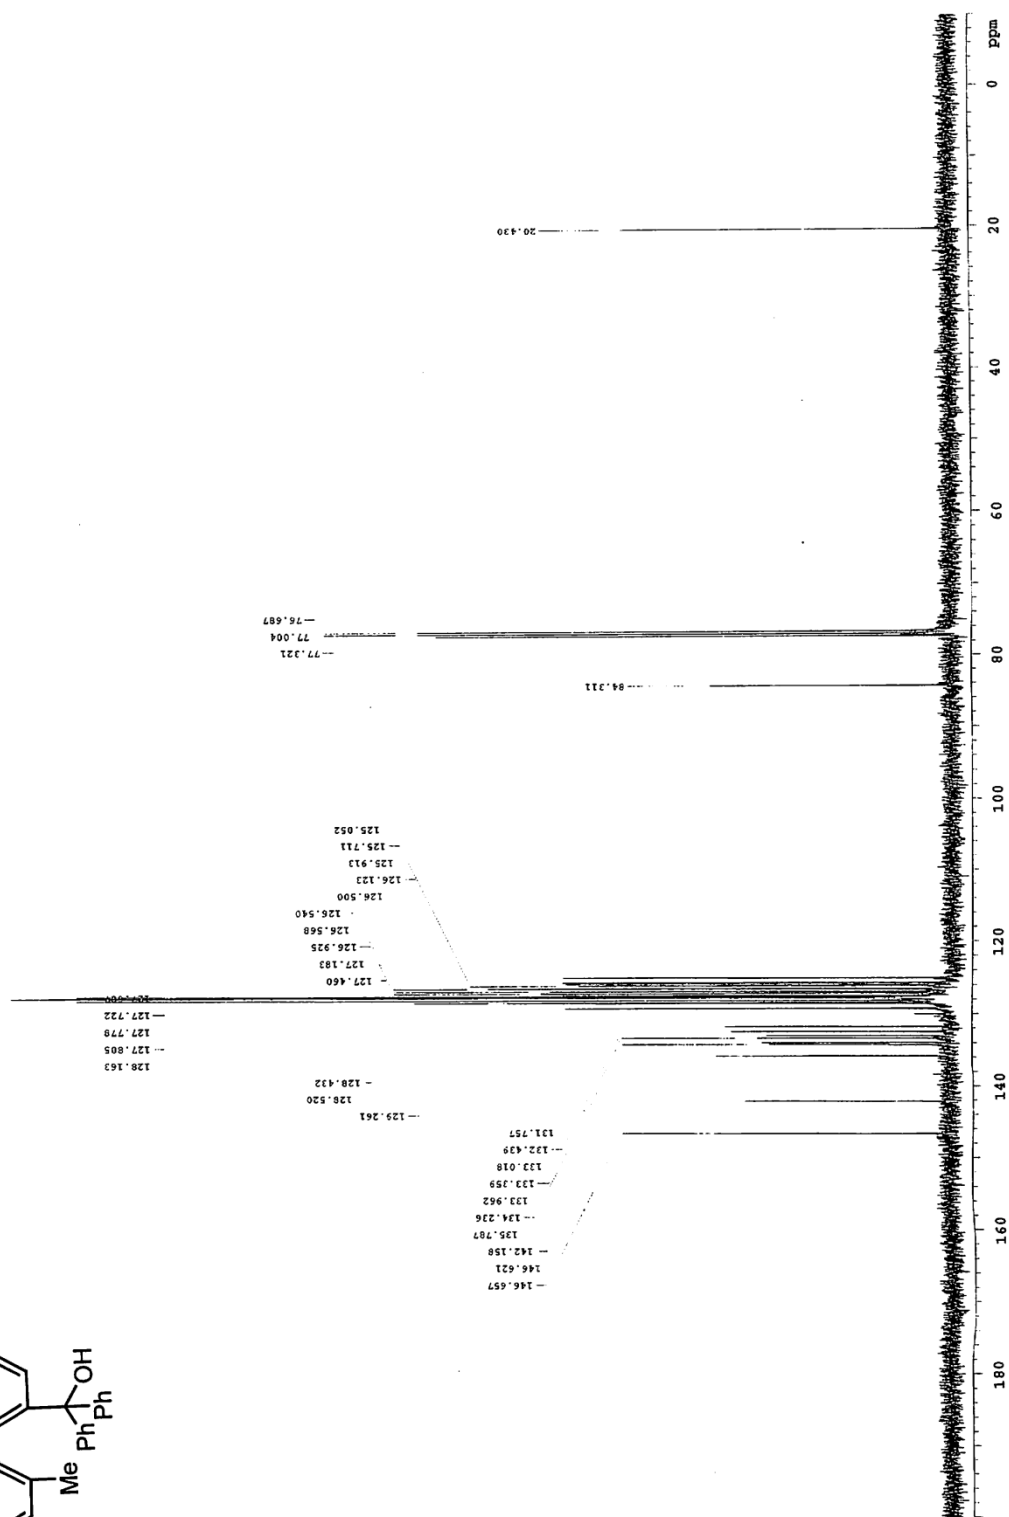

$^{13}\text{C}$  NMR spectrum of 2-methyl-2'-[hydroxyl(diphenyl)methyl]binaphthyl (52)
