# Supplementary material for: Synthesis of unsymmetrically substituted biaryls via sequential lithiation of dibromobiaryls using integrated microflow systems
Source: PubMed Central journal article supplement (PMC2686311; doi:10.3762/bjoc.5.16), 2009-04-29
Supplement: Beilstein_J_Org_Chem-05-16-s002.pdf [file Beilstein_J_Org_Chem-05-16-s002.pdf]

# **Synthesis of unsymmetrically substituted biaryls via sequential lithiation of dibromobiaryls using integrated microflow systems**

Aiichiro Nagaki, Naofumi Takabayashi, Yutaka Tomida, and Jun-ichi Yoshida\*

Address: Department of Synthetic Chemistry and Biological Chemistry, Graduate School of Engineering, Kyoto University, Kyotodaigakukatsura, Nishikyo-ku, Kyoto, 615-8510, Japan

Email: Jun-ichi Yoshida - yoshida@sbchem.kyoto-u.ac.jp

\* Corresponding author

## **Supporting Information**

**$^1\text{H}$  NMR spectra and  $^{13}\text{C}$  NMR spectra of compounds  
4,5,9–16,19,22–26,31–35,39**

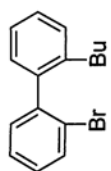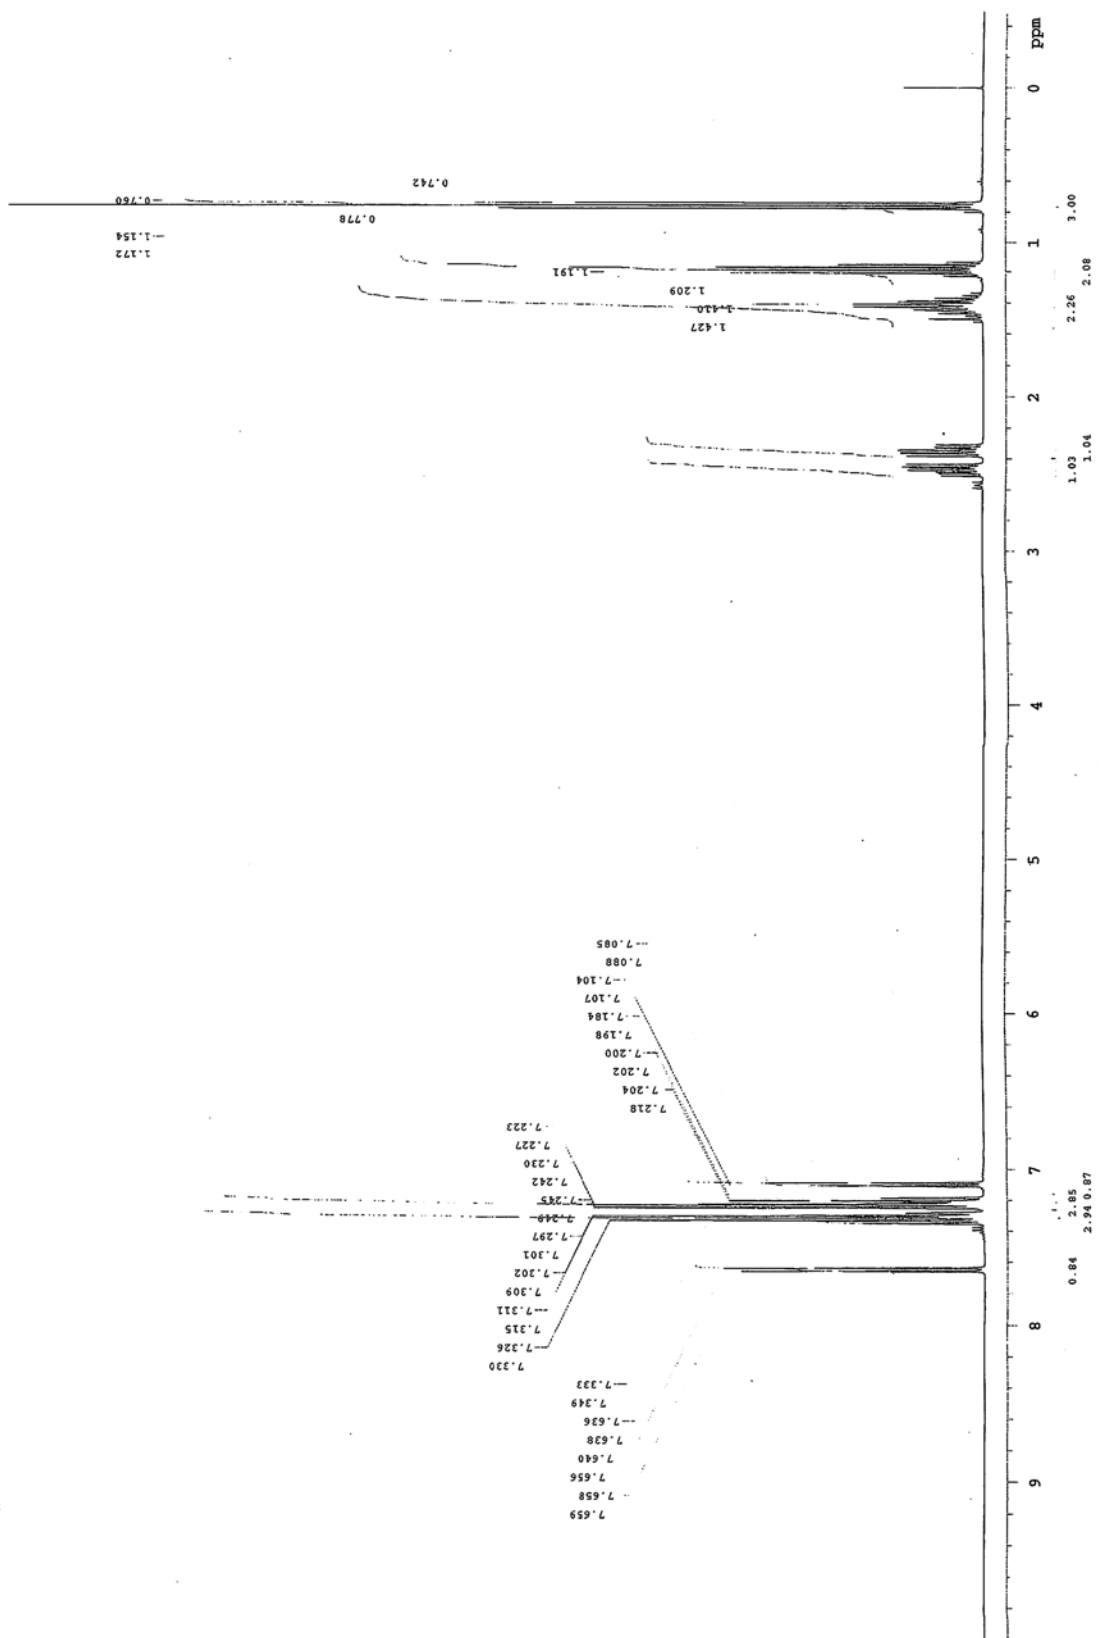

<sup>1</sup>H NMR spectrum of 2-bromo-2'-butylbiphenyl (4)

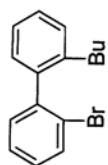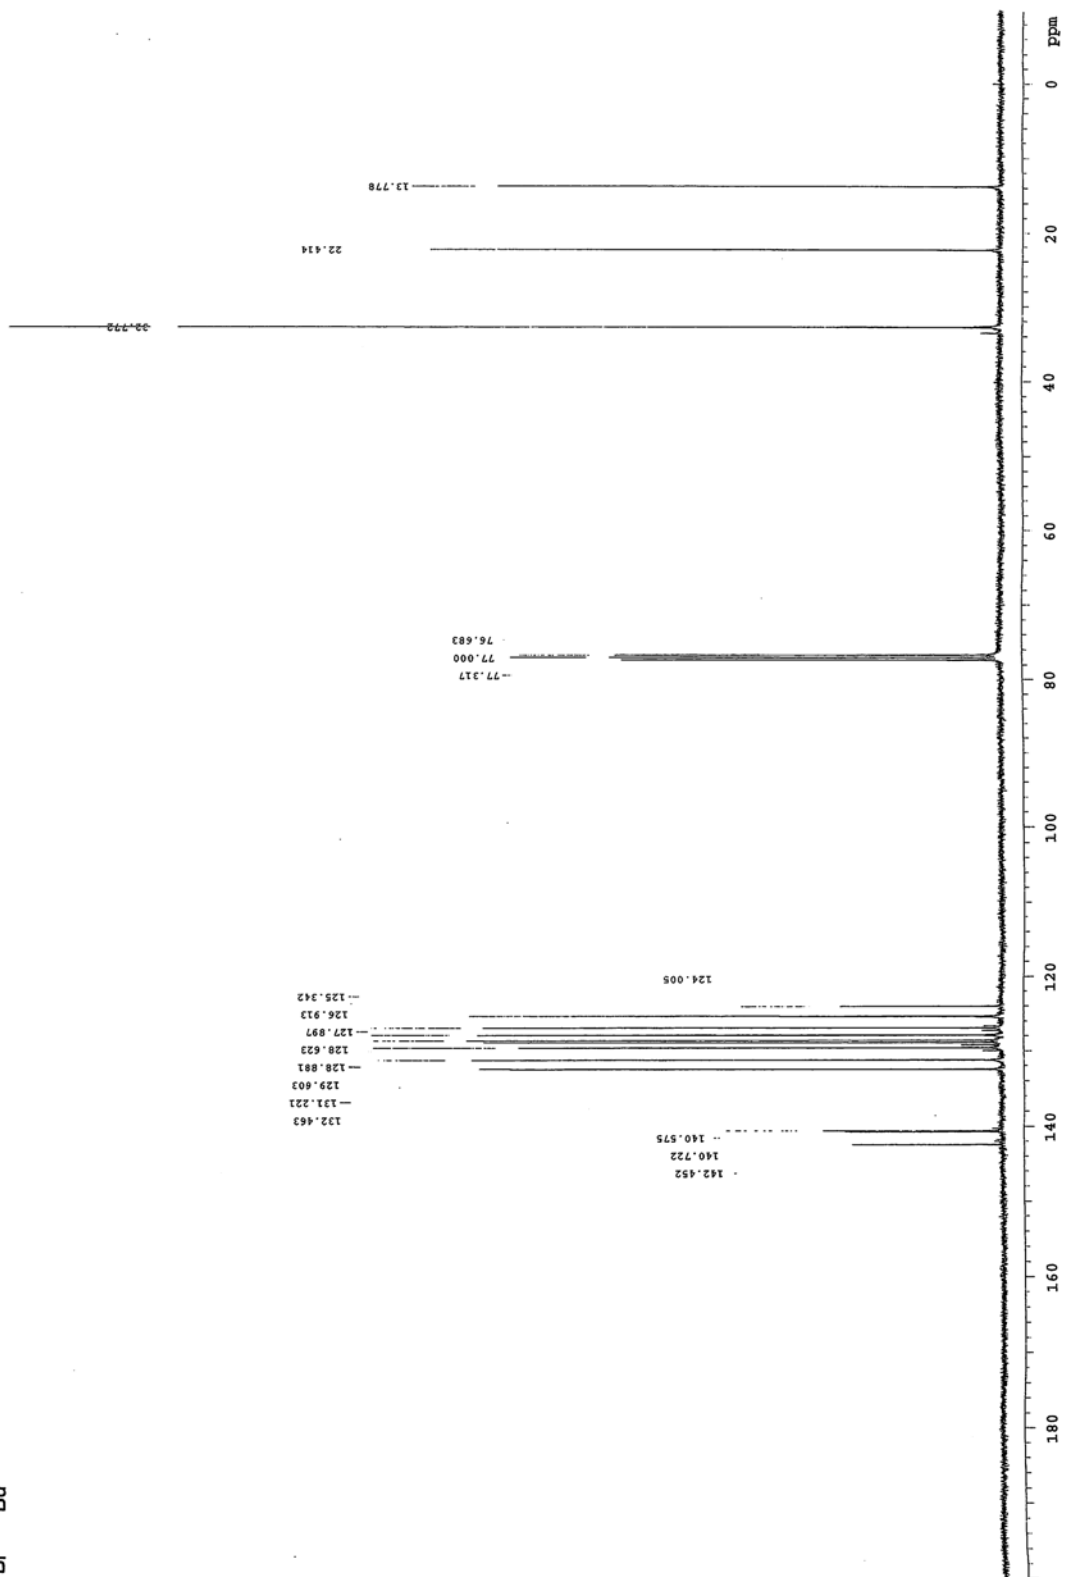

<sup>13</sup>C NMR spectrum of 2-bromo-2'-butylbiphenyl (4)

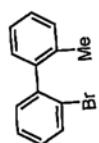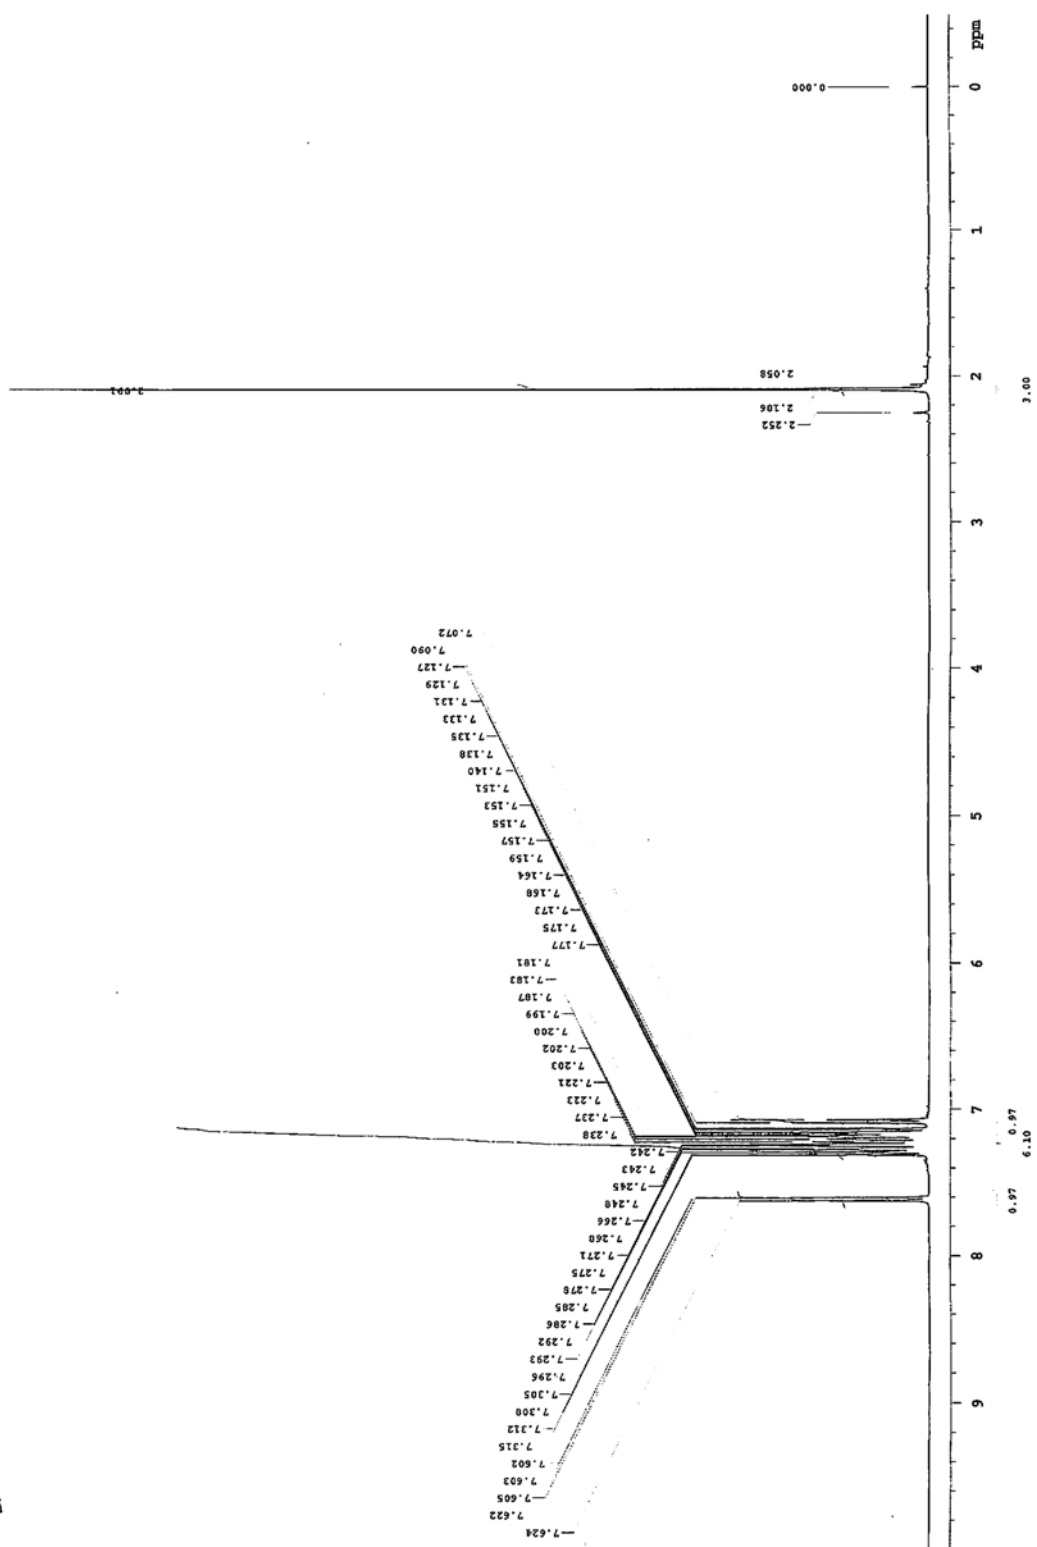

$^1\text{H}$  NMR spectrum of 2-bromo-2'-methylbiphenyl (5)

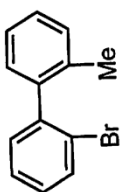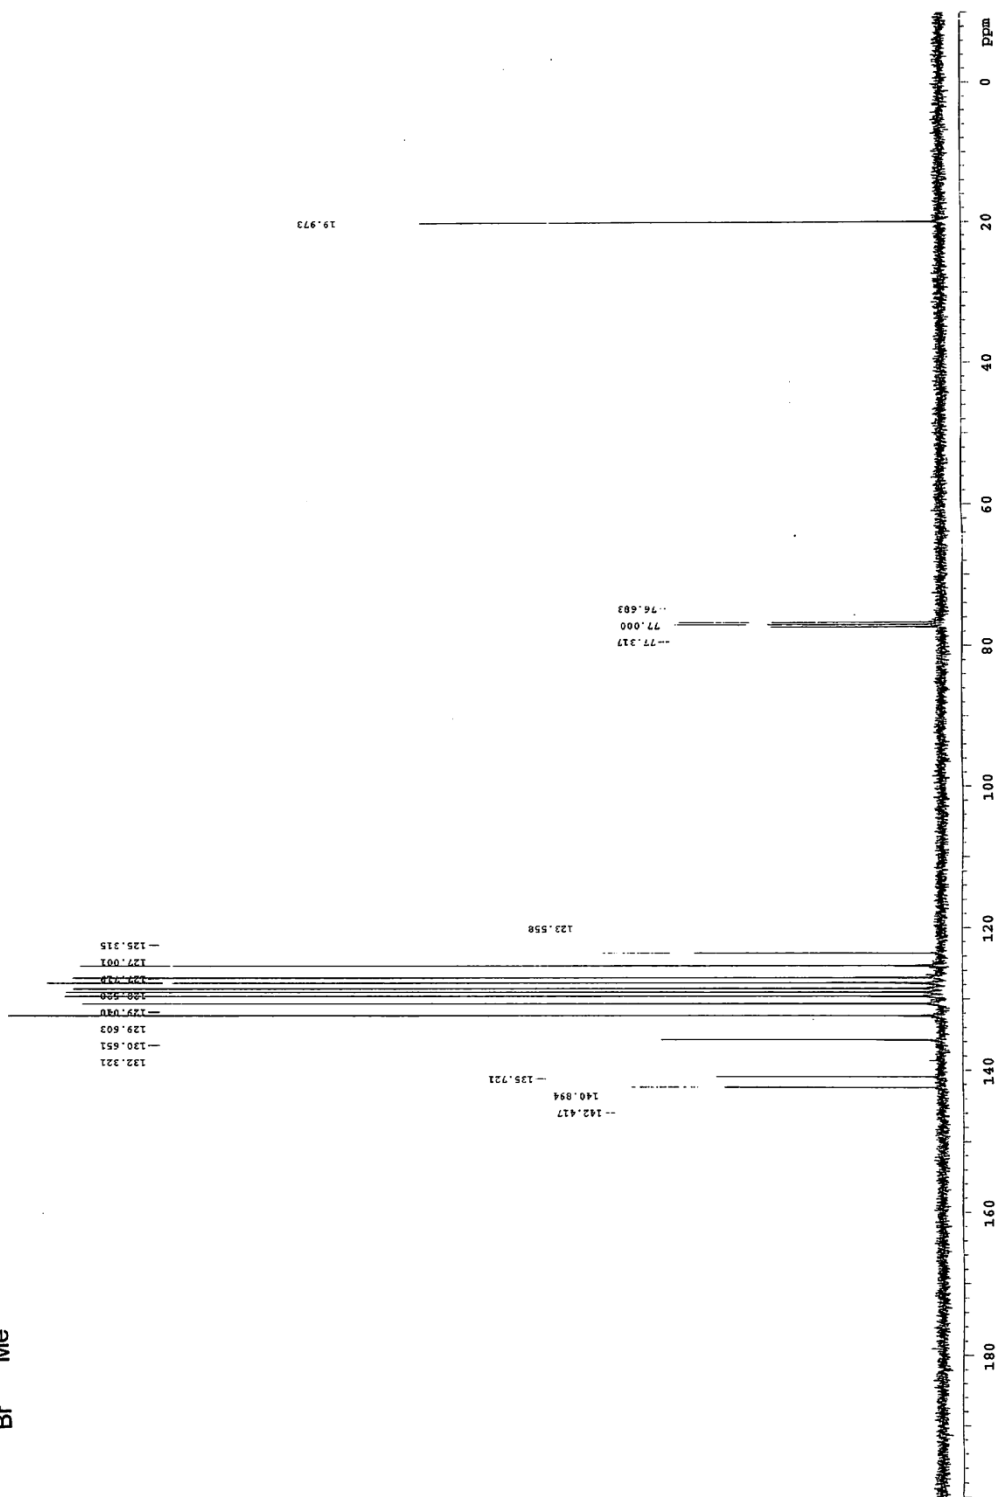

$^{13}\text{C}$  NMR spectrum of 2-bromo-2'-methylbiphenyl (5)

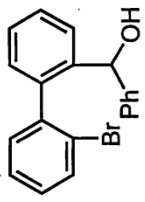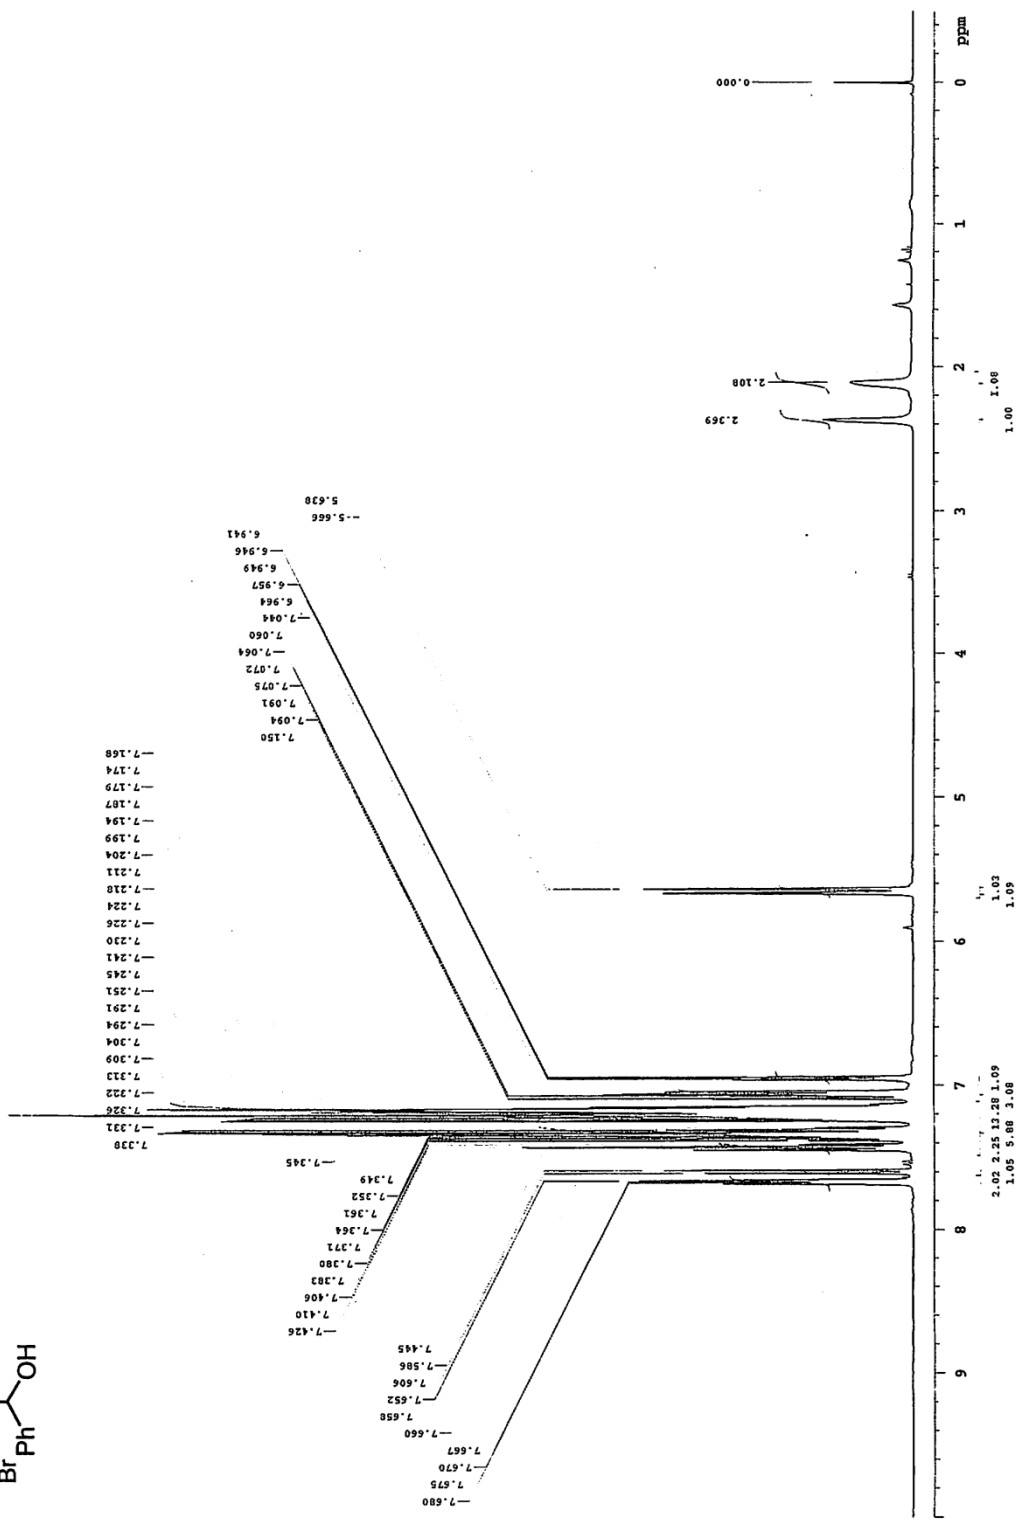

<sup>1</sup>H NMR spectrum of 2-bromo-2'-[hydroxyl(phenyl)methyl]biphenyl (9)

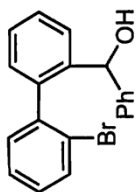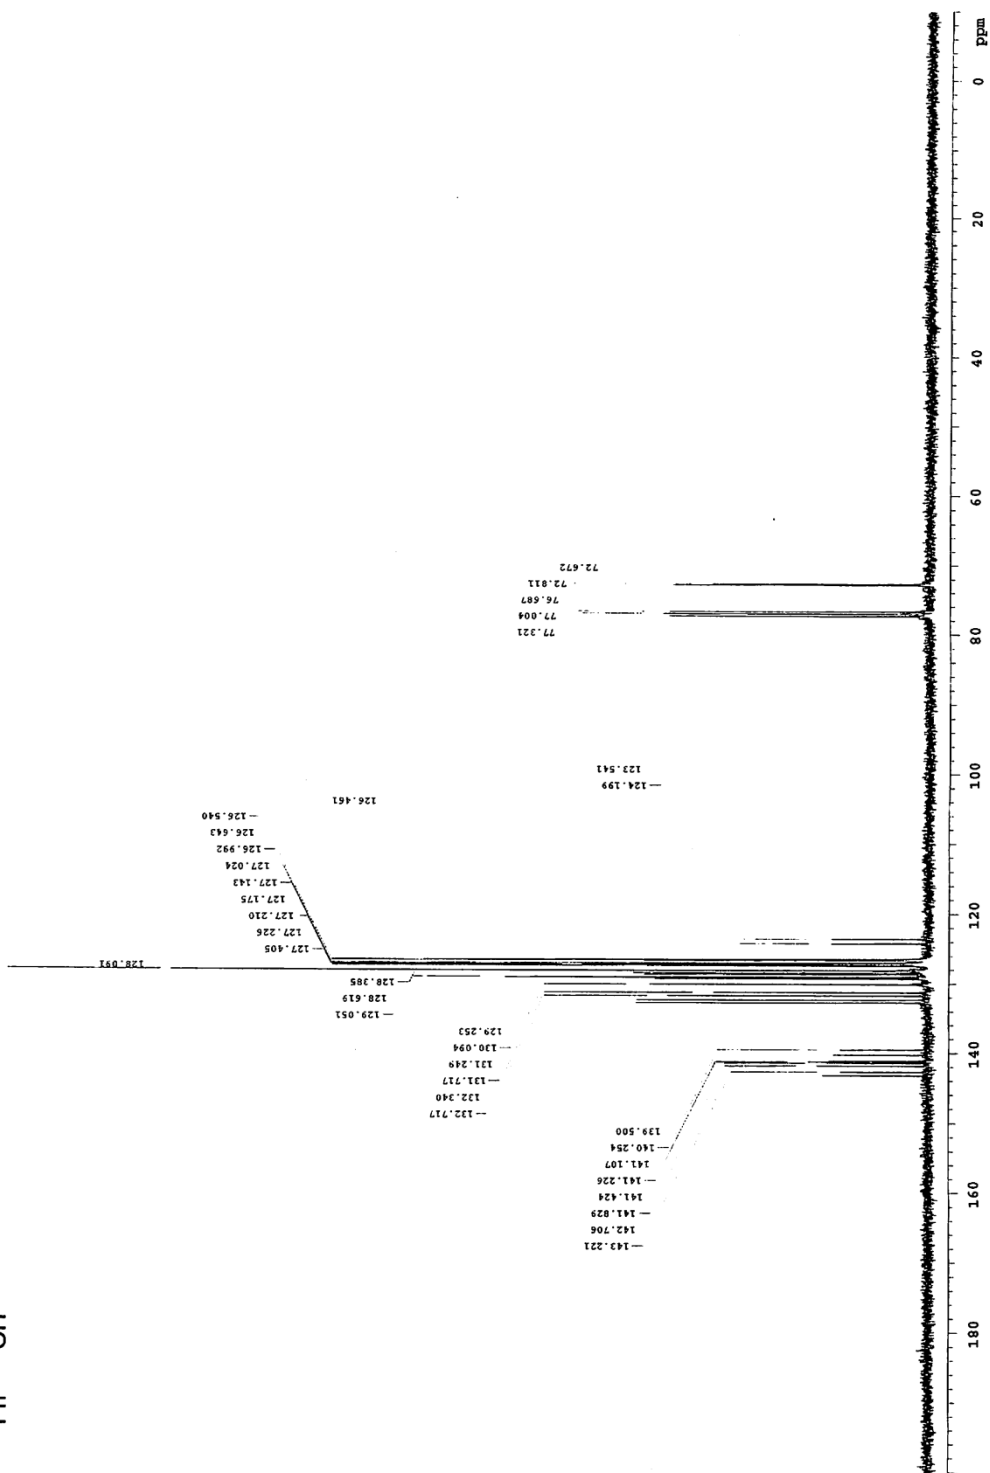

$^{13}\text{C}$  NMR spectrum of 2-bromo-2'-[hydroxyl(phenyl)methyl]biphenyl (9)

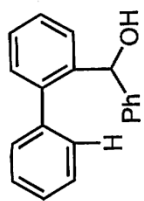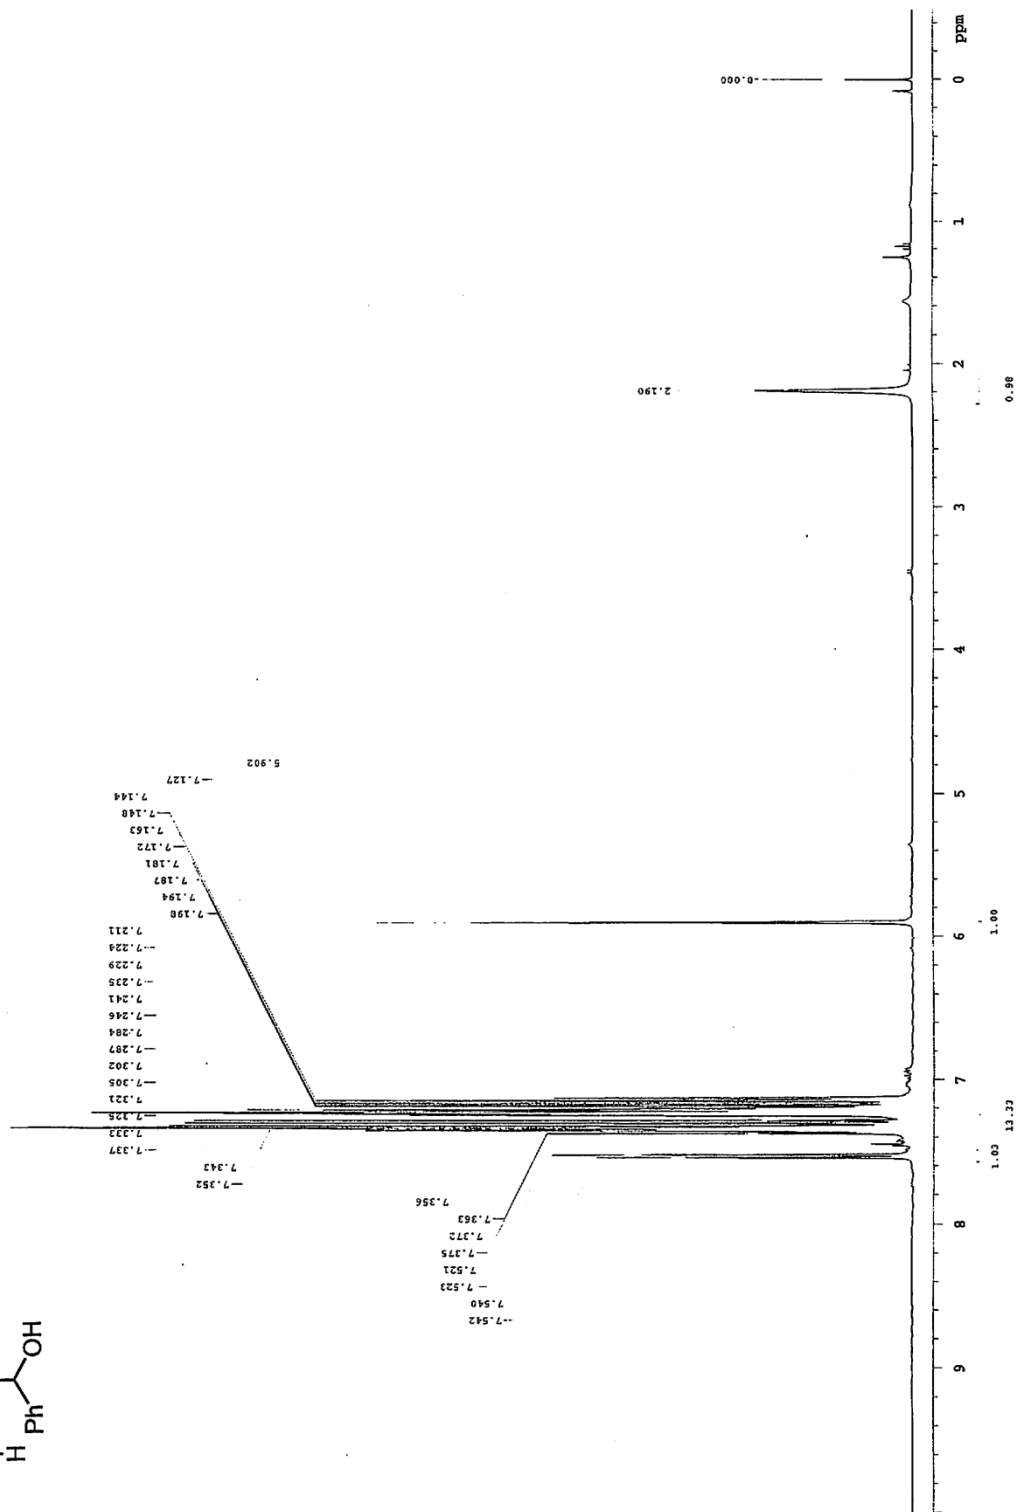

<sup>1</sup>H NMR spectrum of 2-[hydroxyl(phenyl)methyl]biphenyl (10)



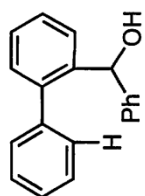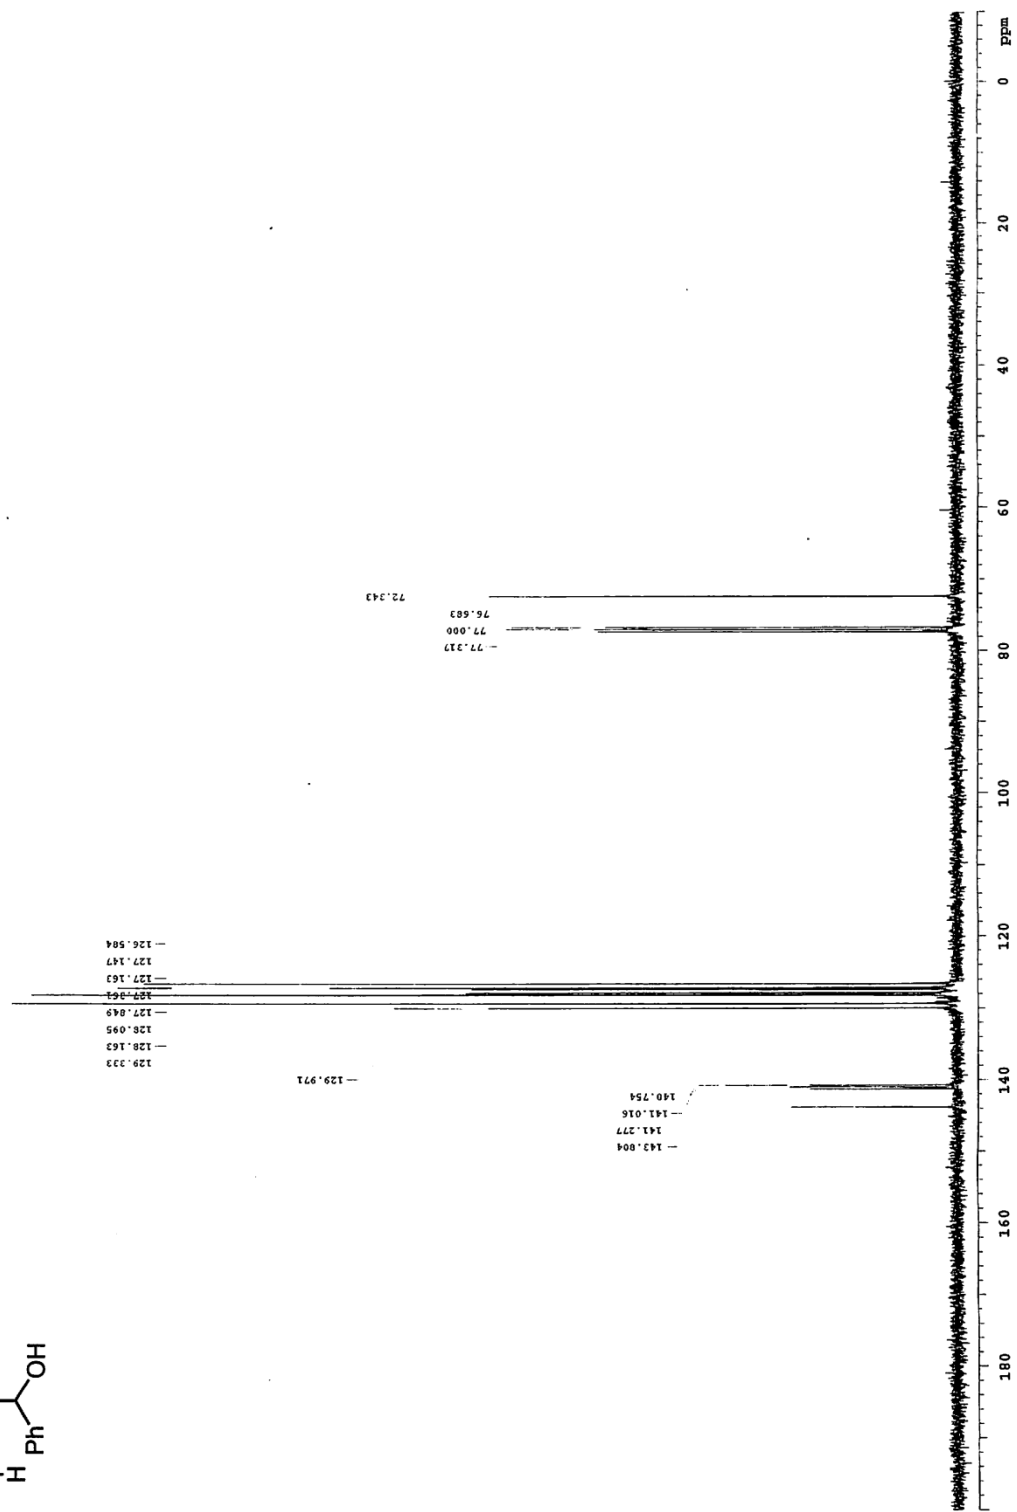

<sup>13</sup>C NMR spectrum of 2-[hydroxyl(phenyl)methyl]biphenyl (10)

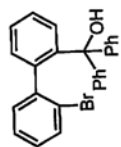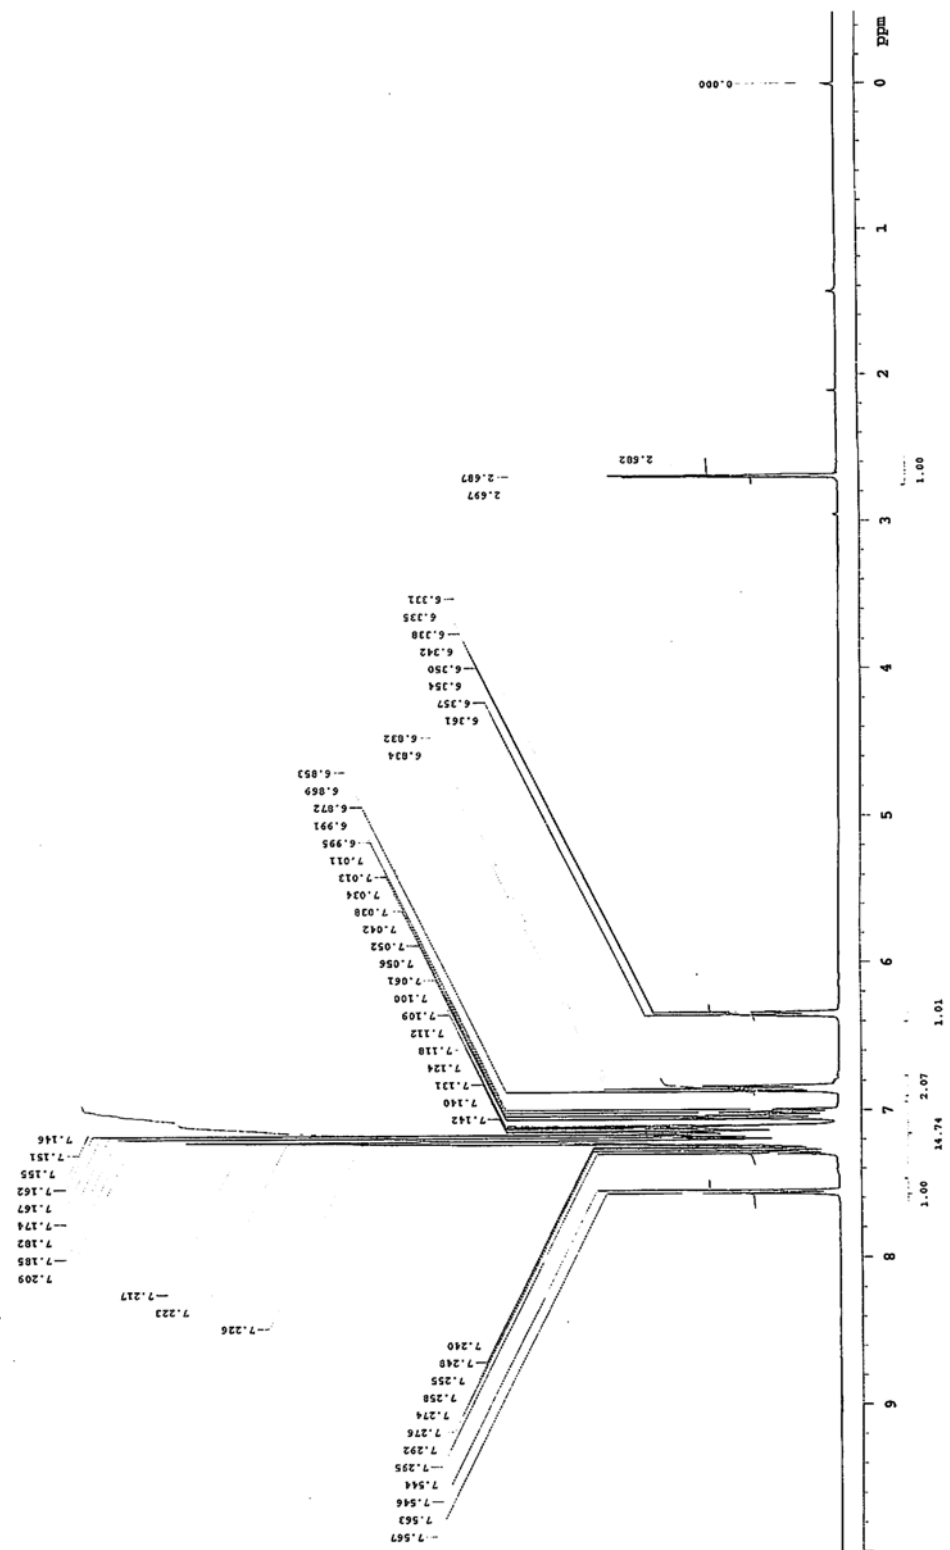

<sup>1</sup>H NMR spectrum of 2-bromo-2'-[hydroxyl(diphenyl)methyl]biphenyl (11)

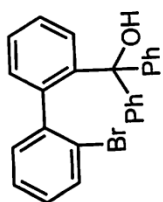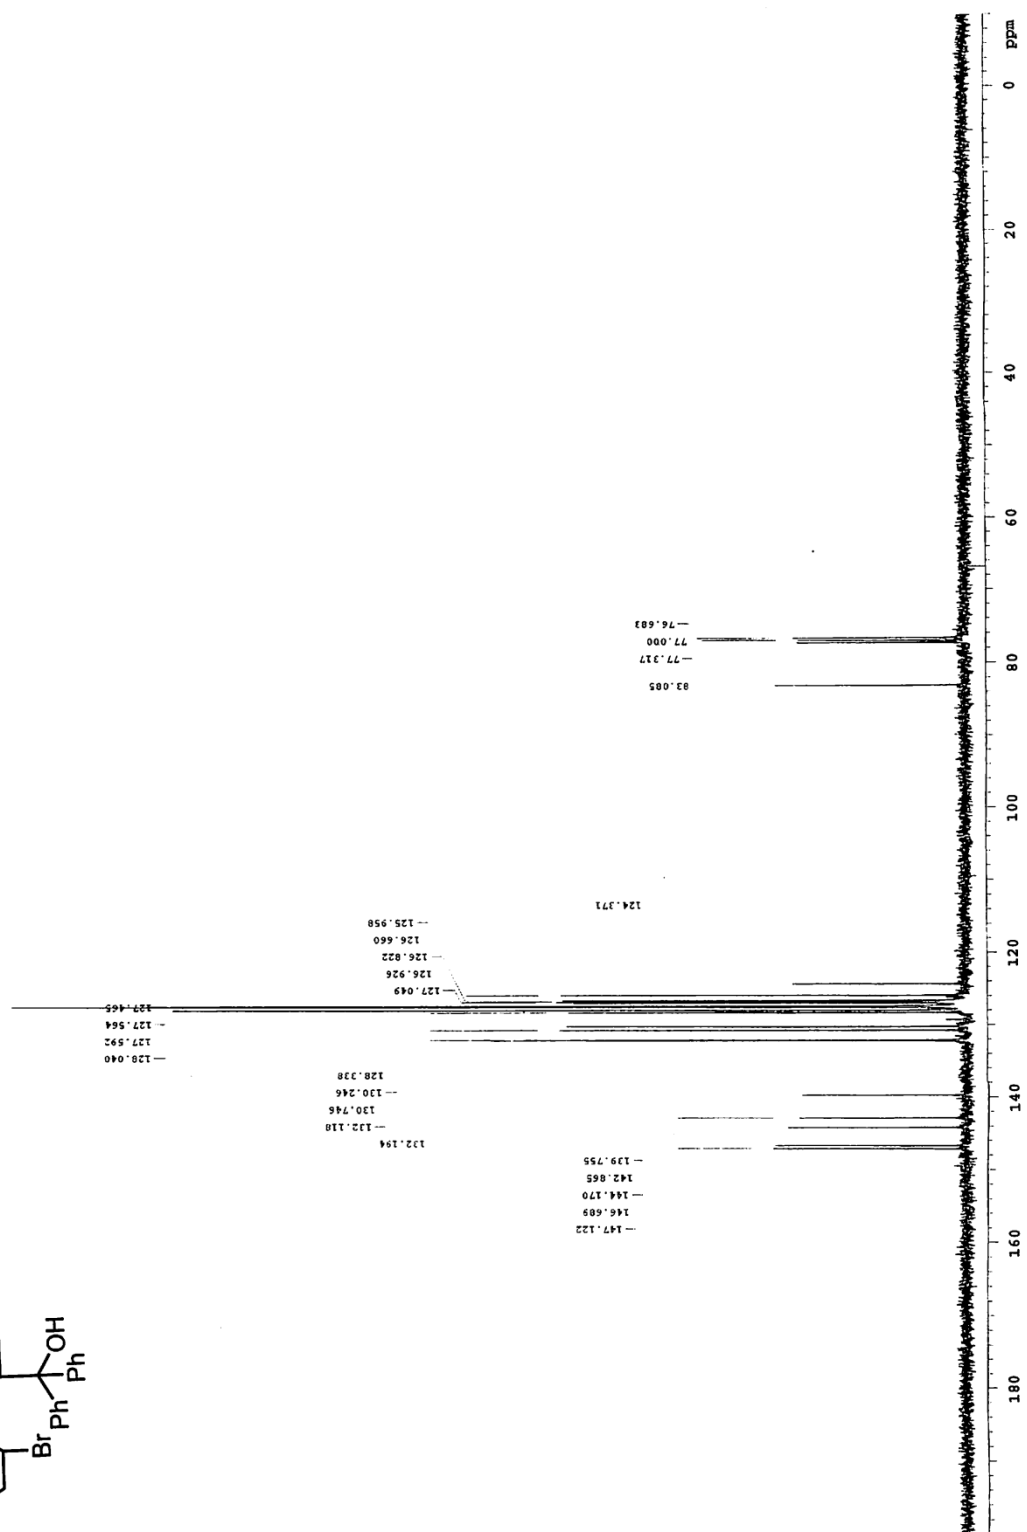

<sup>13</sup>C NMR spectrum of 2-bromo-2'-[hydroxyl(diphenyl)methyl]biphenyl (11)

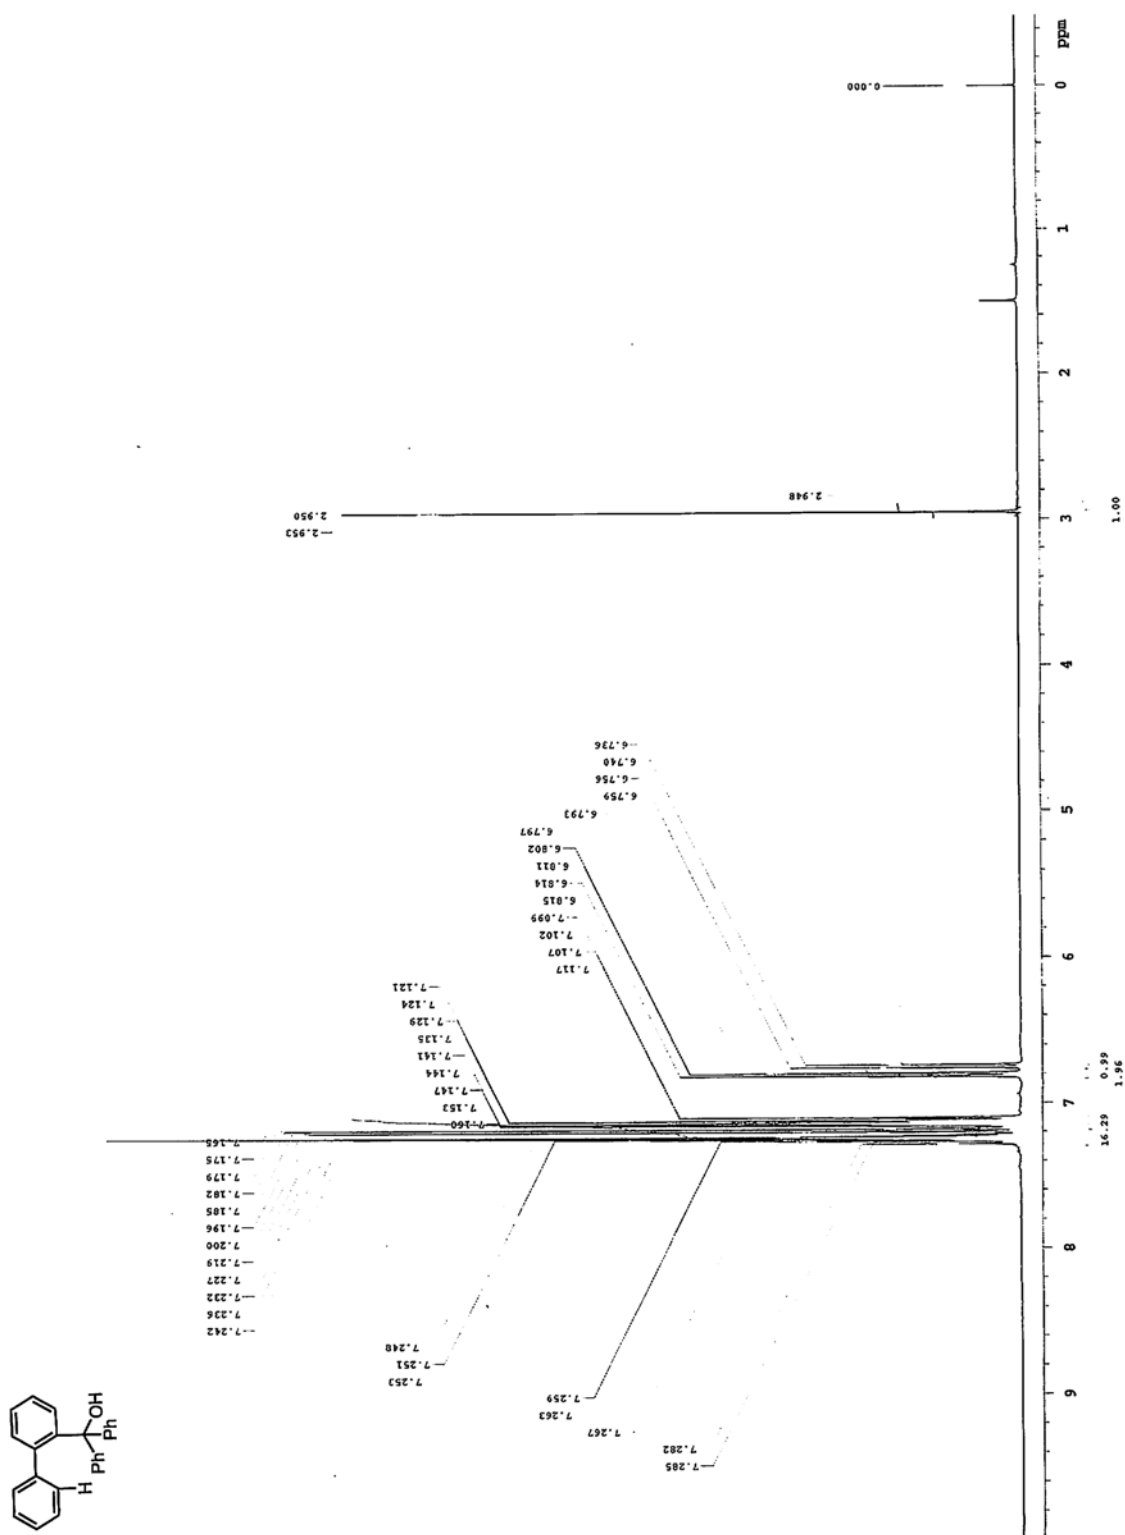

<sup>1</sup>H NMR spectrum of 2-[hydroxyl(diphenyl)methyl]biphenyl (12)

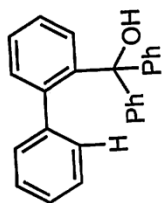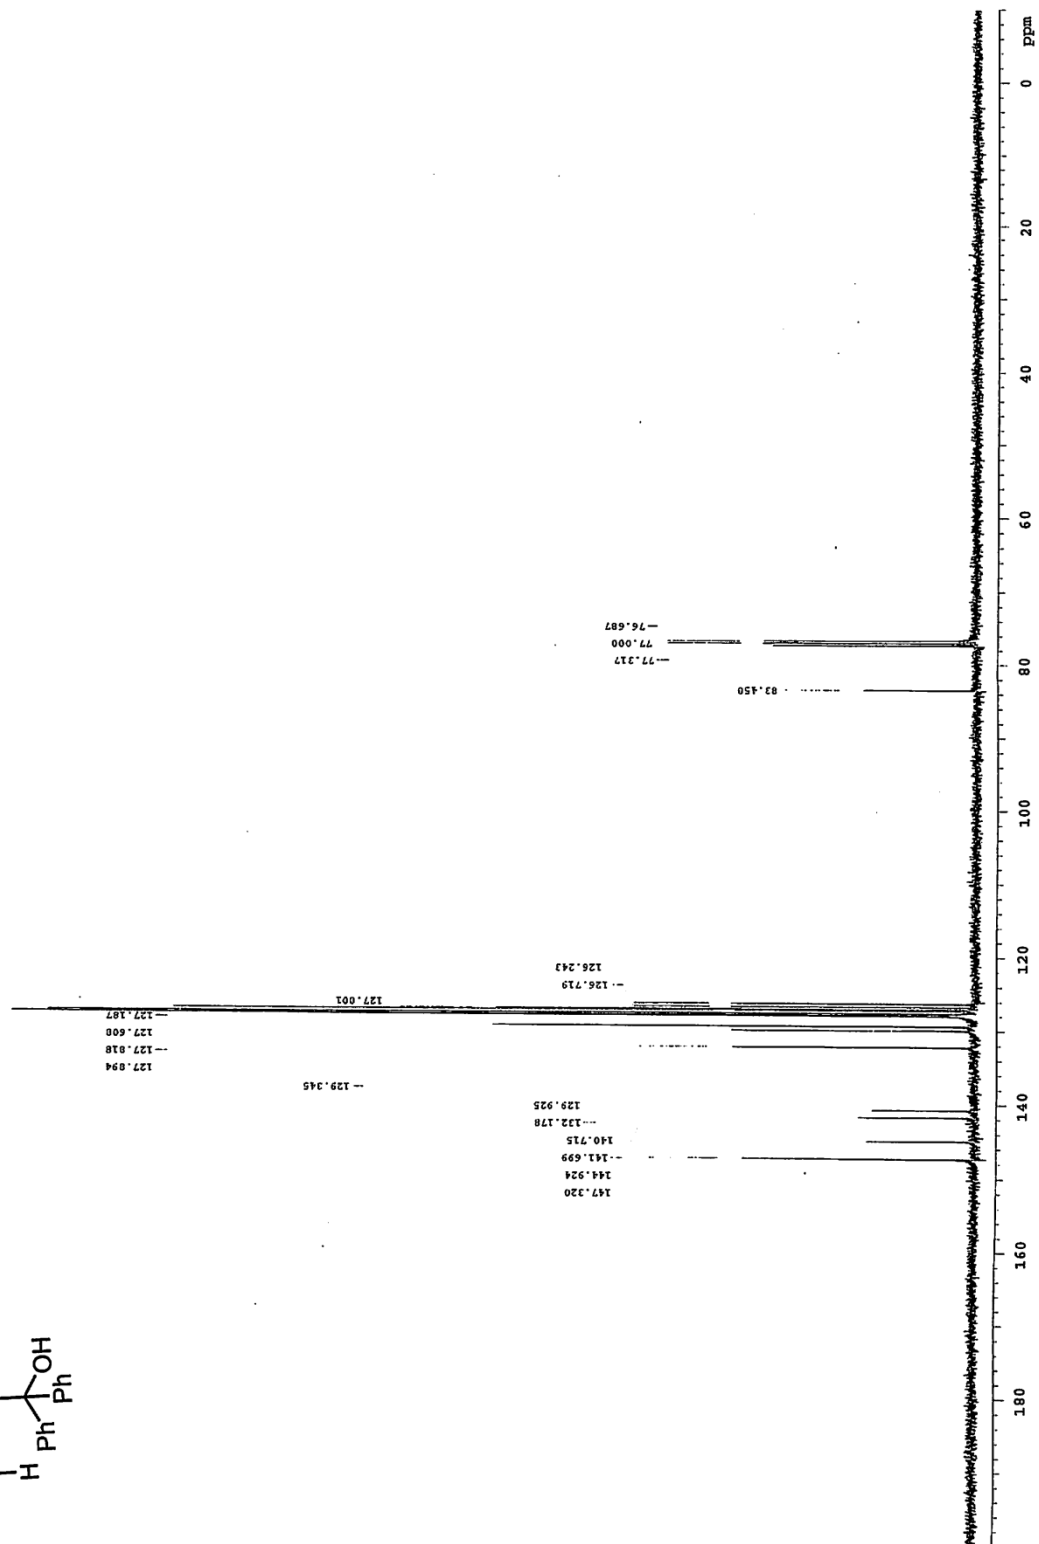

<sup>13</sup>C NMR spectrum of 2-[hydroxyl(diphenyl)methyl]biphenyl (12)

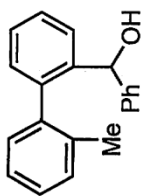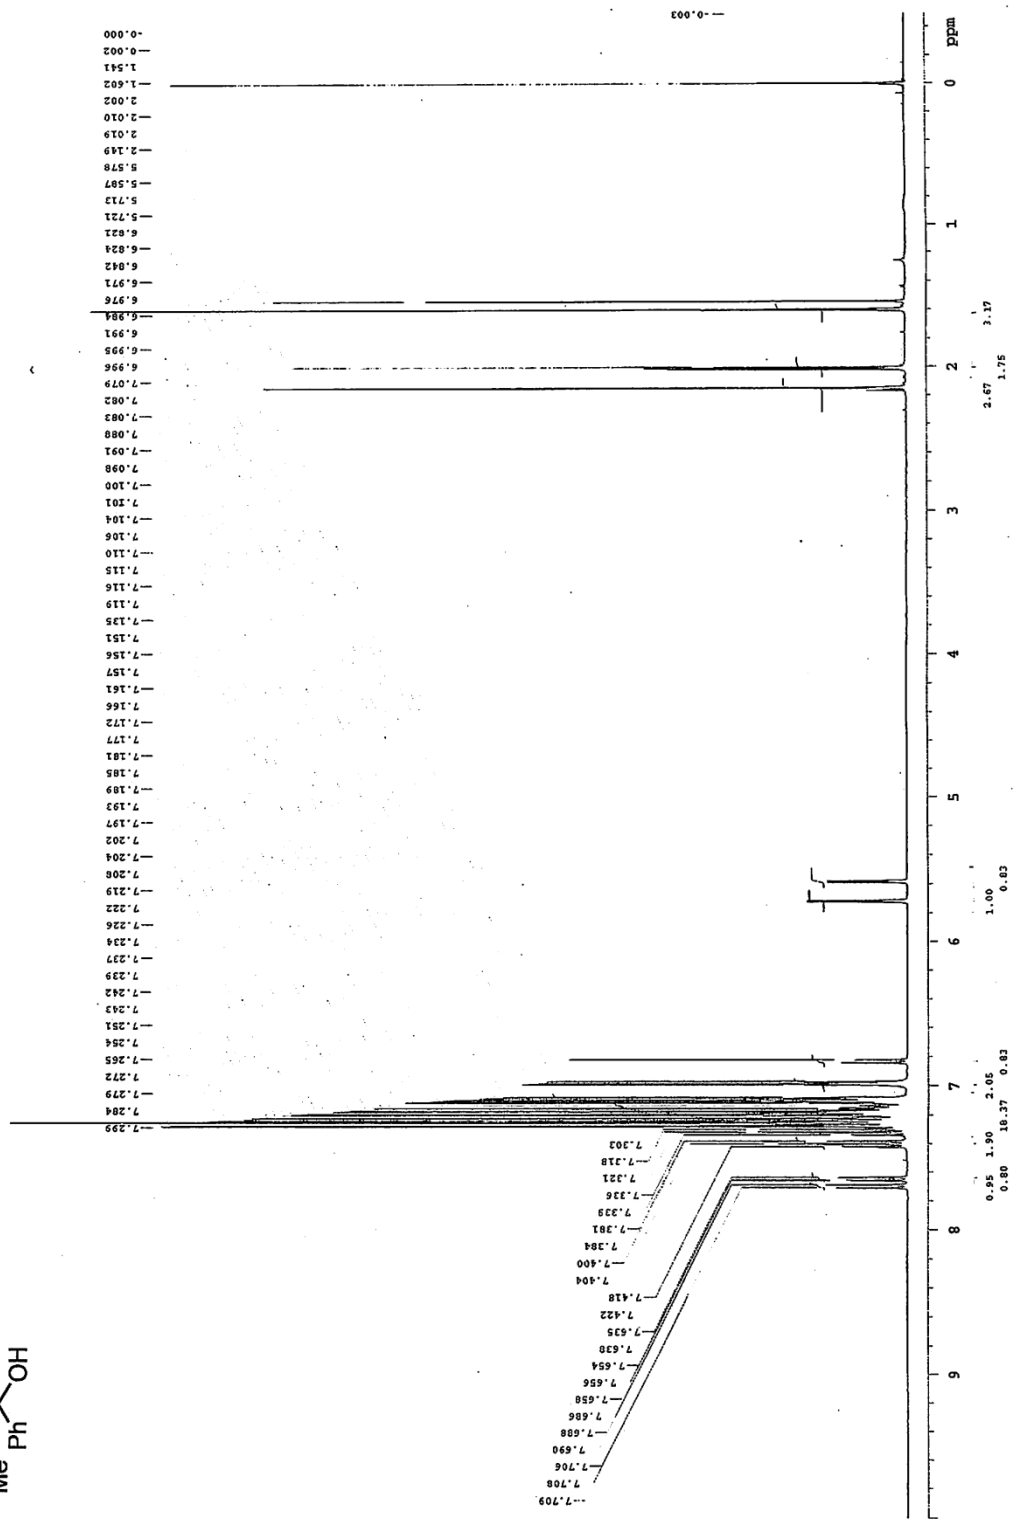

<sup>1</sup>H NMR spectrum of 2-methyl-2'-[hydroxyl(phenyl)methyl]biphenyl (13)

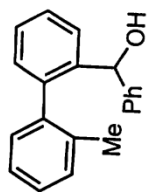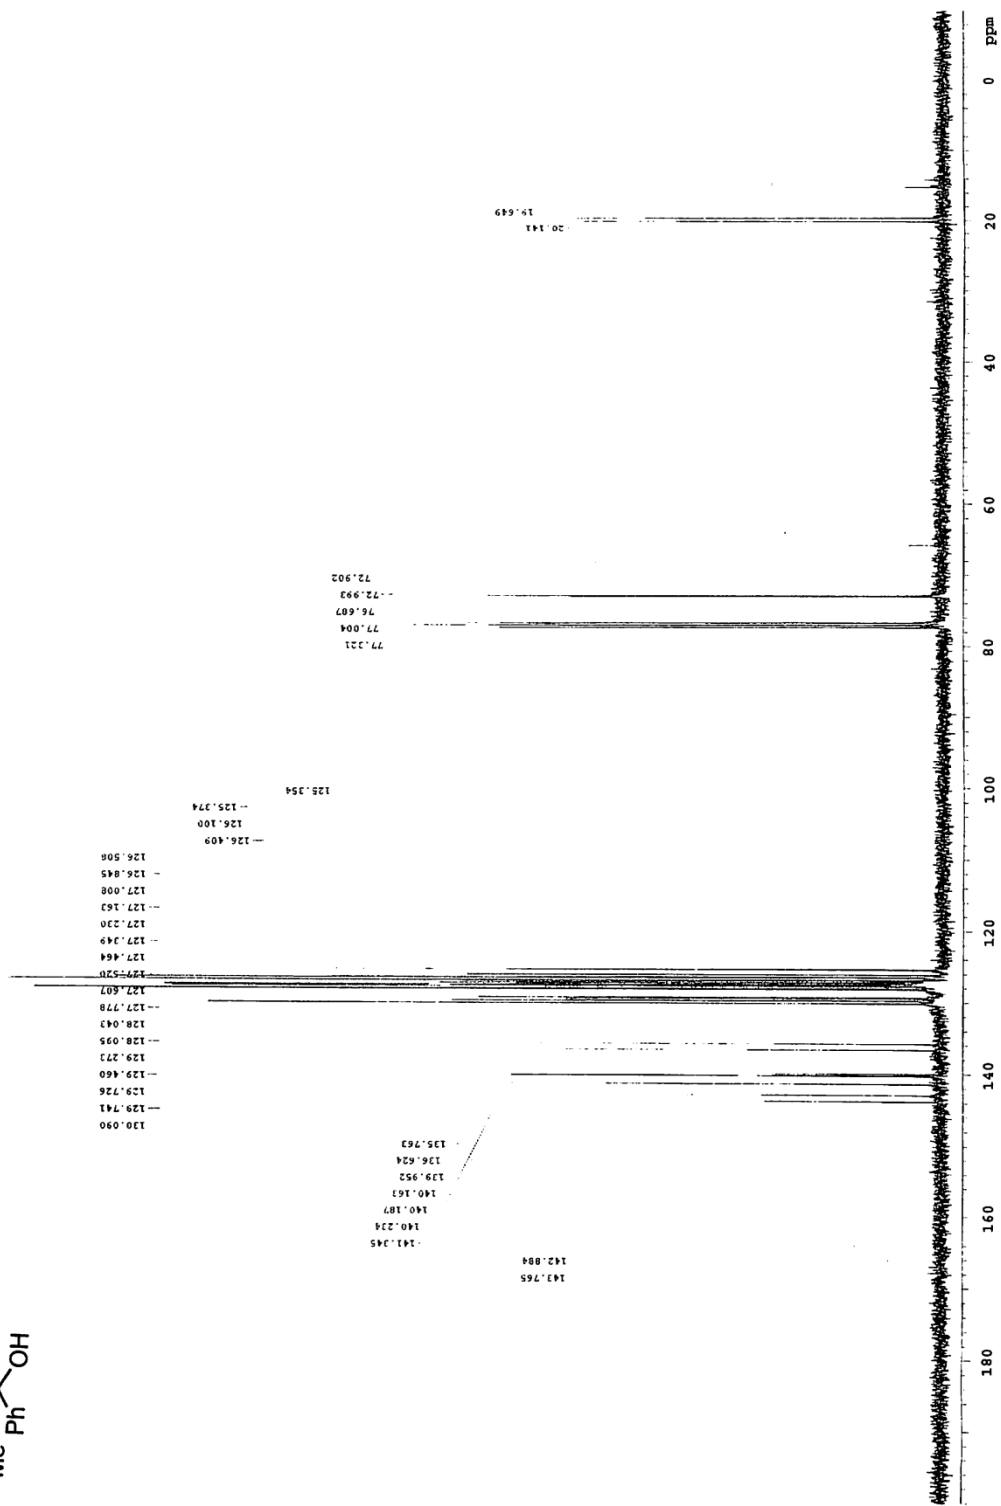

<sup>13</sup>C NMR spectrum of 2-methyl-2'-[hydroxyl(phenyl)methyl]biphenyl (13)

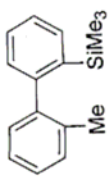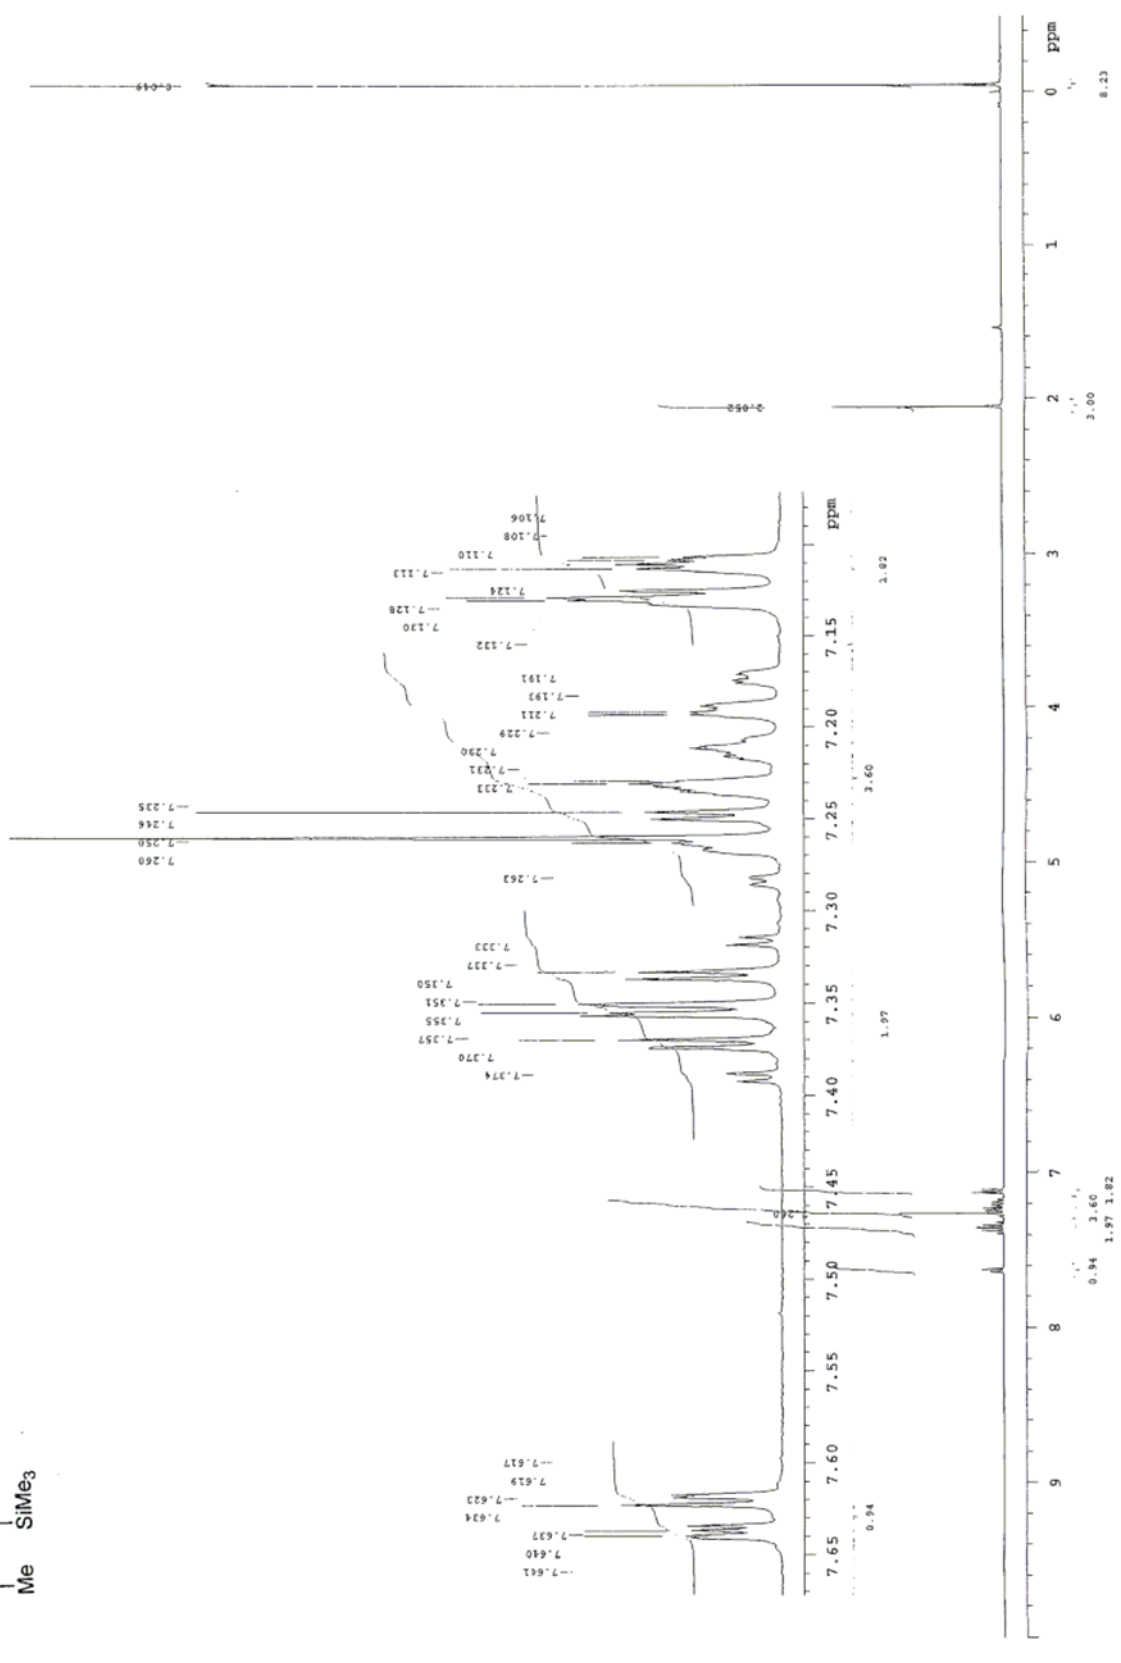

<sup>1</sup>H NMR spectrum of 2-methyl-2'-trimethylsilylbiphenyl (14)



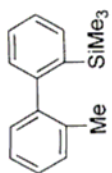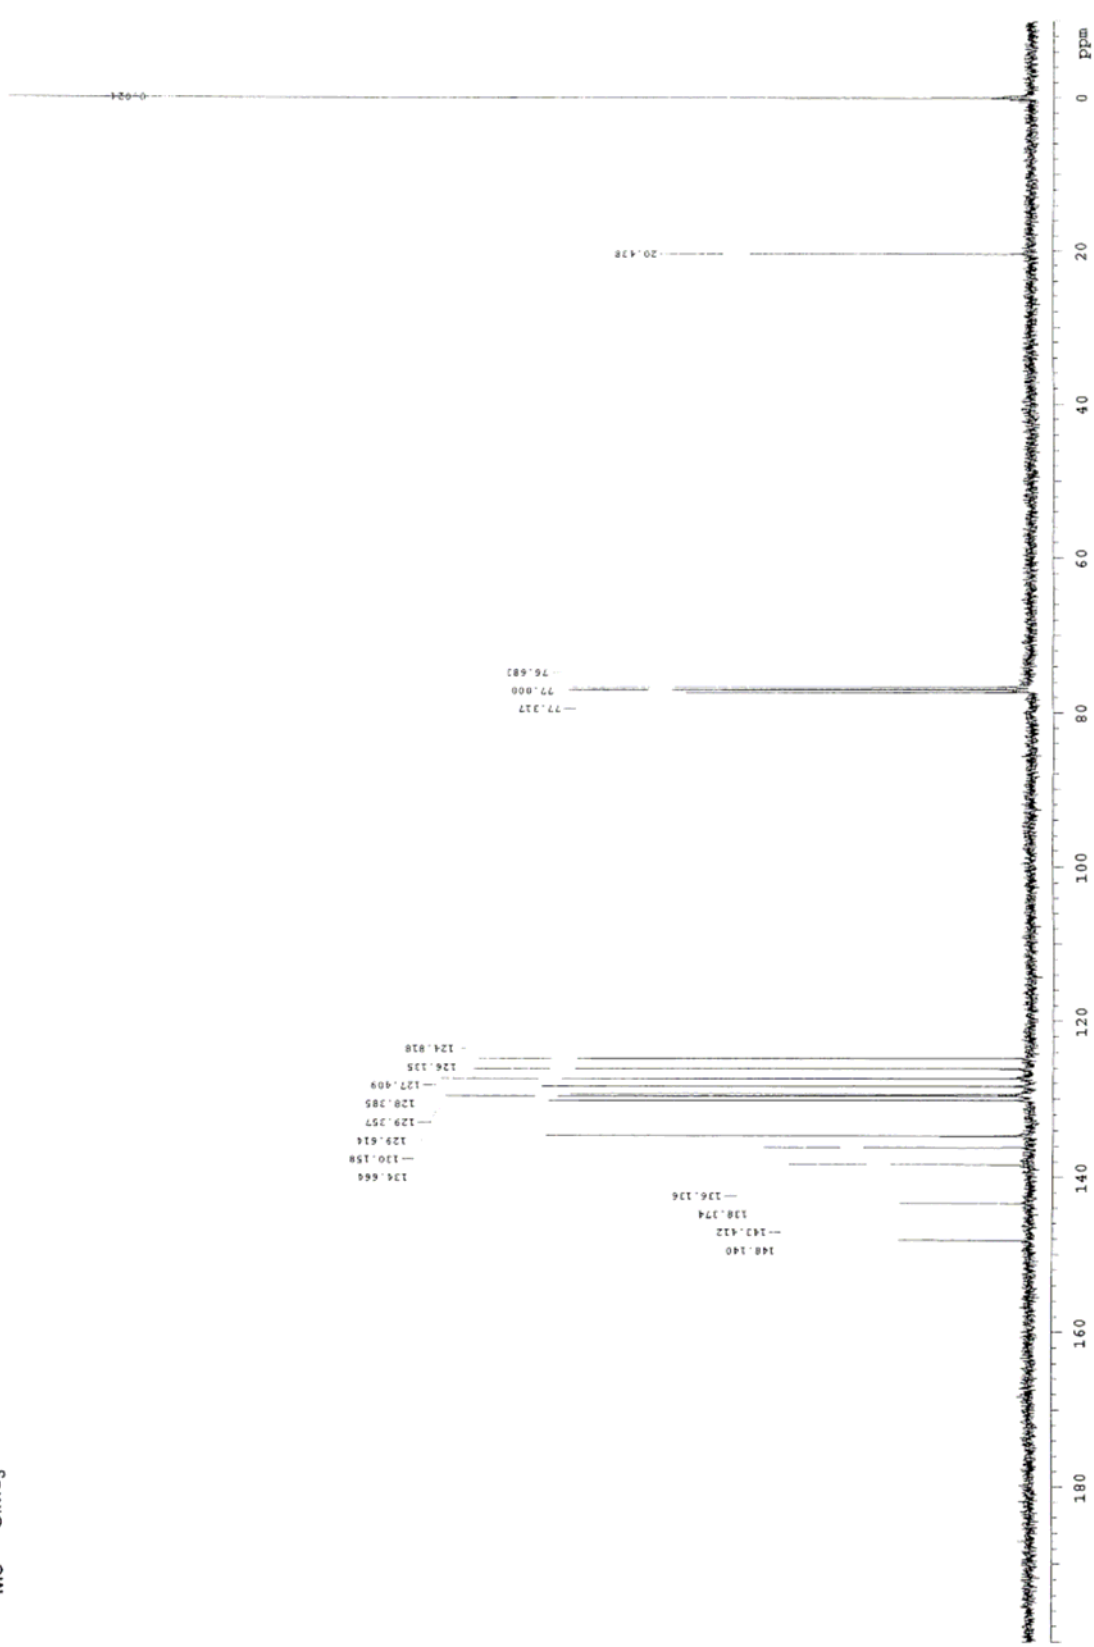

<sup>13</sup>C NMR spectrum of 2-methyl-2'-trimethylsilylbiphenyl (14)

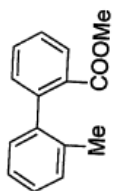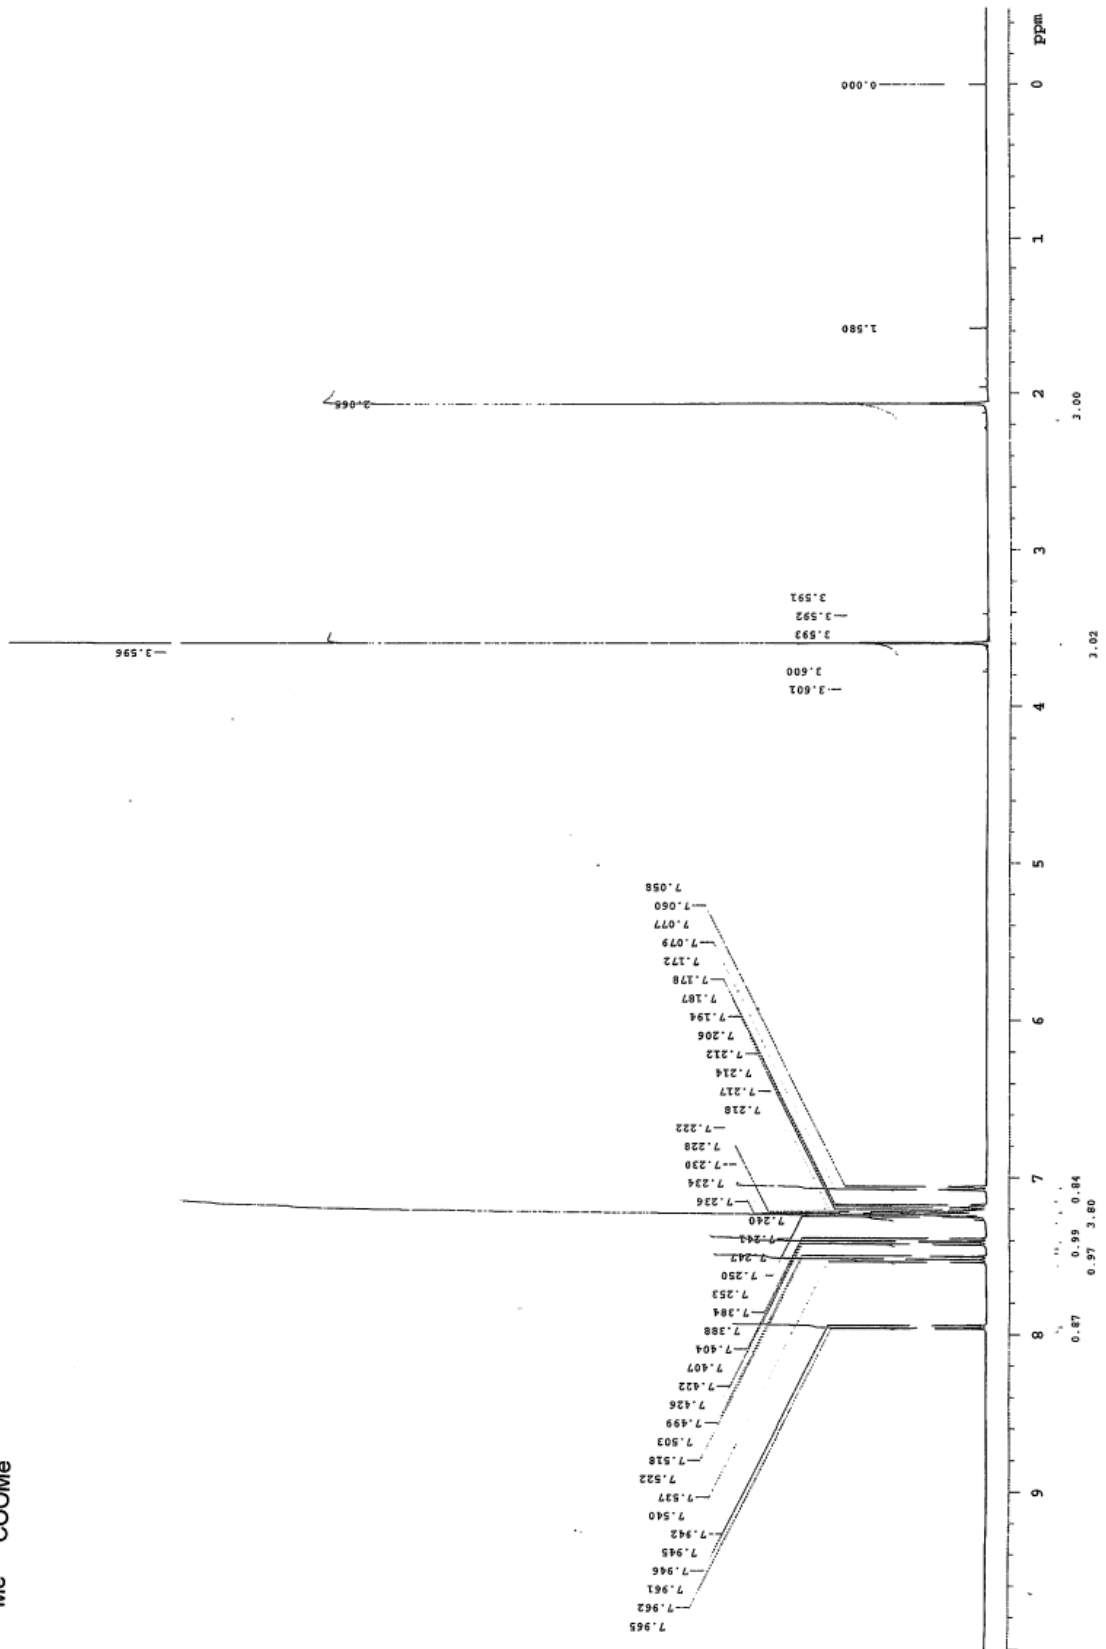

$^1\text{H}$  NMR spectrum of 2-methyl-2'-methoxycarbonylbiphenyl (15)

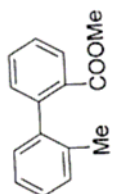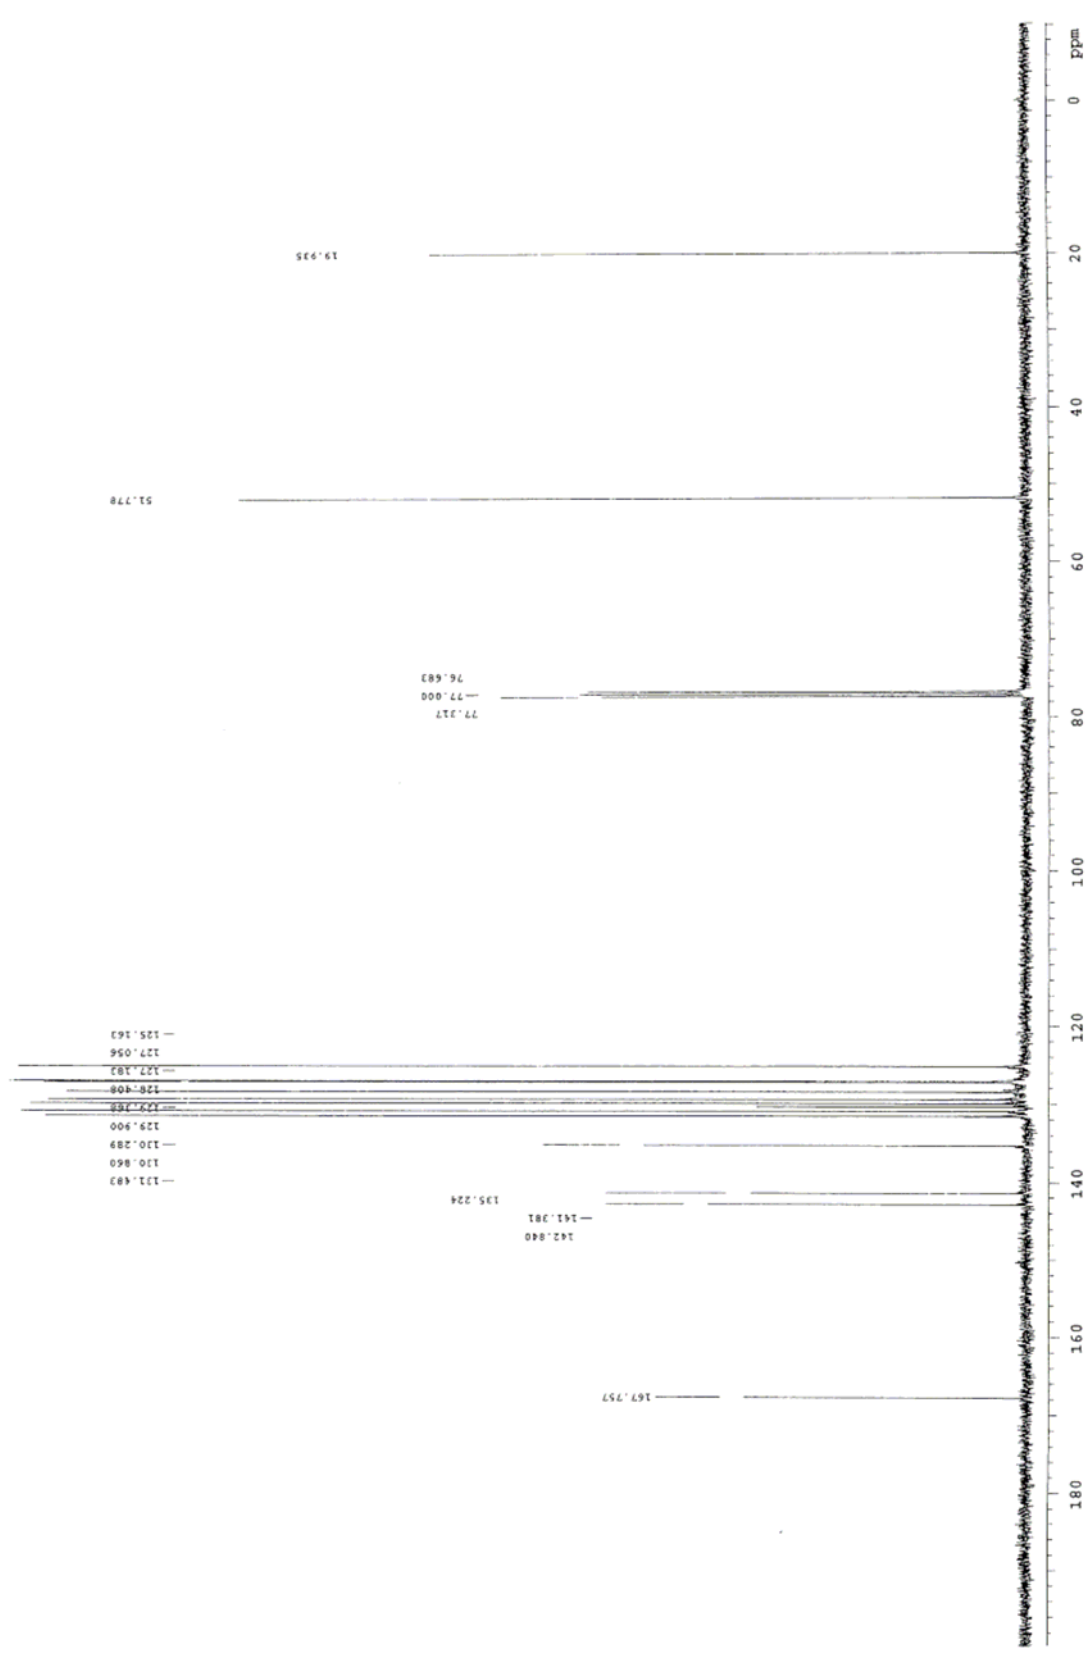

$^{13}\text{C}$  NMR spectrum of 2-methyl-2'-methoxycarbonylbiphenyl (15)

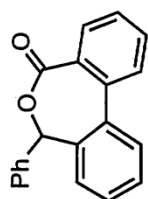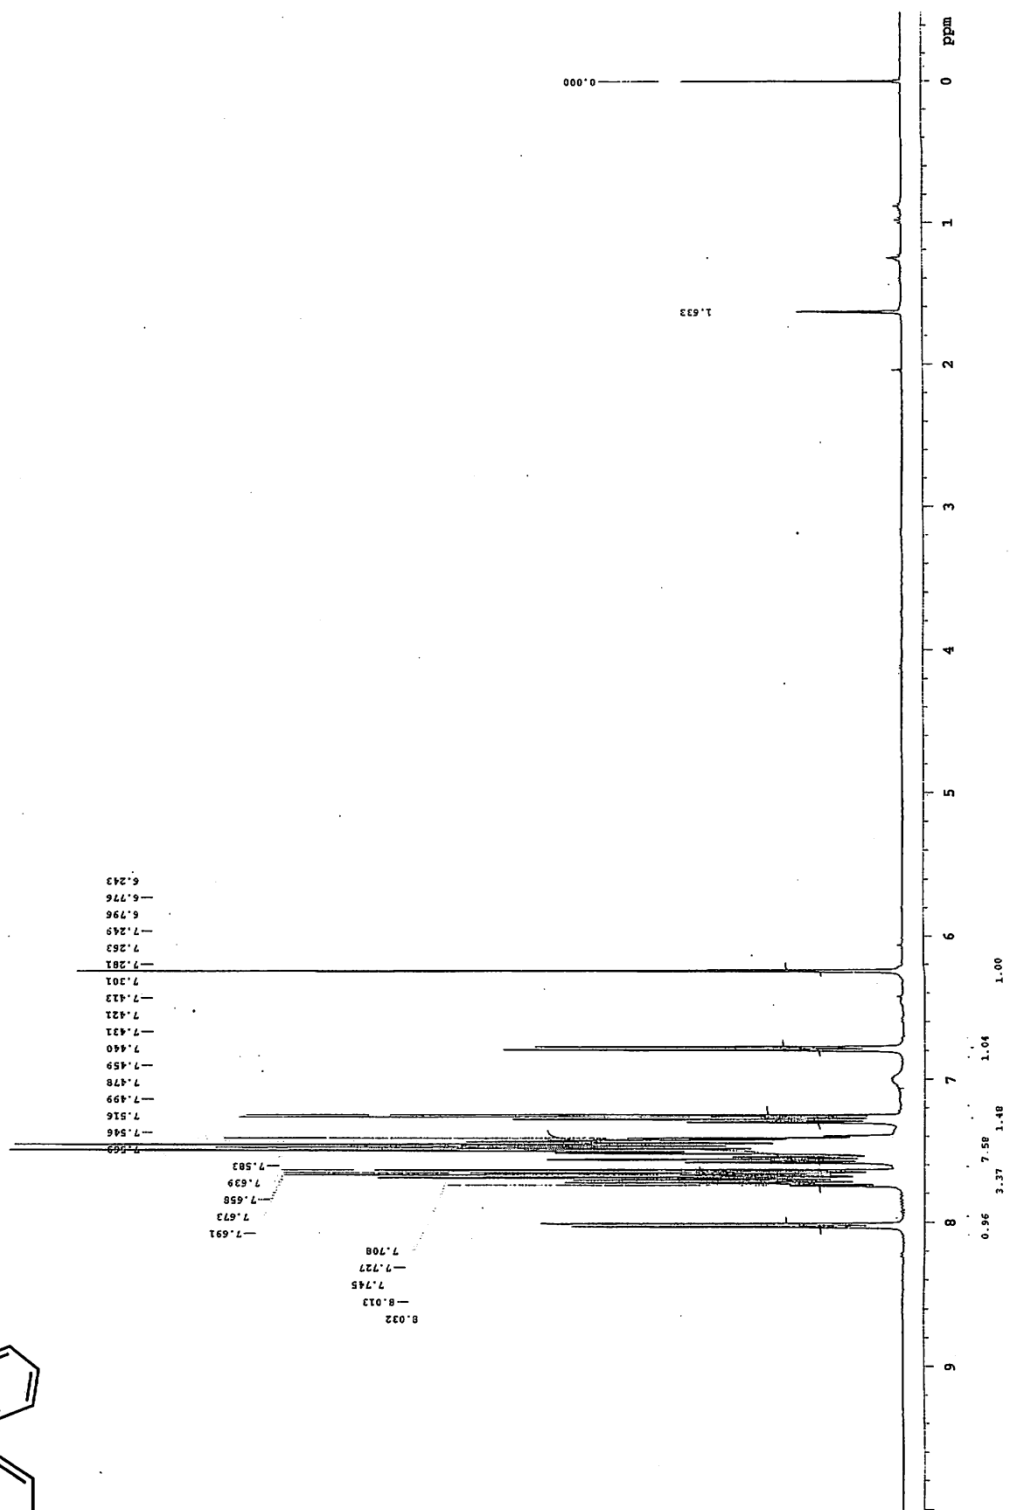

$^1\text{H}$  NMR spectrum of 7-phenyl-5,7-dihydrodibenz[c,e]oxepin-5-one (16)

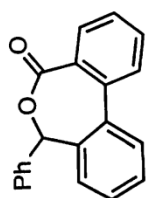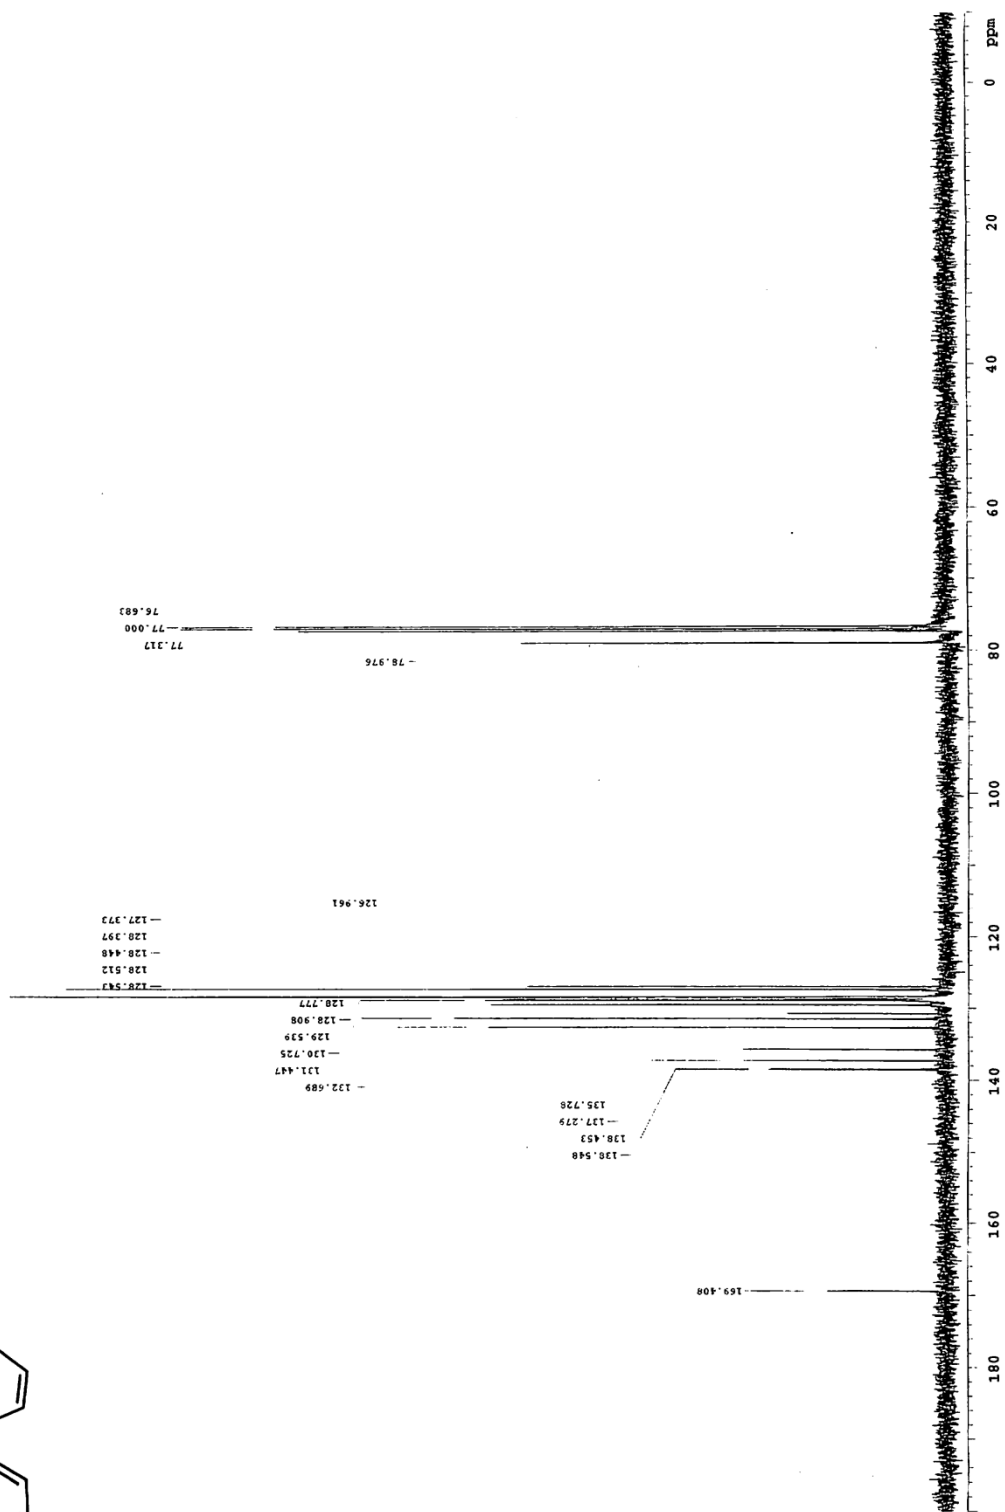

<sup>13</sup>C NMR spectrum of 7-phenyl-5,7-dihydrodibenz[c,e]oxepin-5-one (16)

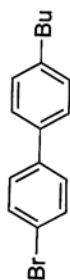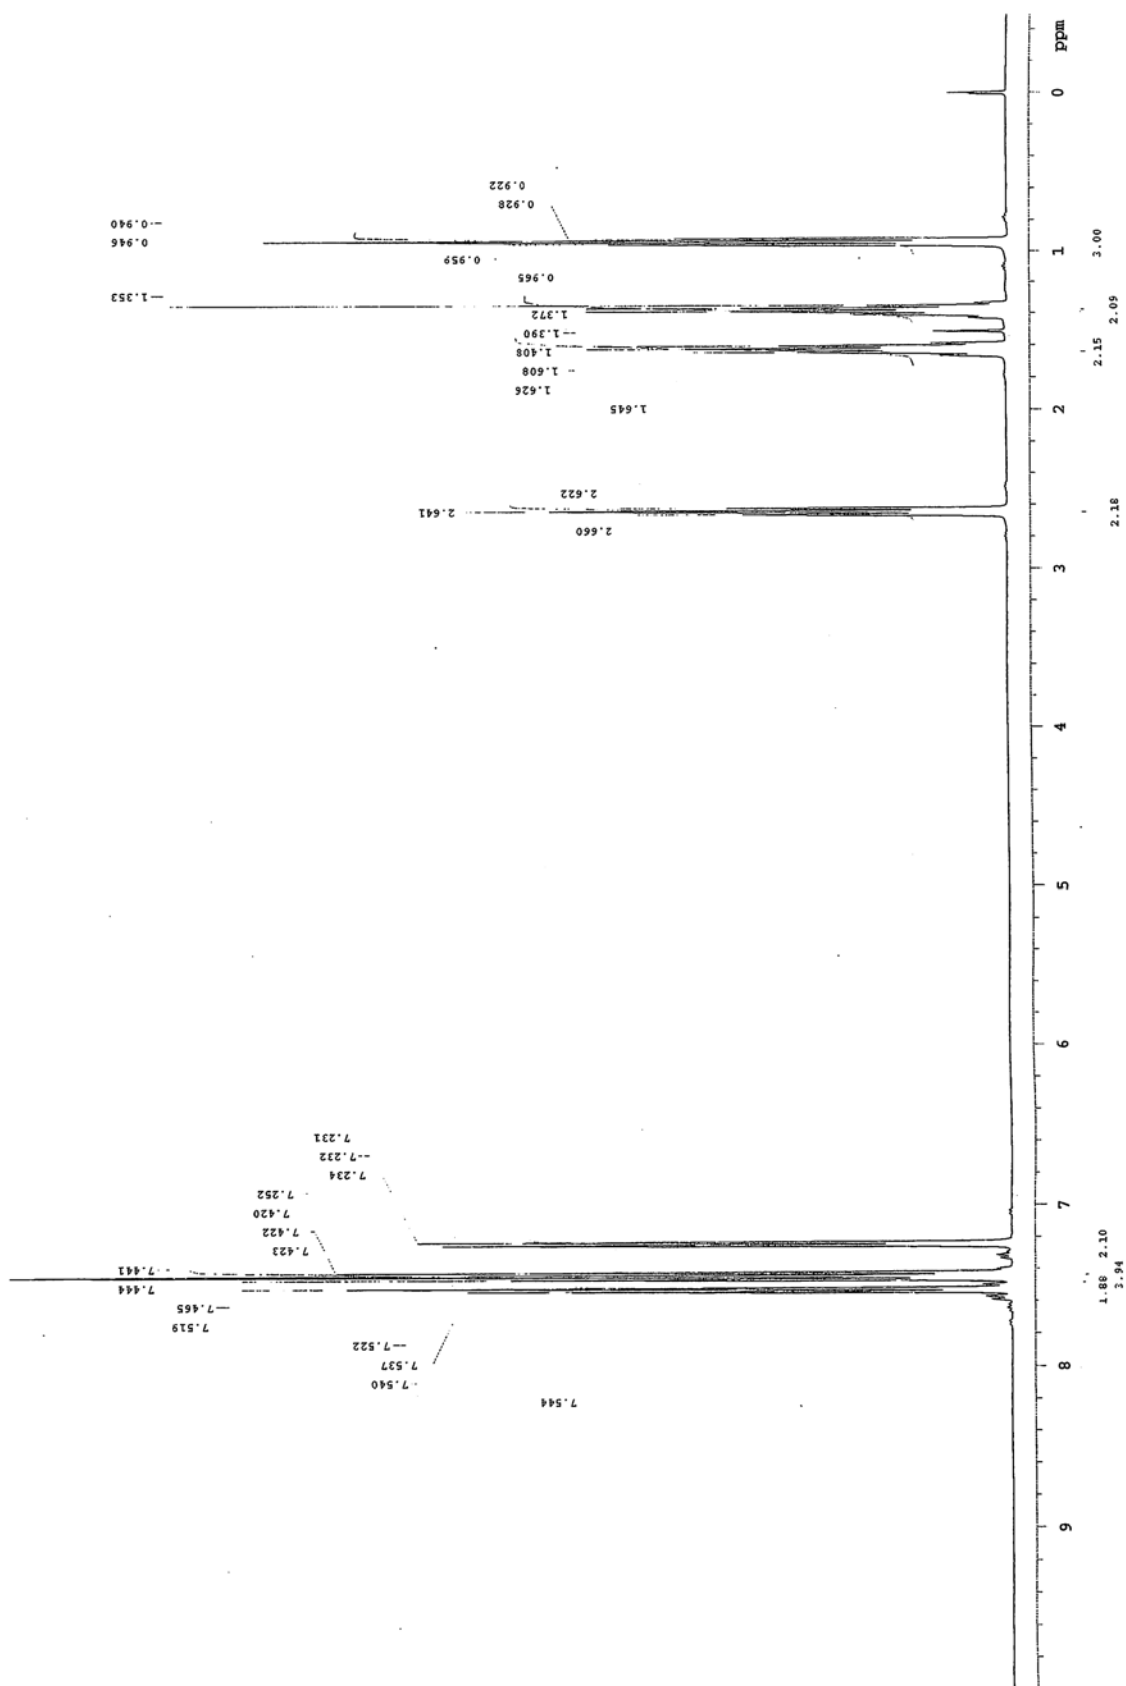

$^1\text{H}$  NMR spectrum of 4-bromo-4'-butylbiphenyl (19)

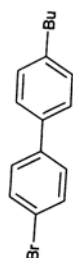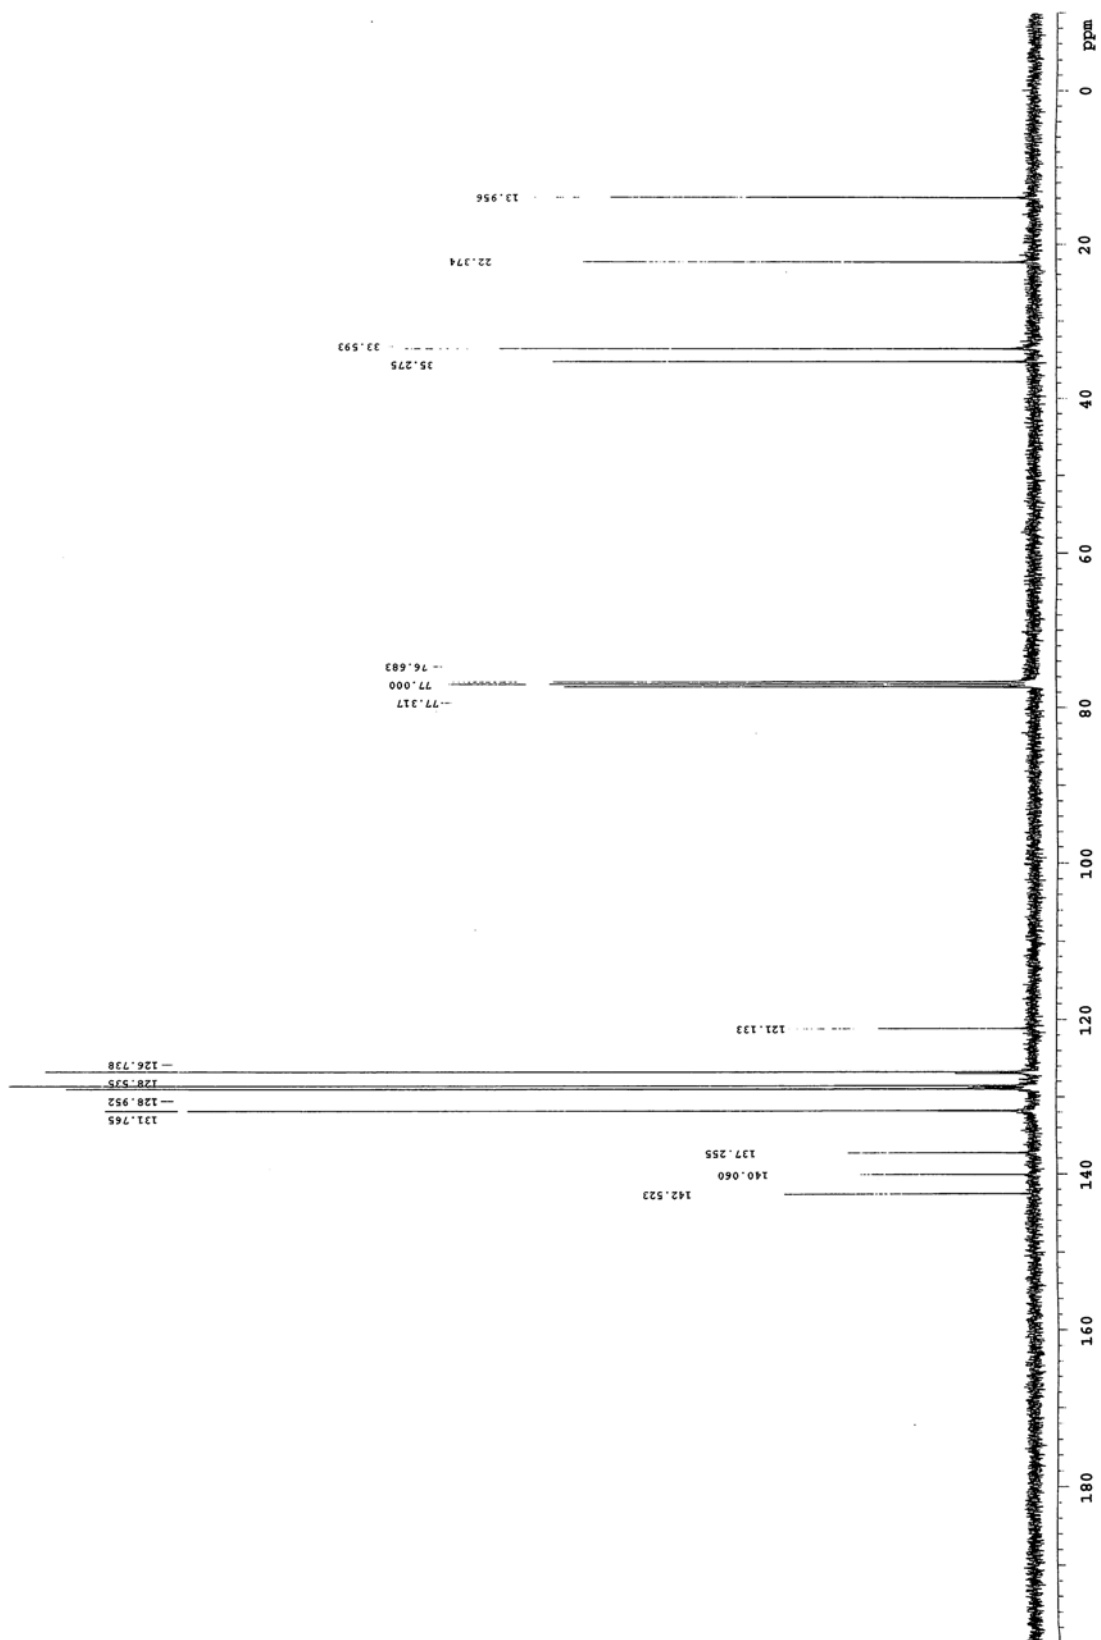

<sup>13</sup>C NMR spectrum of 4-bromo-4'-butylbiphenyl (19)

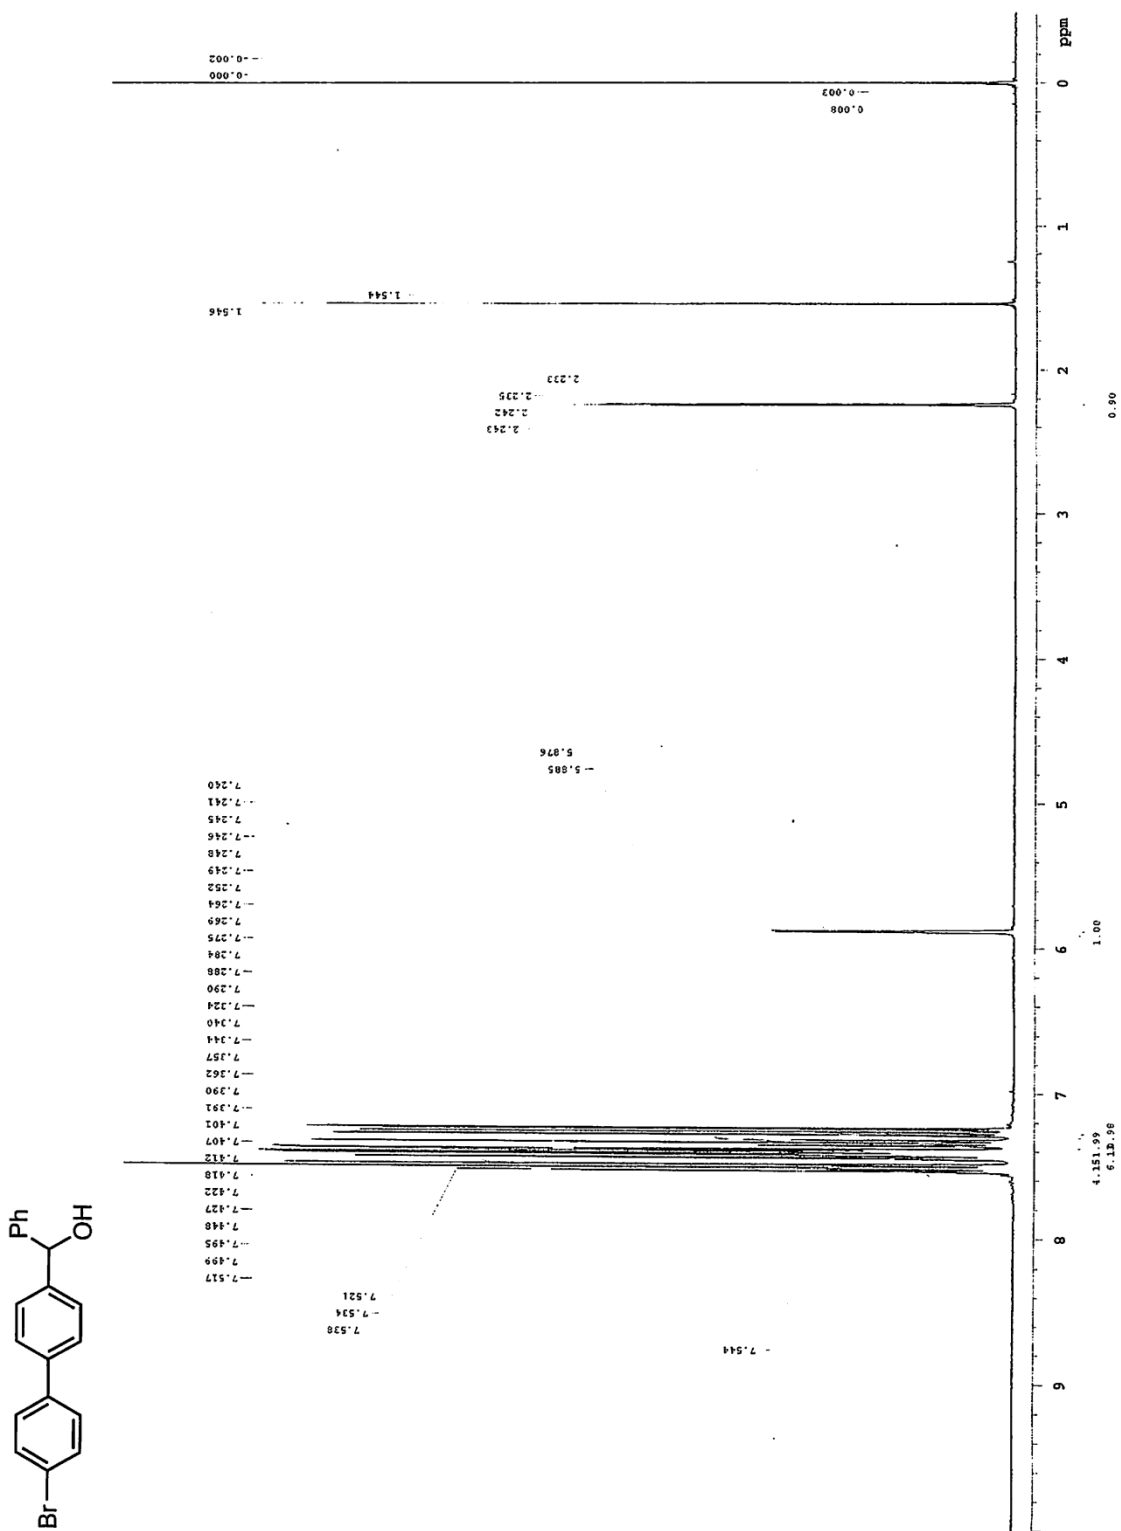

<sup>1</sup>H NMR spectrum of 4-bromo-4'-[hydroxyl(phenyl)methyl]biphenyl (22)



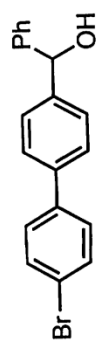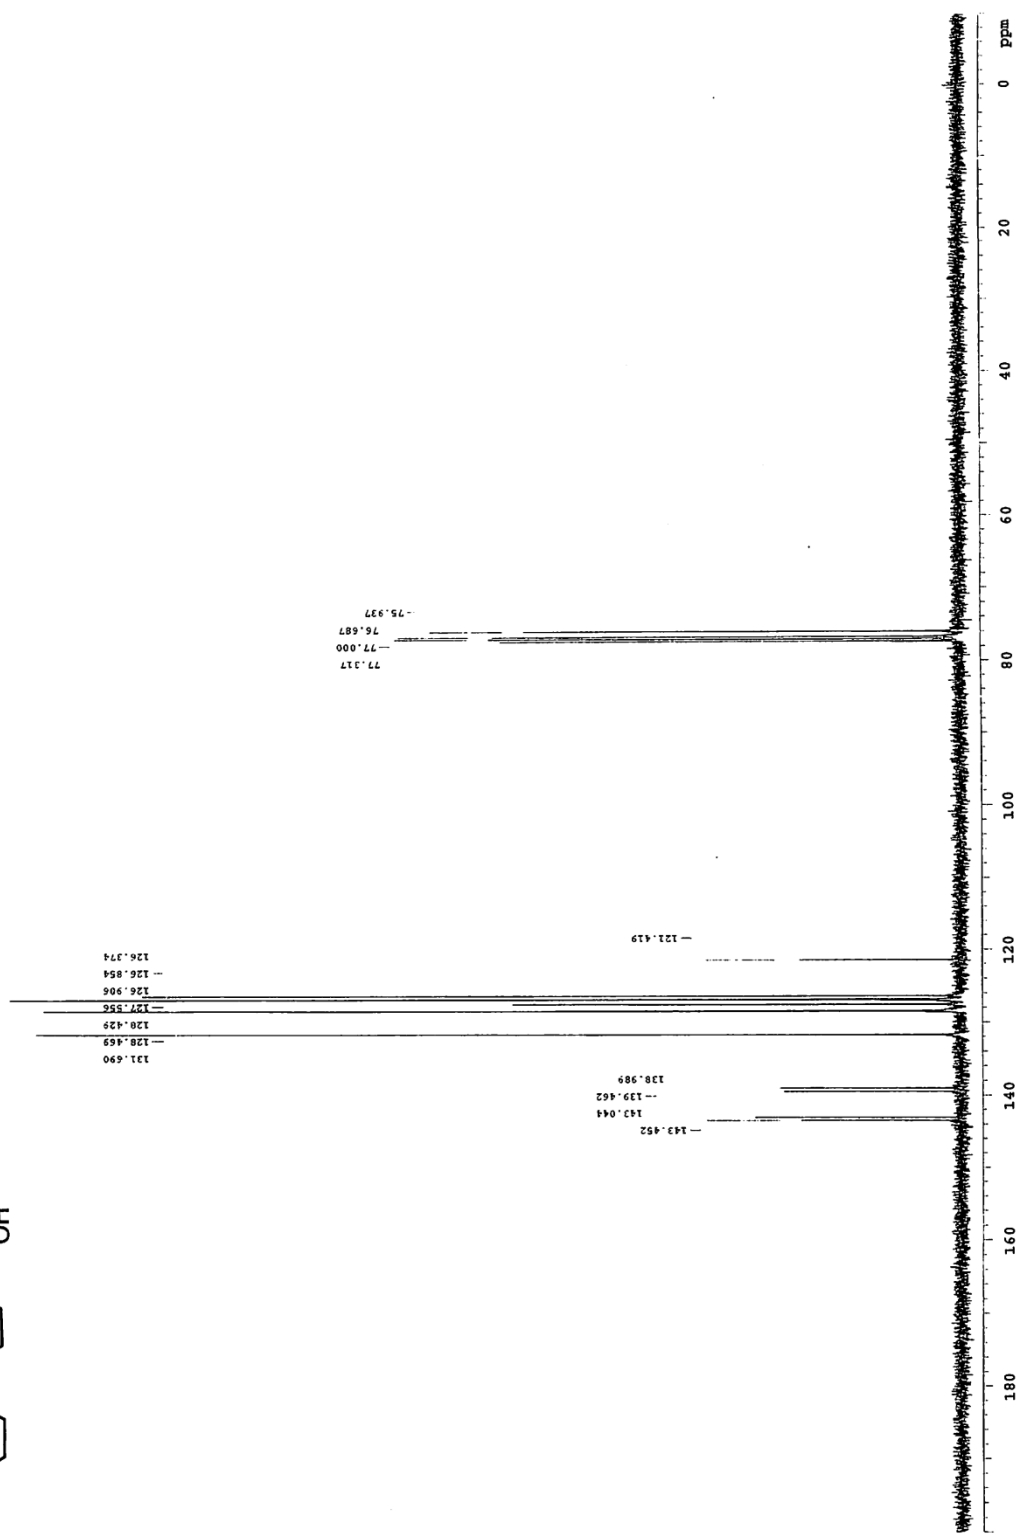

<sup>13</sup>C NMR spectrum of 4-bromo-4'-[hydroxyl(phenyl)methyl]biphenyl (22)

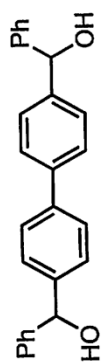

<sup>1</sup>H NMR spectrum of 4,4'-di[hydroxyl(phenyl)methyl]biphenyl (23)

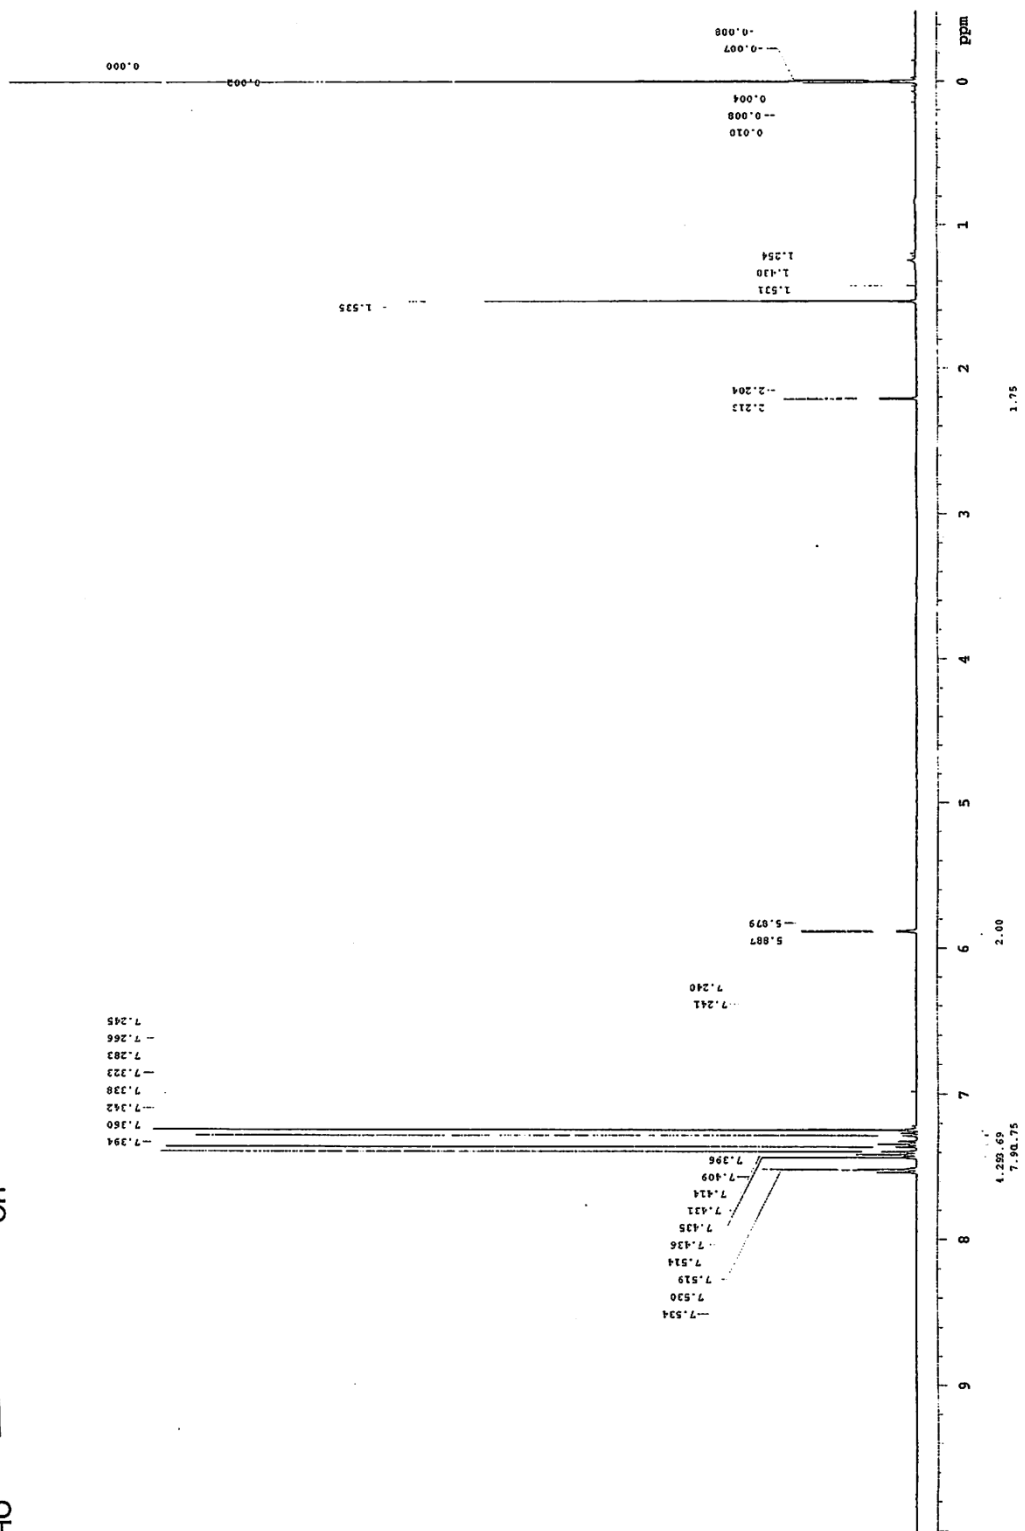

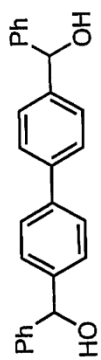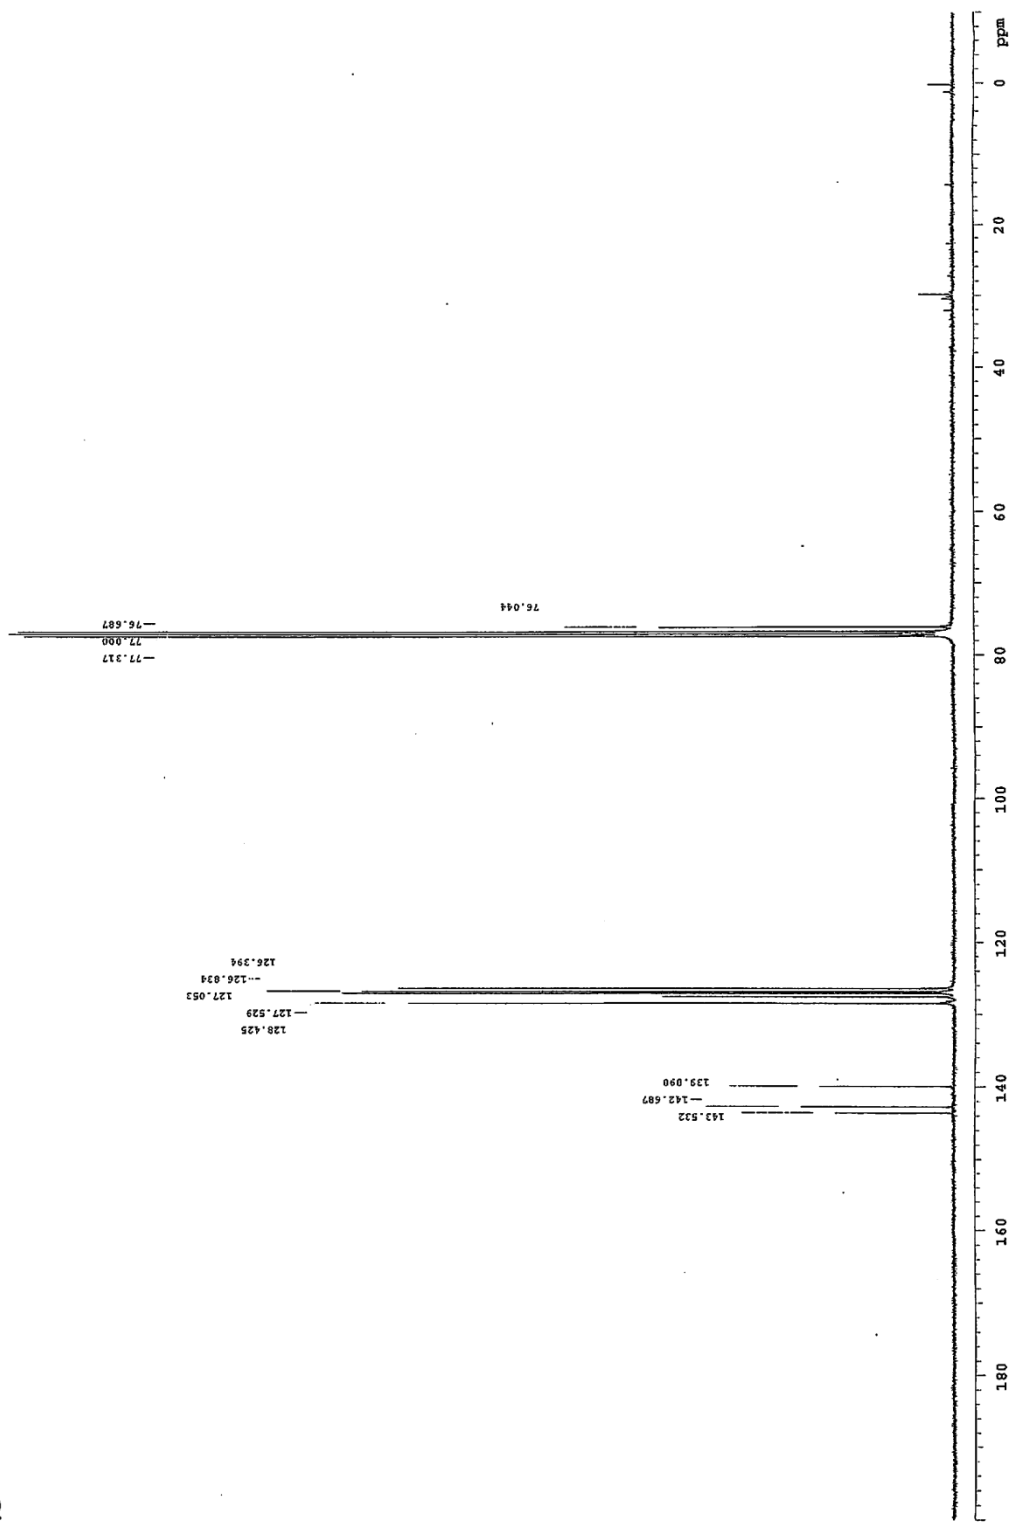

<sup>13</sup>C NMR spectrum of 4,4'-di[hydroxyl(phenyl)methyl]biphenyl (23)

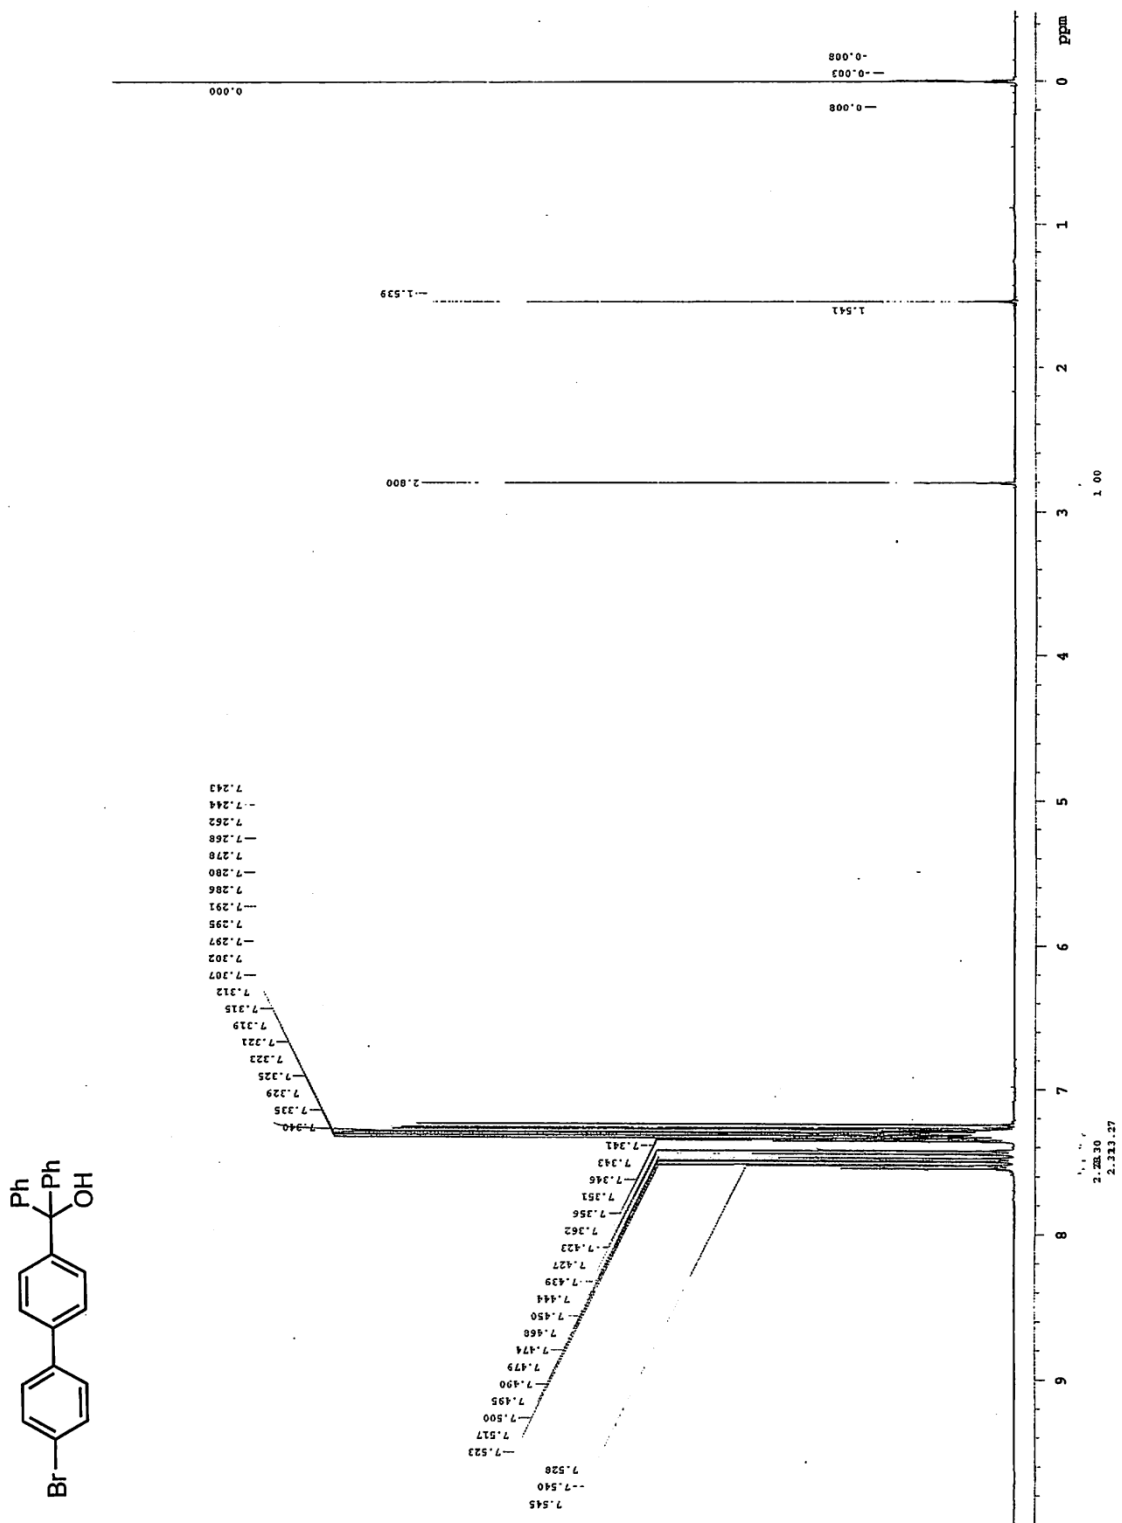

<sup>1</sup>H NMR spectrum of 4-bromo-4'-[hydroxyl(diphenyl)methyl]biphenyl (24)

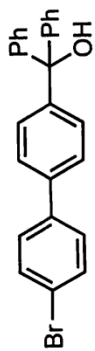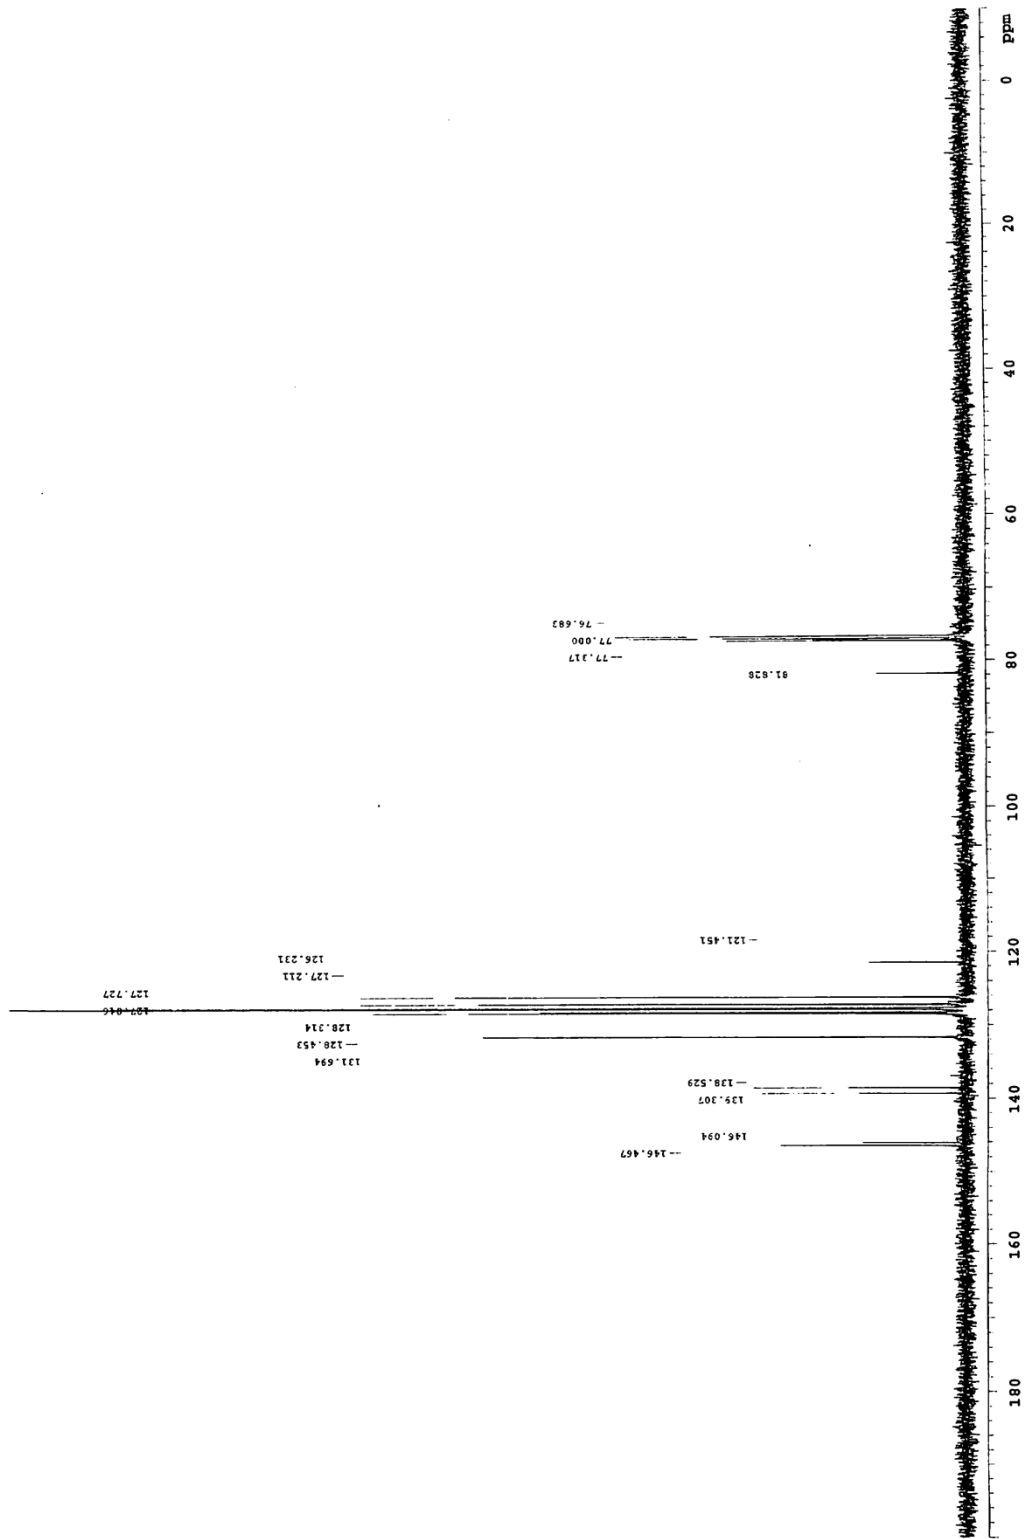

<sup>13</sup>C NMR spectrum of 4-bromo-4'-[hydroxyl(diphenyl)methyl]biphenyl (24)

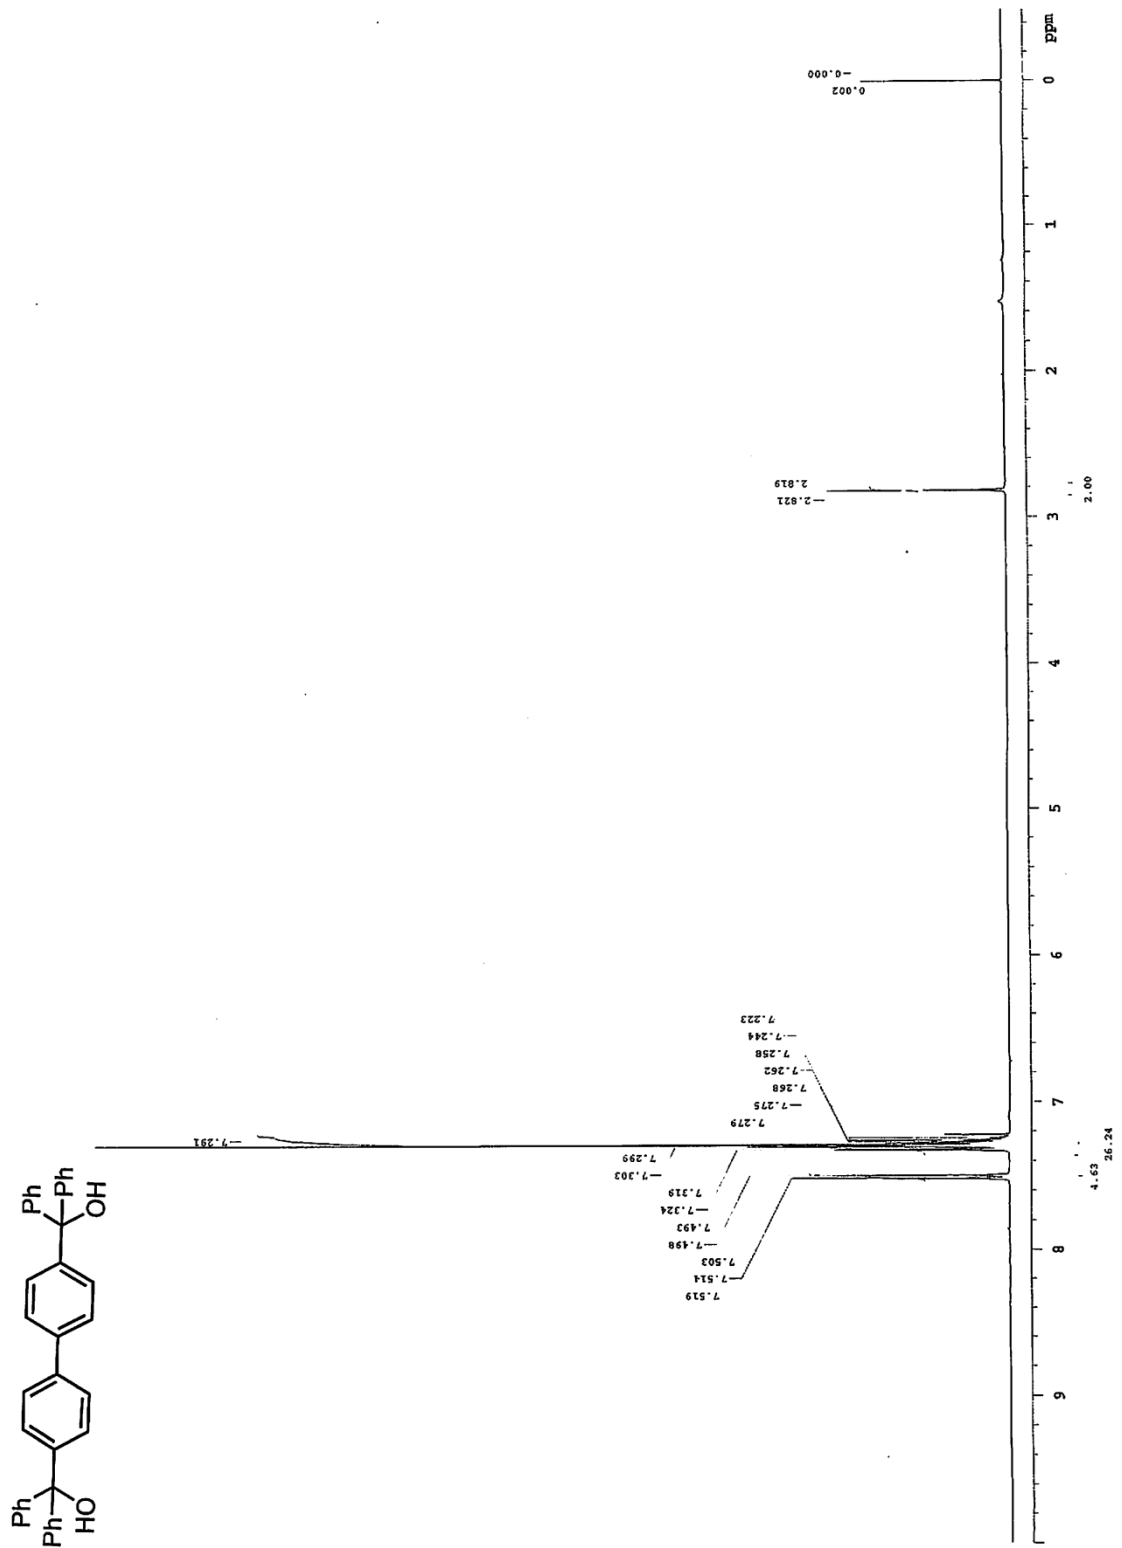

<sup>1</sup>H NMR spectrum of 4,4'-bis[hydroxyl(diphenyl)methyl]biphenyl (25)

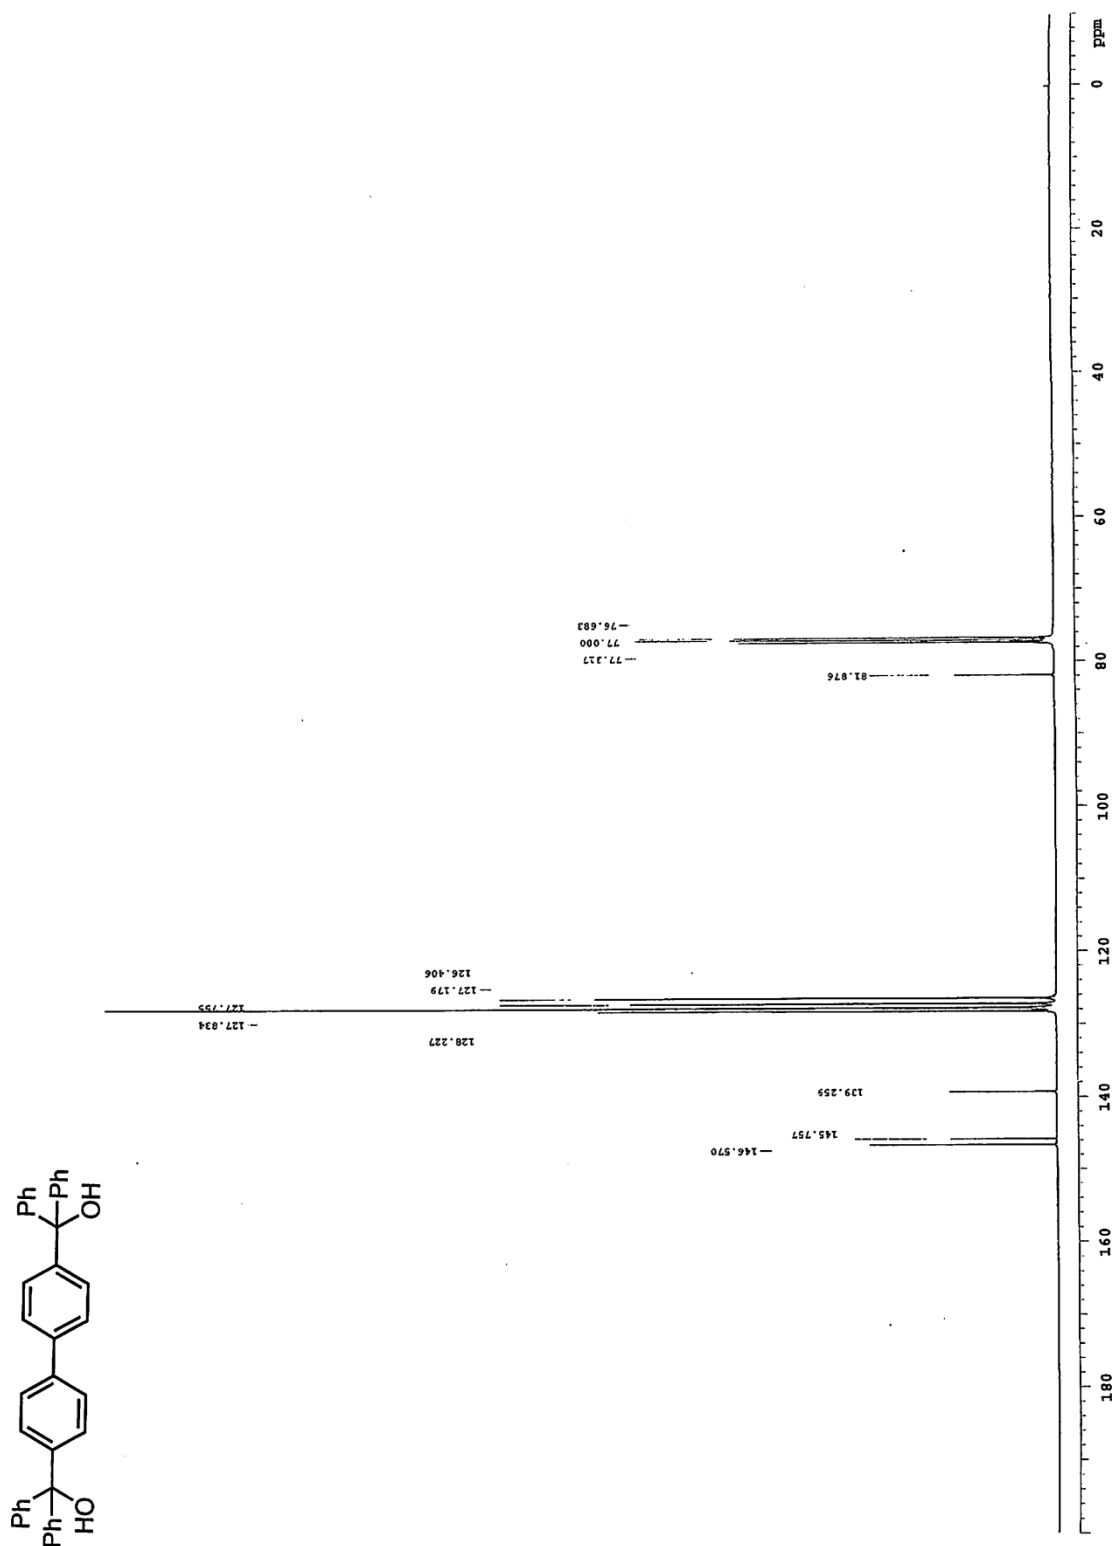

<sup>13</sup>C NMR spectrum of 4,4'-bis[hydroxyl(diphenyl)methyl]biphenyl (25)

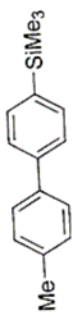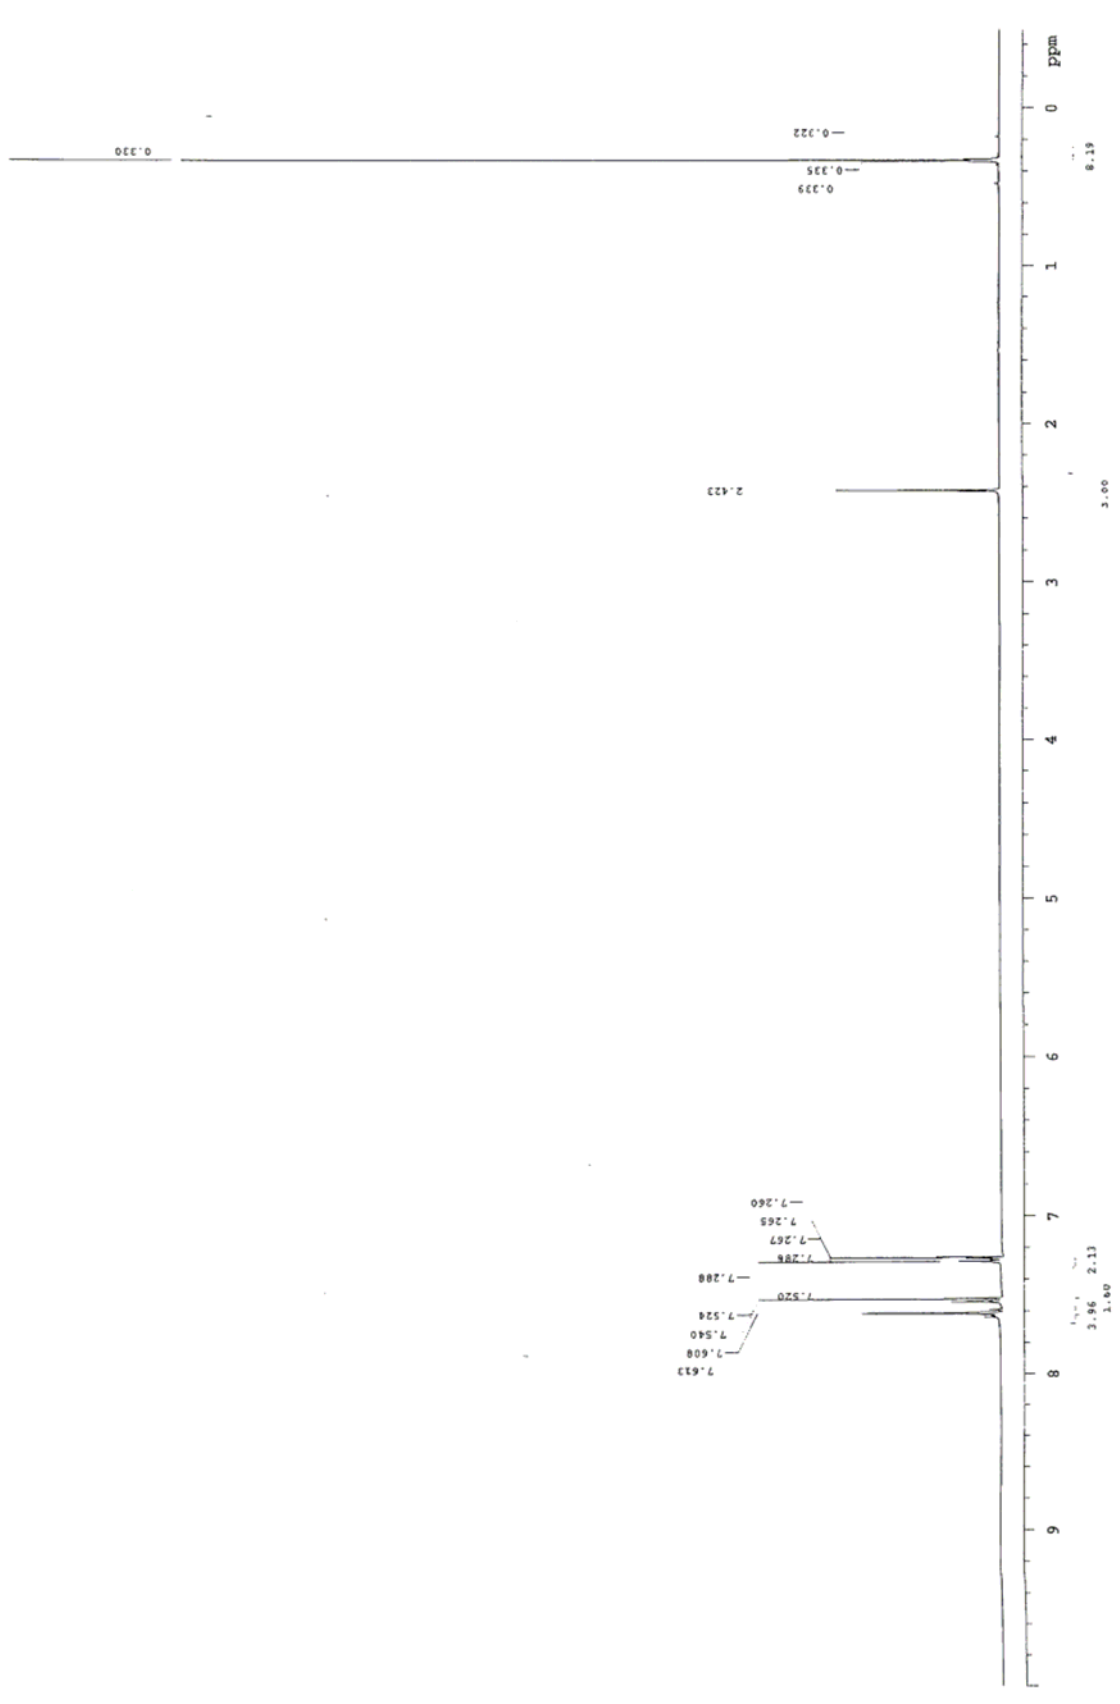

<sup>1</sup>H NMR spectrum of 4-methyl-4'-trimethylsilylbiphenyl (26)



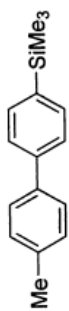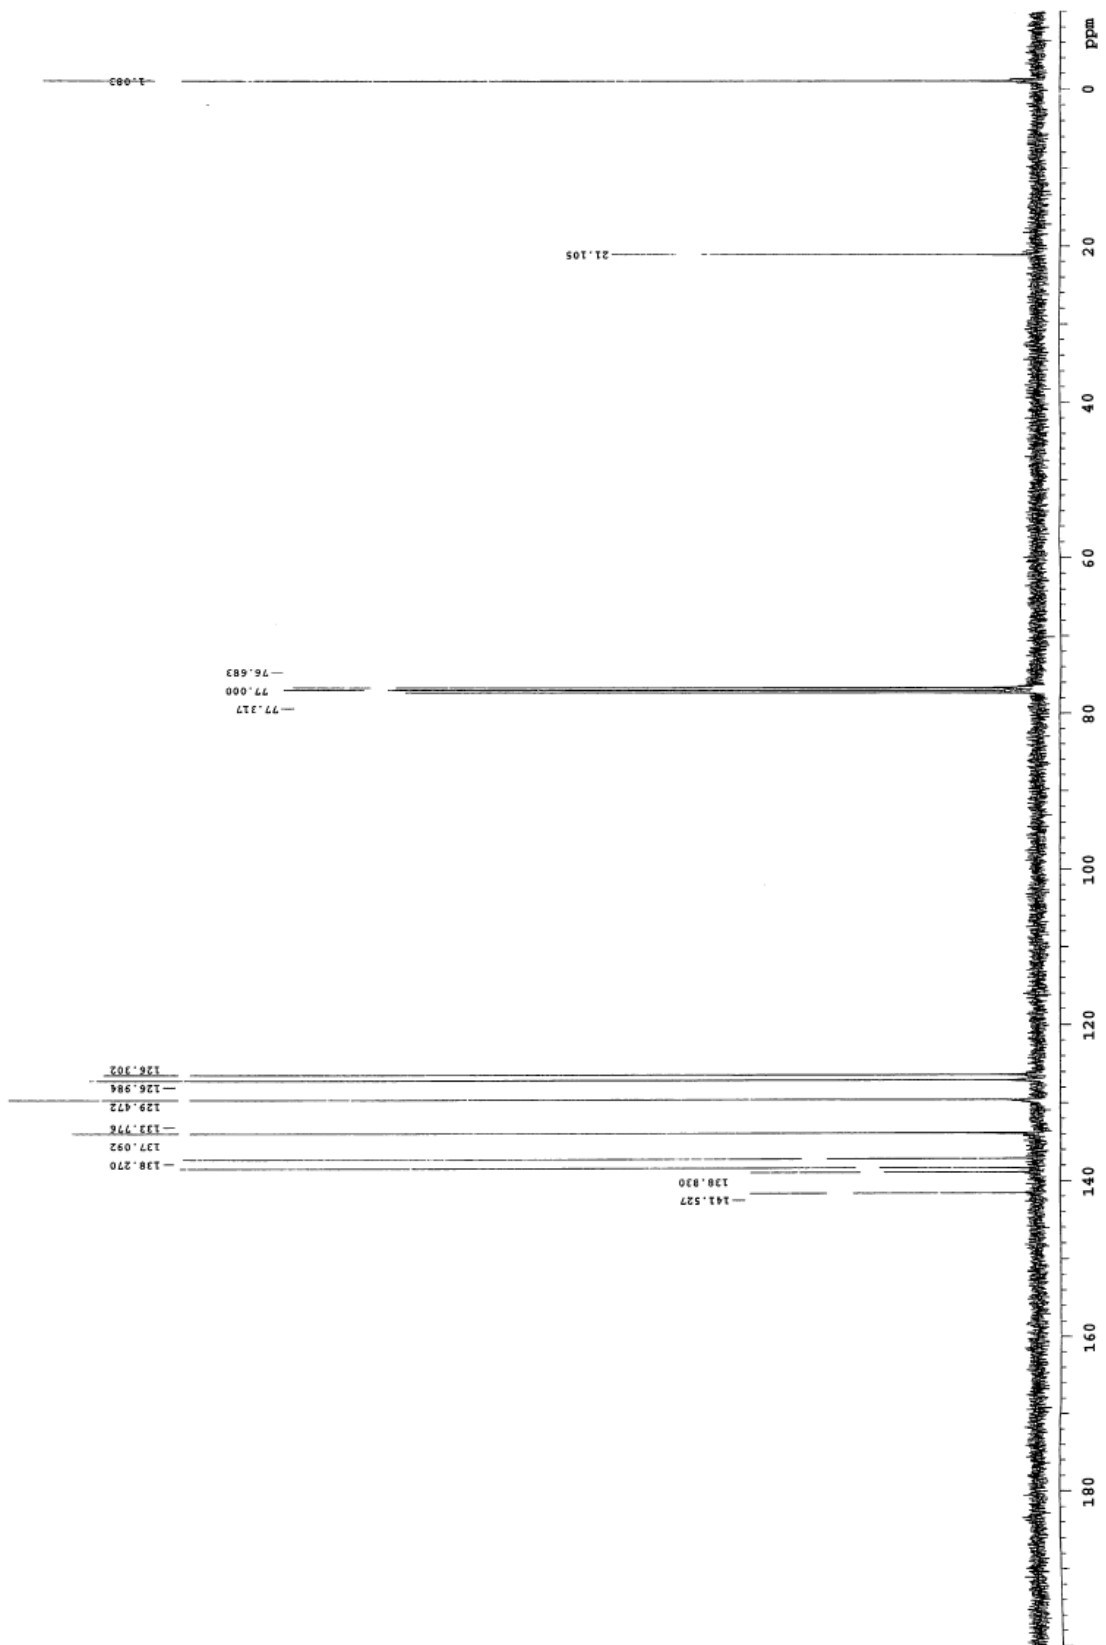

<sup>13</sup>C NMR spectrum of 4-methyl-4'-trimethylsilylbiphenyl (26)

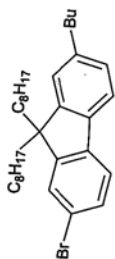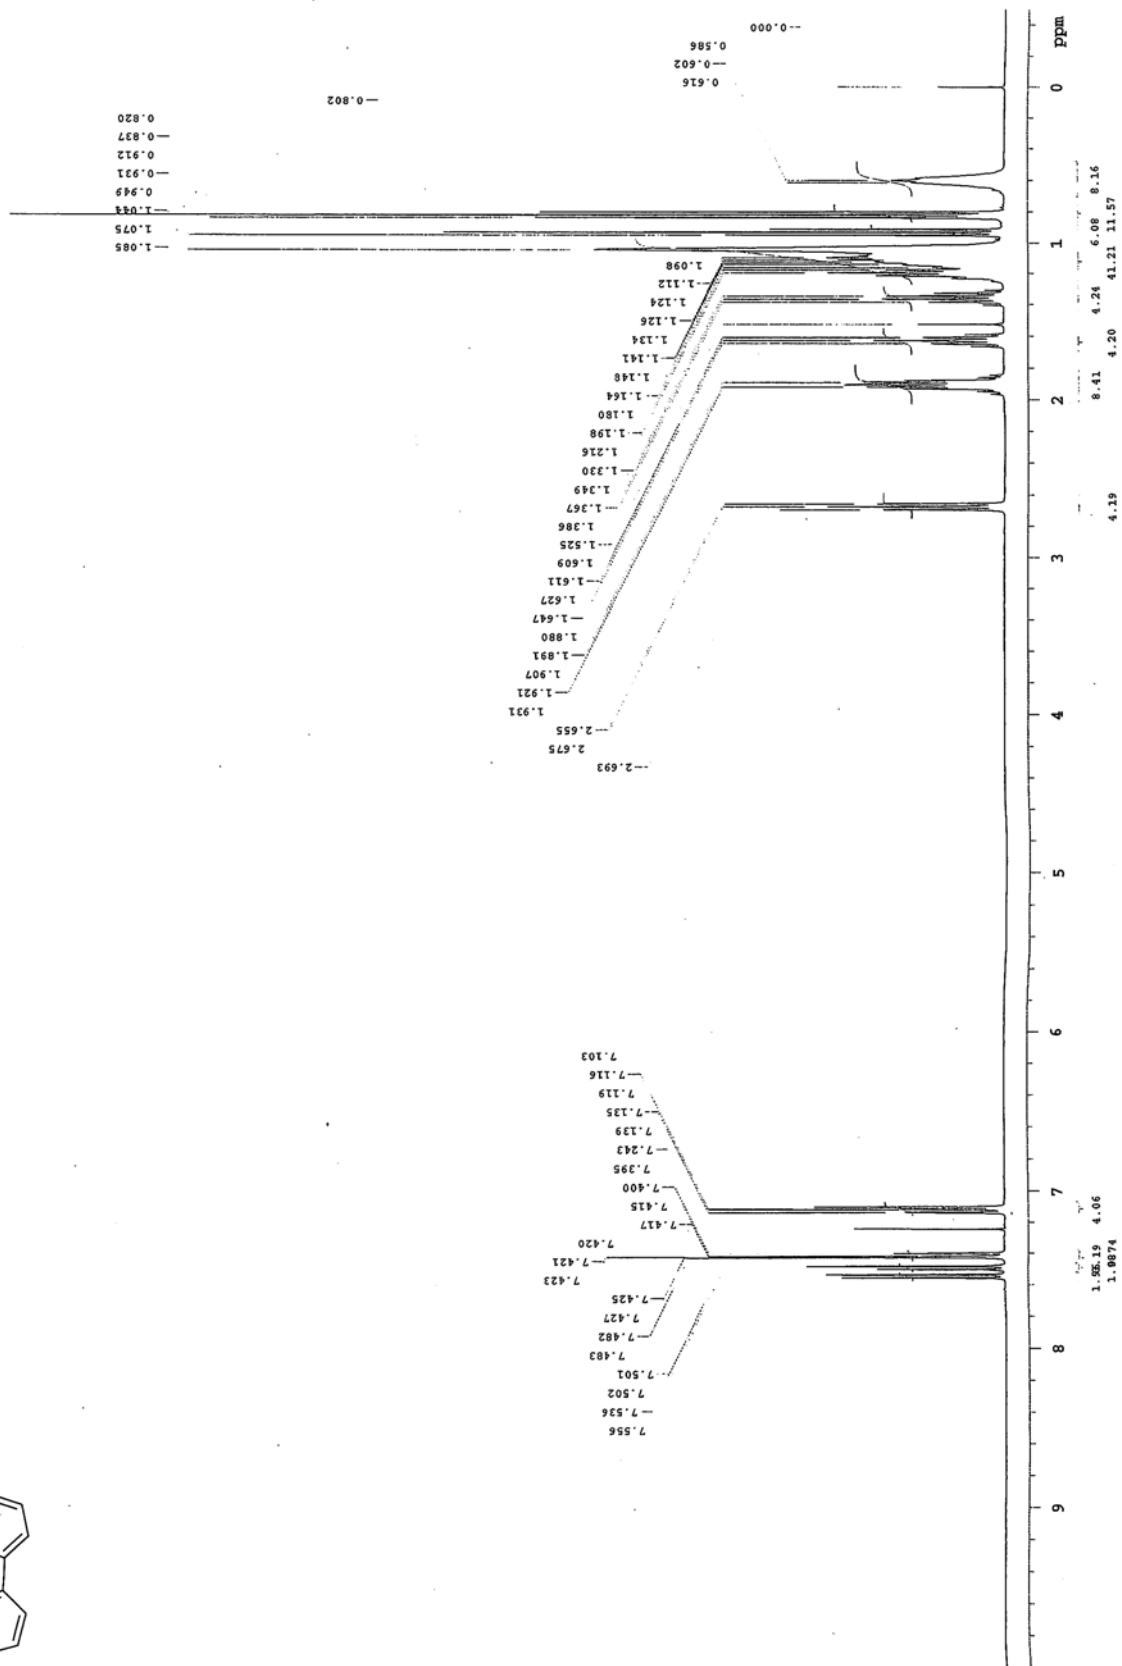

<sup>1</sup>H NMR spectrum of 2-bromo-7-butyl-9,9-dioctylfluorene (31)

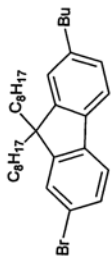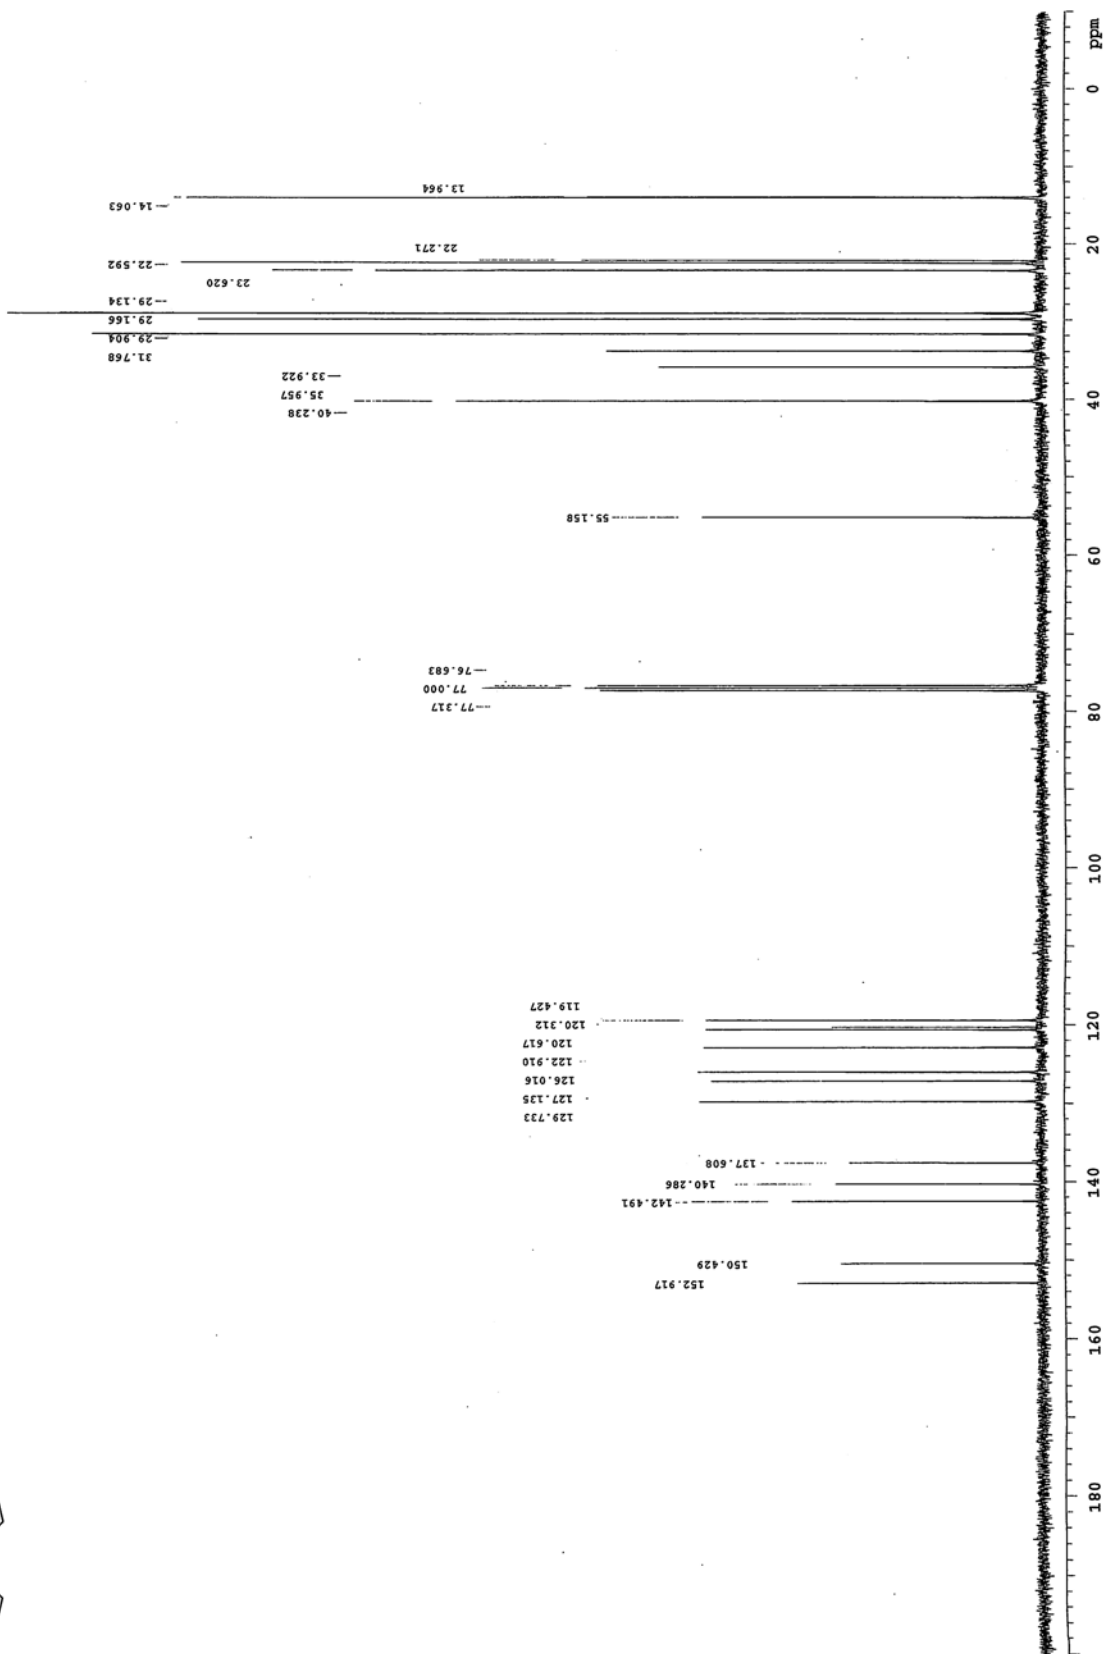

$^{13}\text{C}$  NMR spectrum of 2-bromo-7-butyl-9,9-dioctylfluorene (31)

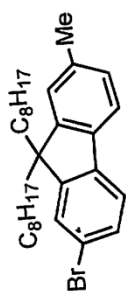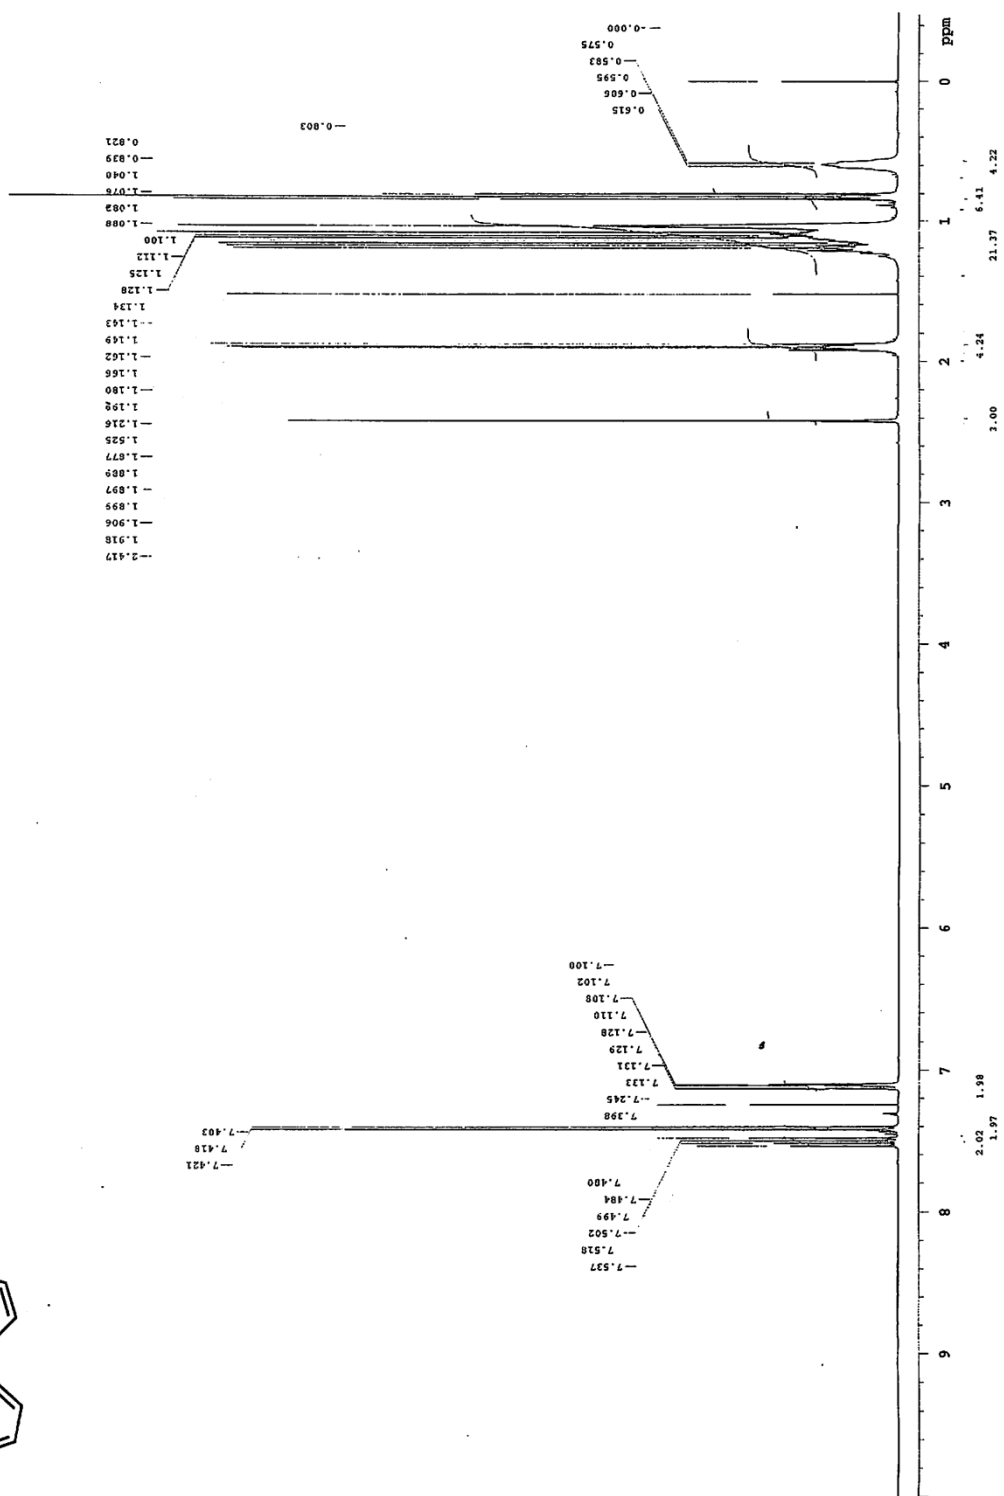

$^1\text{H}$  NMR spectrum of 2-bromo-7-methyl-9,9-dioctylfluorene (32)

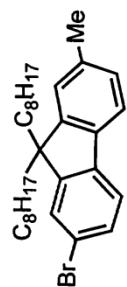

$^{13}\text{C}$  NMR spectrum of 2-bromo-7-methyl-9,9-dioctylfluorene (32)

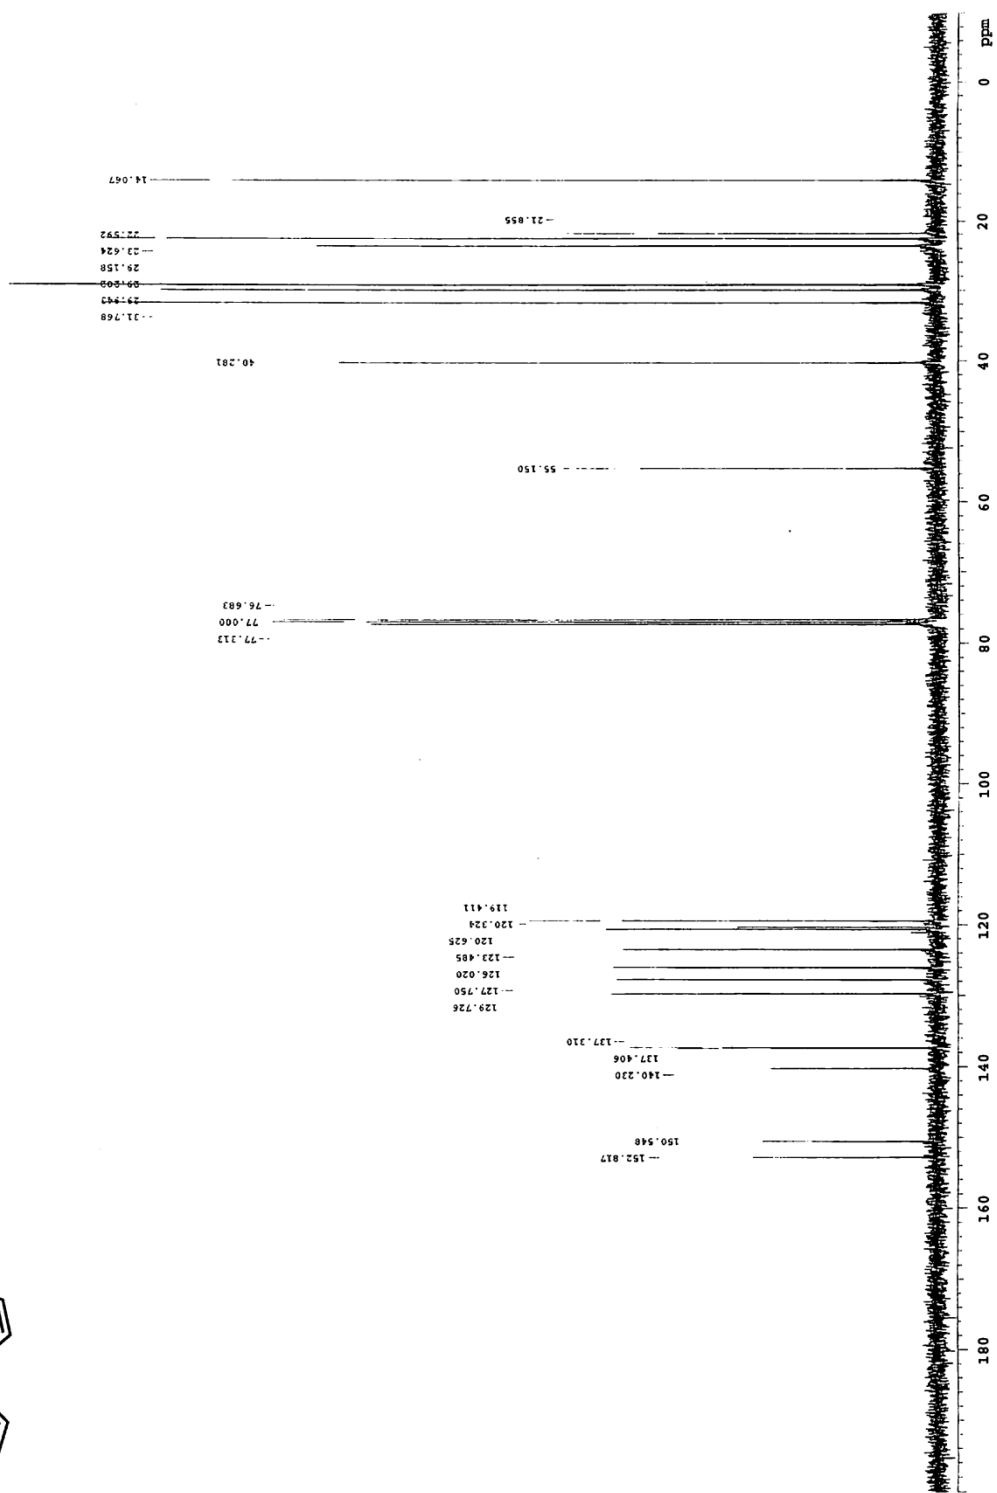

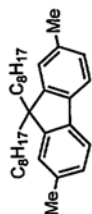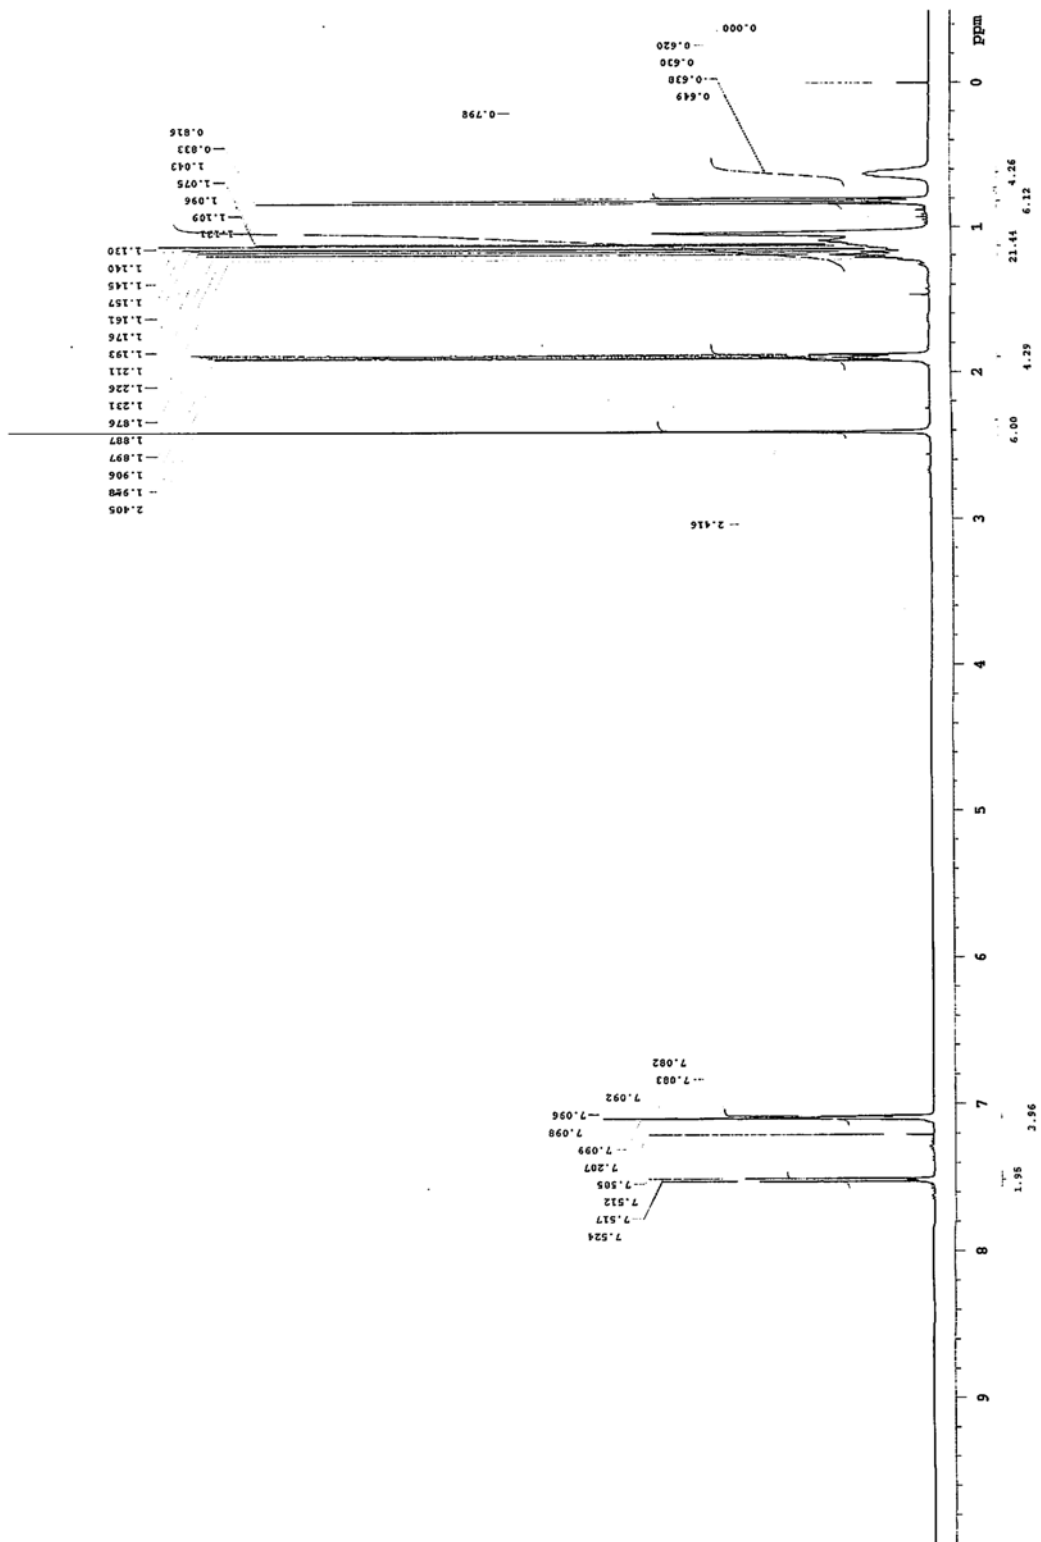

$^1\text{H}$  NMR spectrum of 2,7-dimethyl-9,9-dioctylfluorene (33)

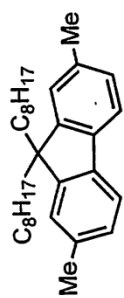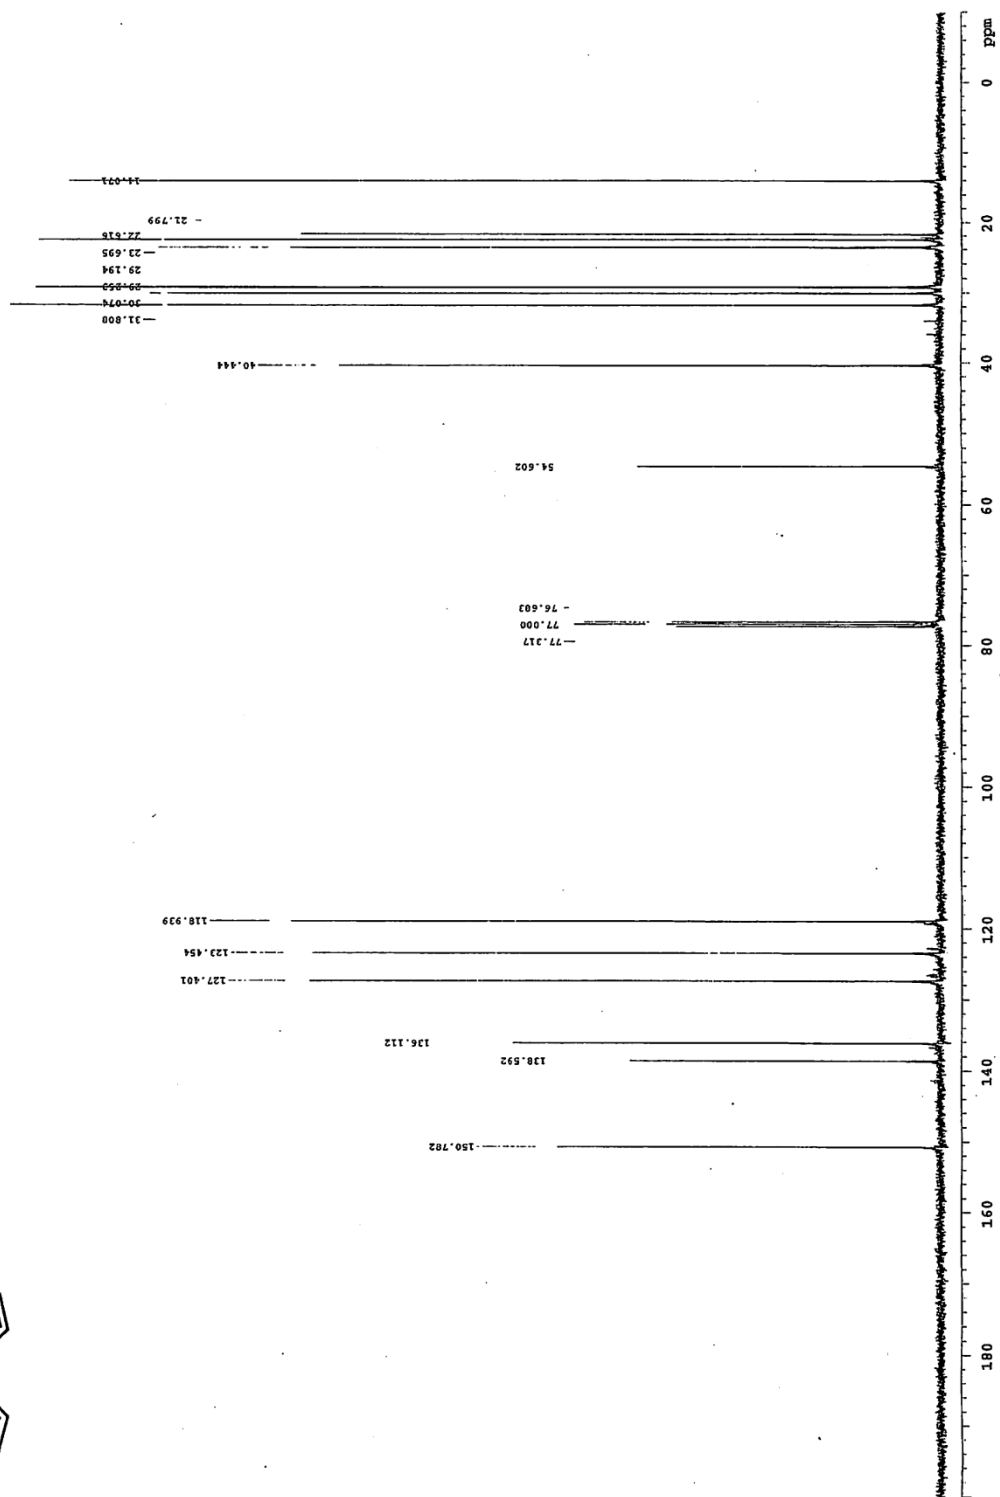

$^{13}\text{C}$  NMR spectrum of 2,7-dimethyl-9,9-dioctylfluorene (33)

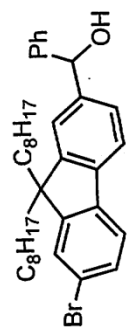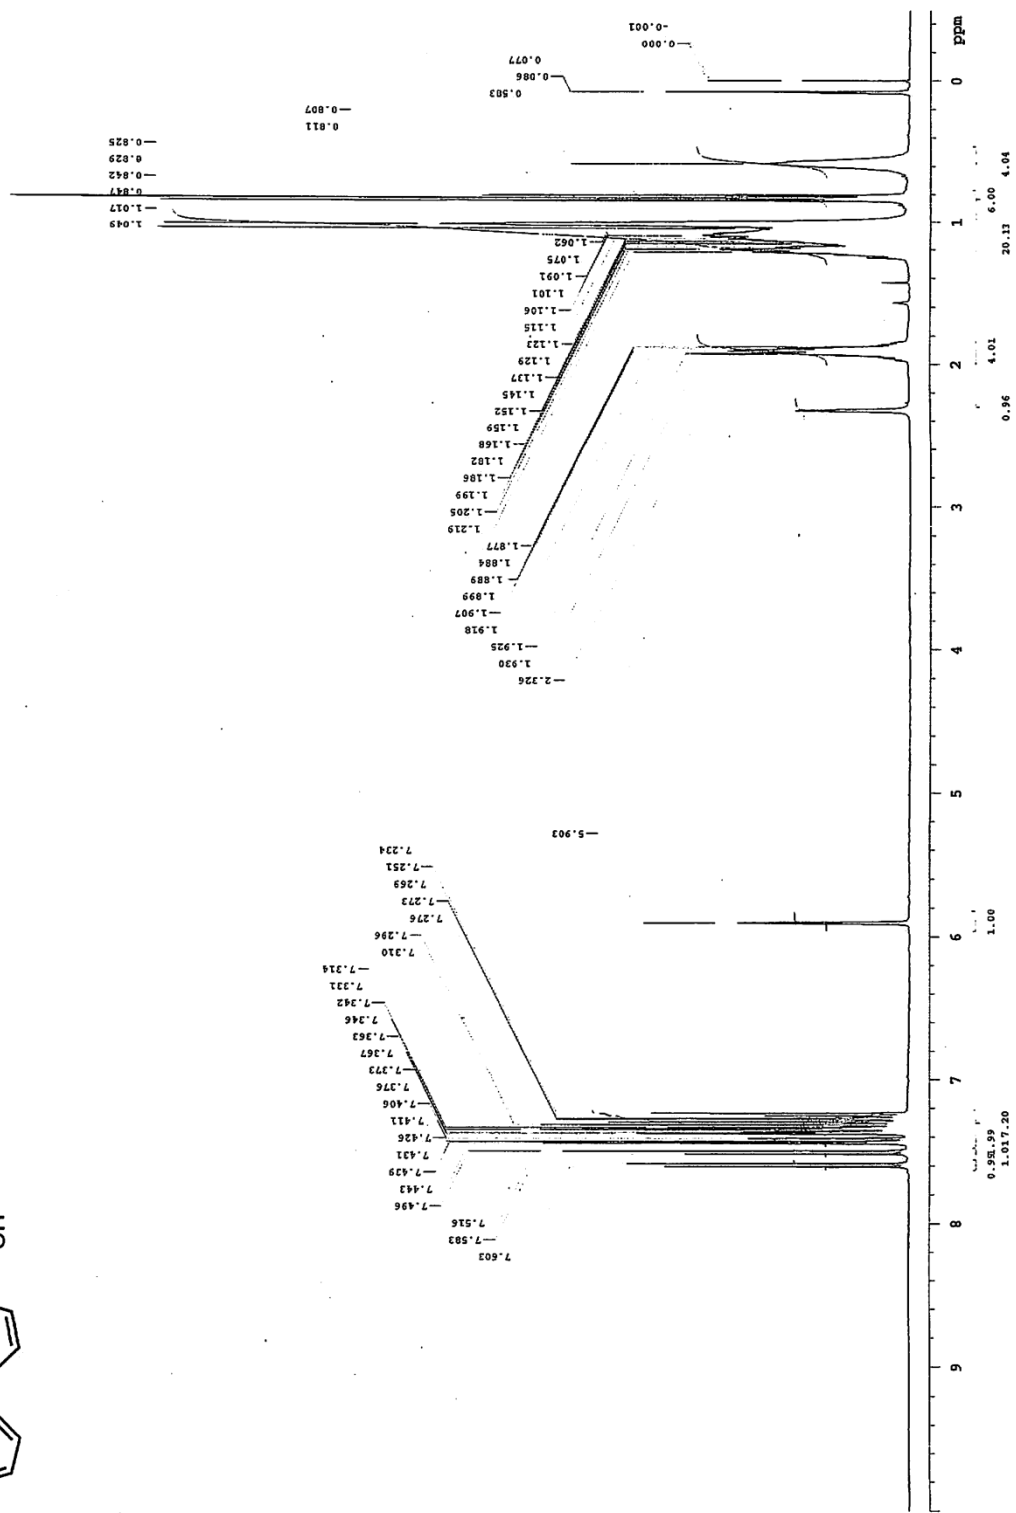

<sup>1</sup>H NMR spectrum of 2-bromo-7-[hydroxyl(phenyl)methyl]-9,9-dioctylfluorene (34)



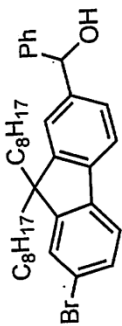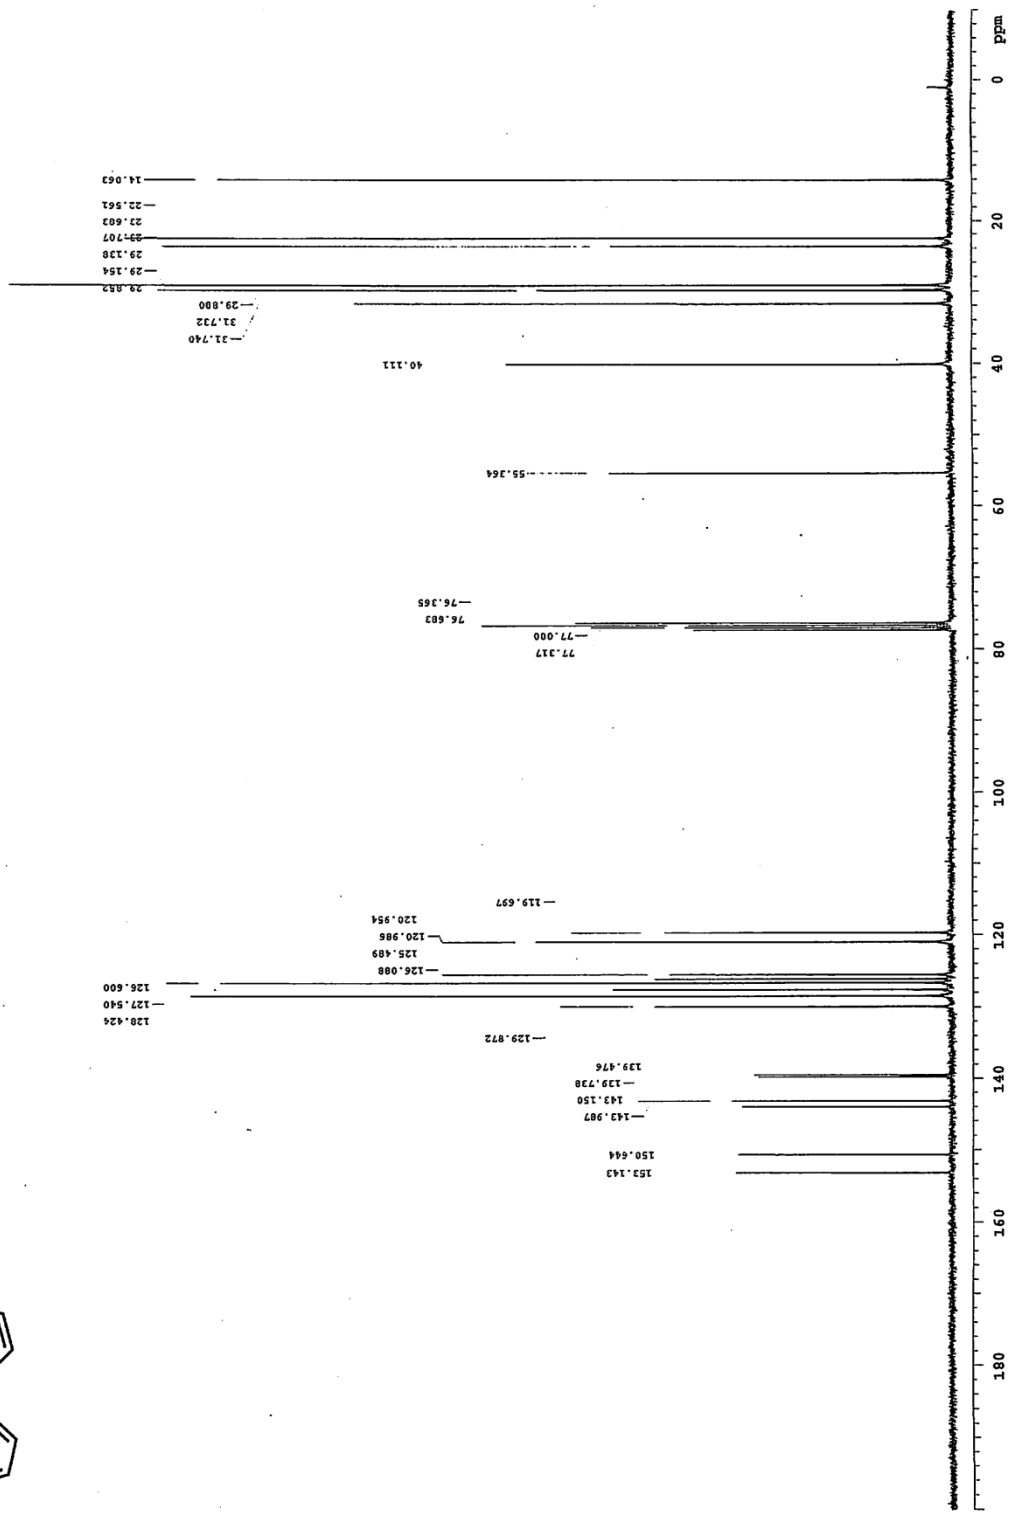

<sup>13</sup>C NMR spectrum of 2-bromo-7-[hydroxyl(phenyl)methyl]-9,9-dioctylfluorene (34)

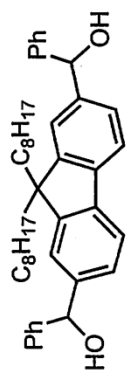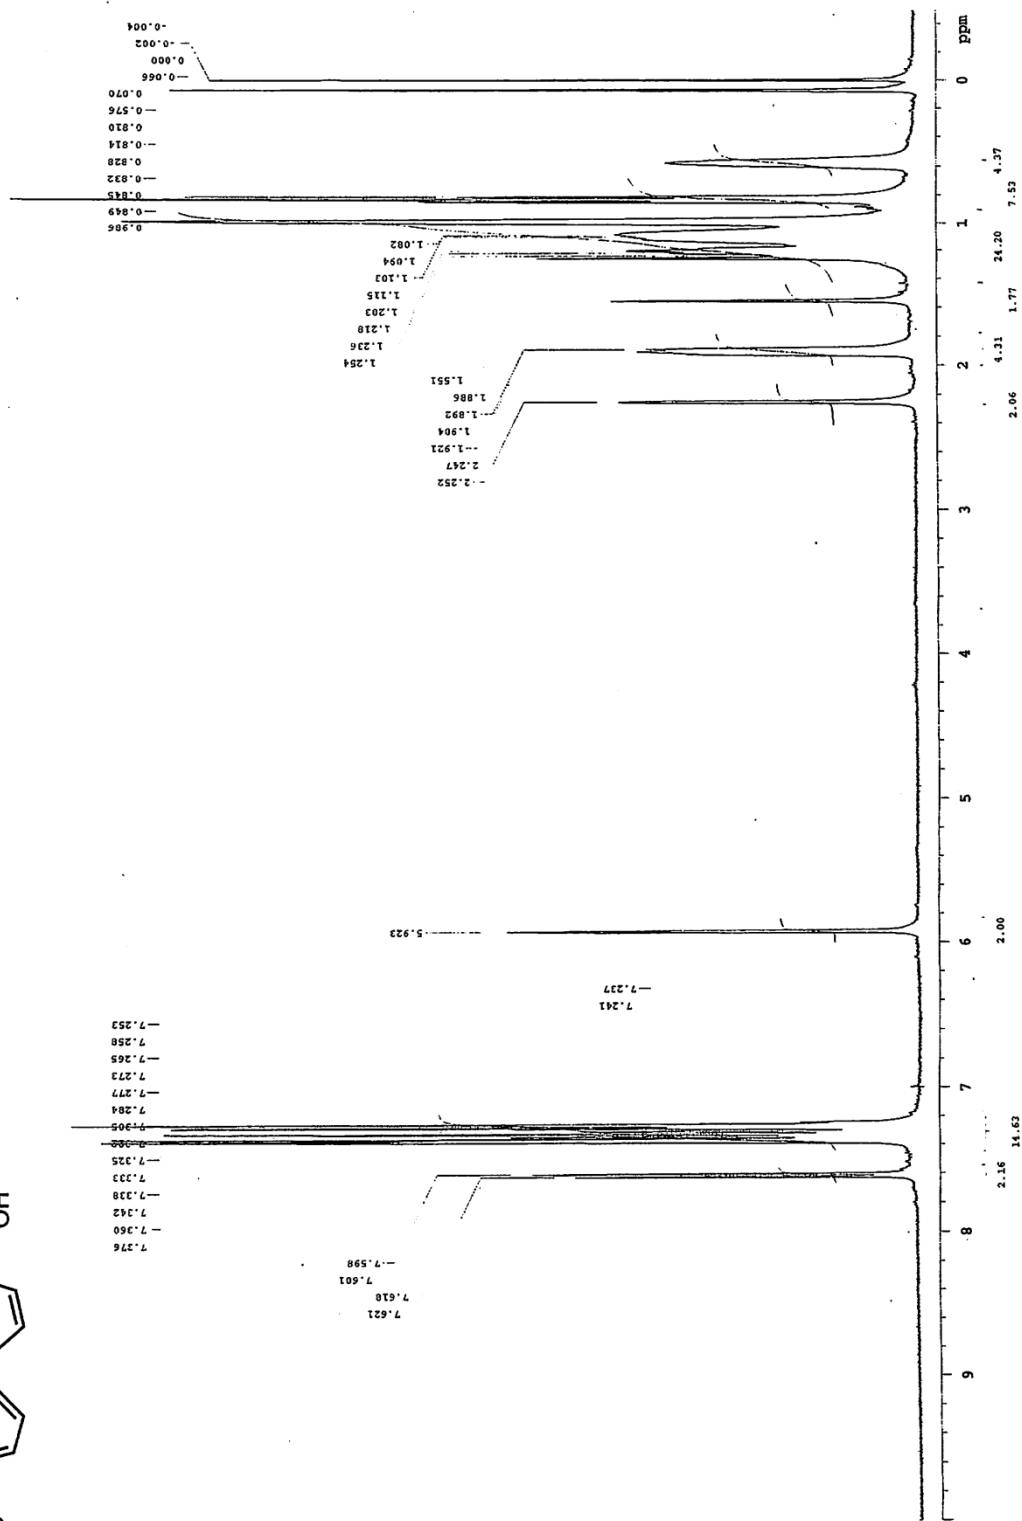

<sup>1</sup>H NMR spectrum of 2,7'-di[hydroxyl(phenyl)methyl]-9,9-dioctylfluorene (35)

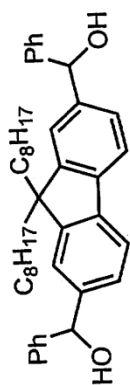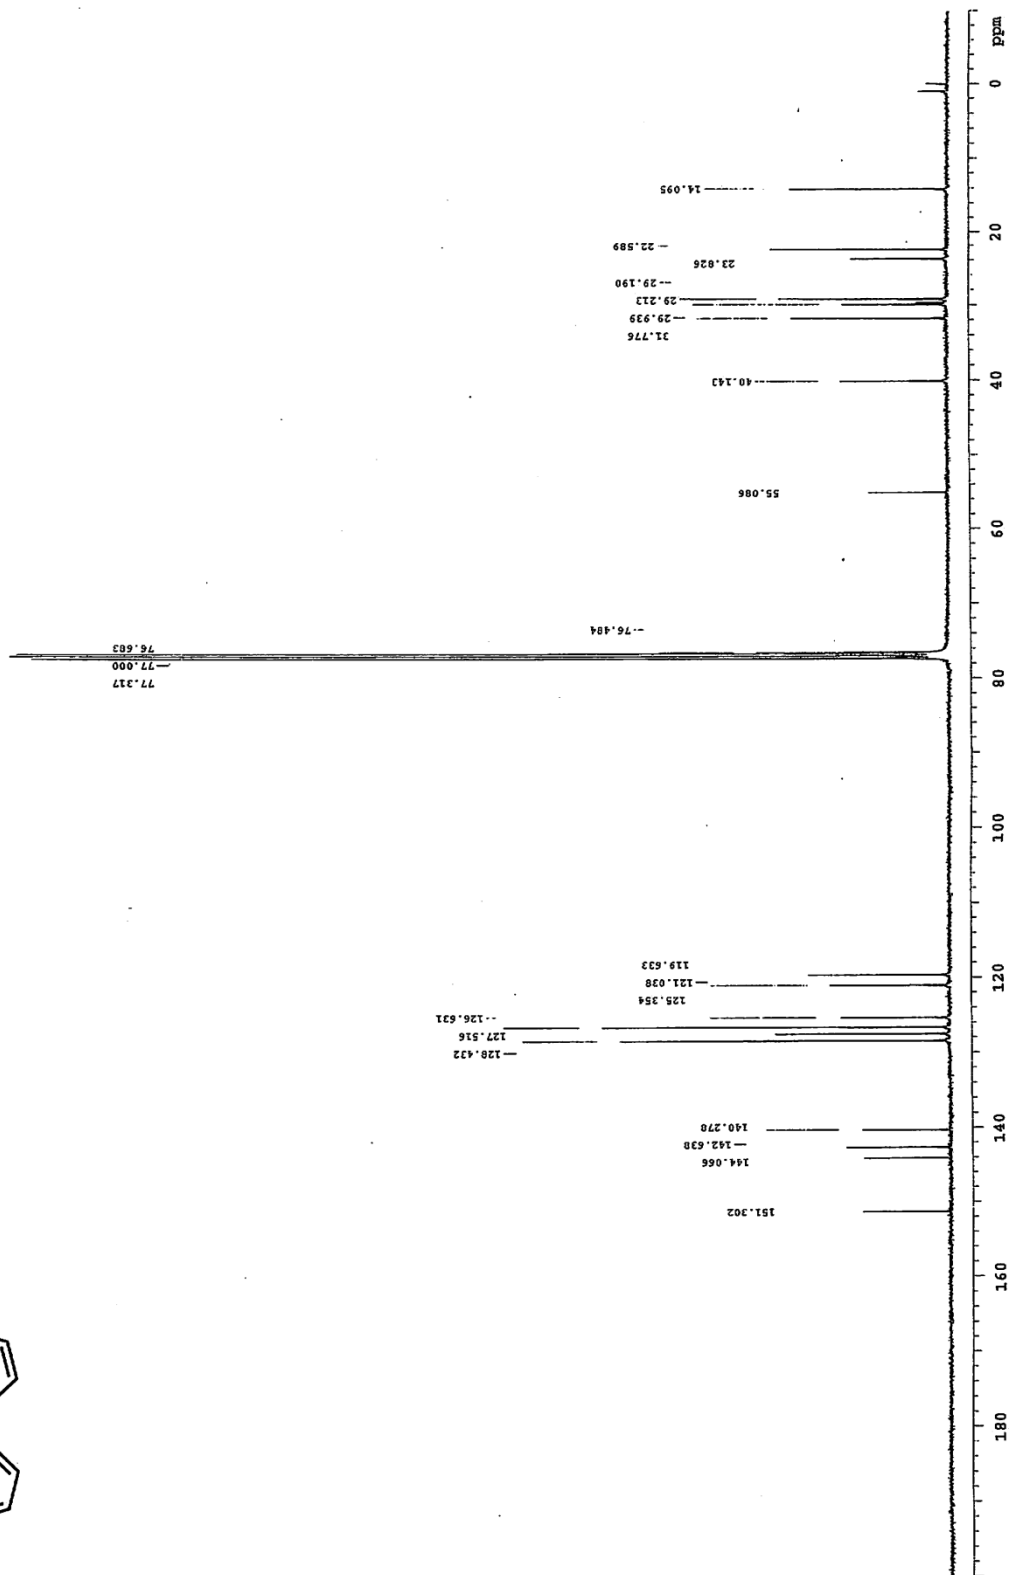

$^{13}\text{C}$  NMR spectrum of 2,7'-di[hydroxyl(phenyl)methyl]-9,9-dioctylfluorene (35)

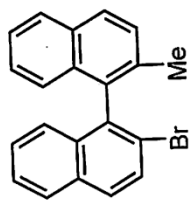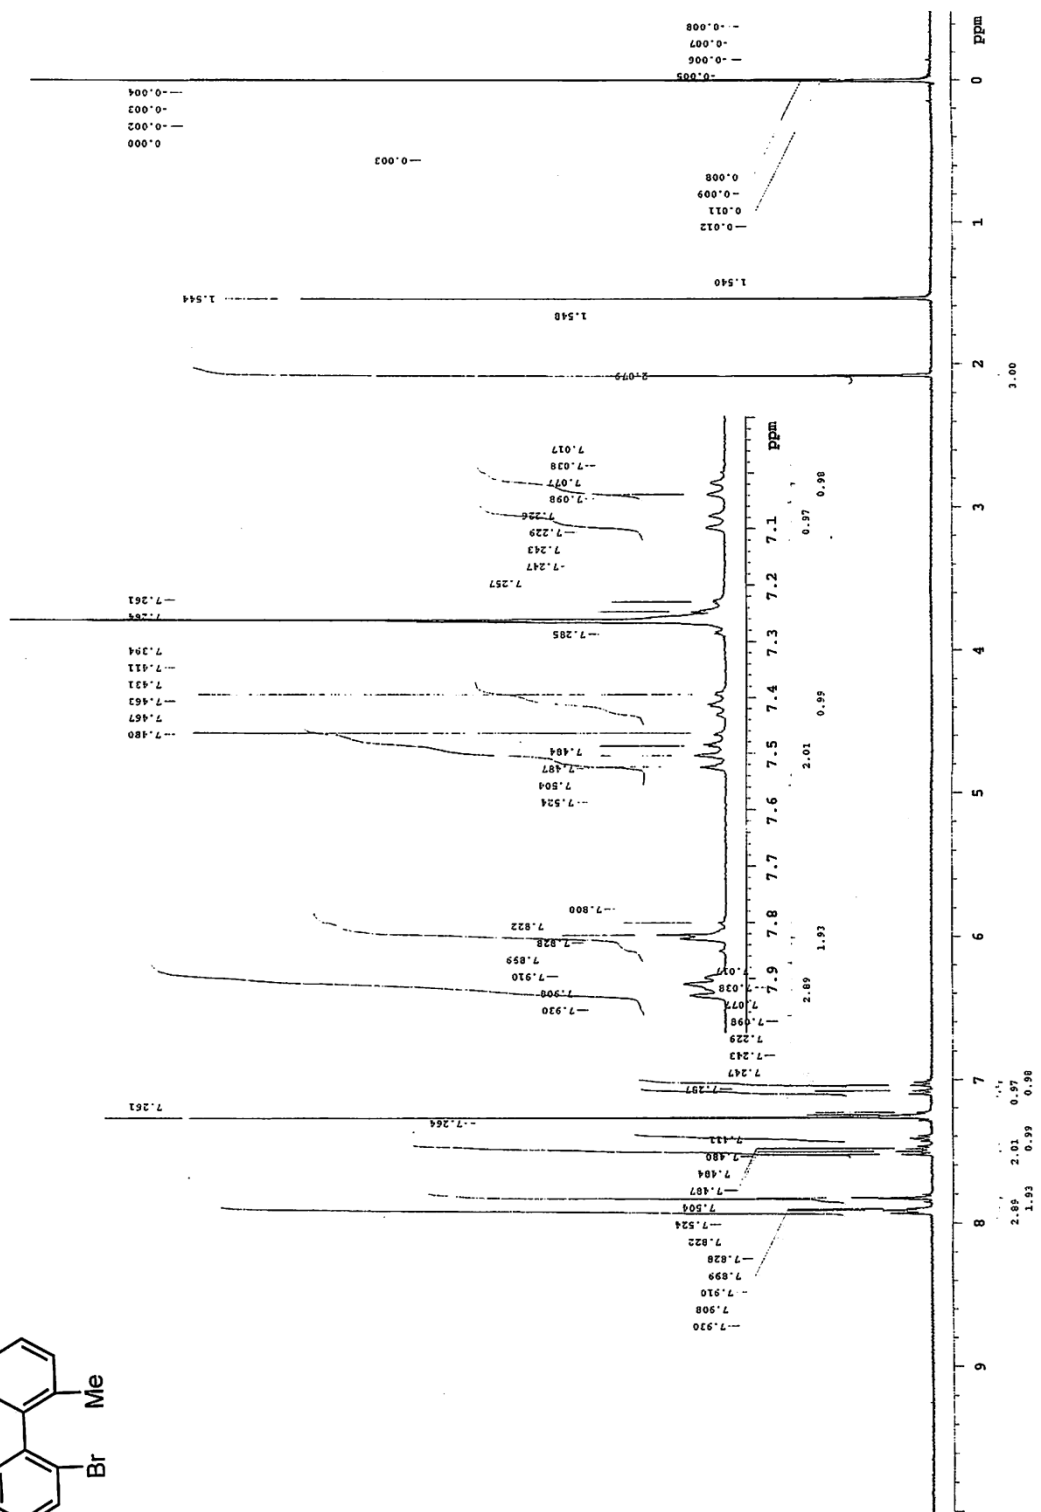

**<sup>1</sup>H NMR spectrum of 2-bromo-2'-methyl-1,1'-binaphthyl (39)**

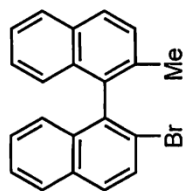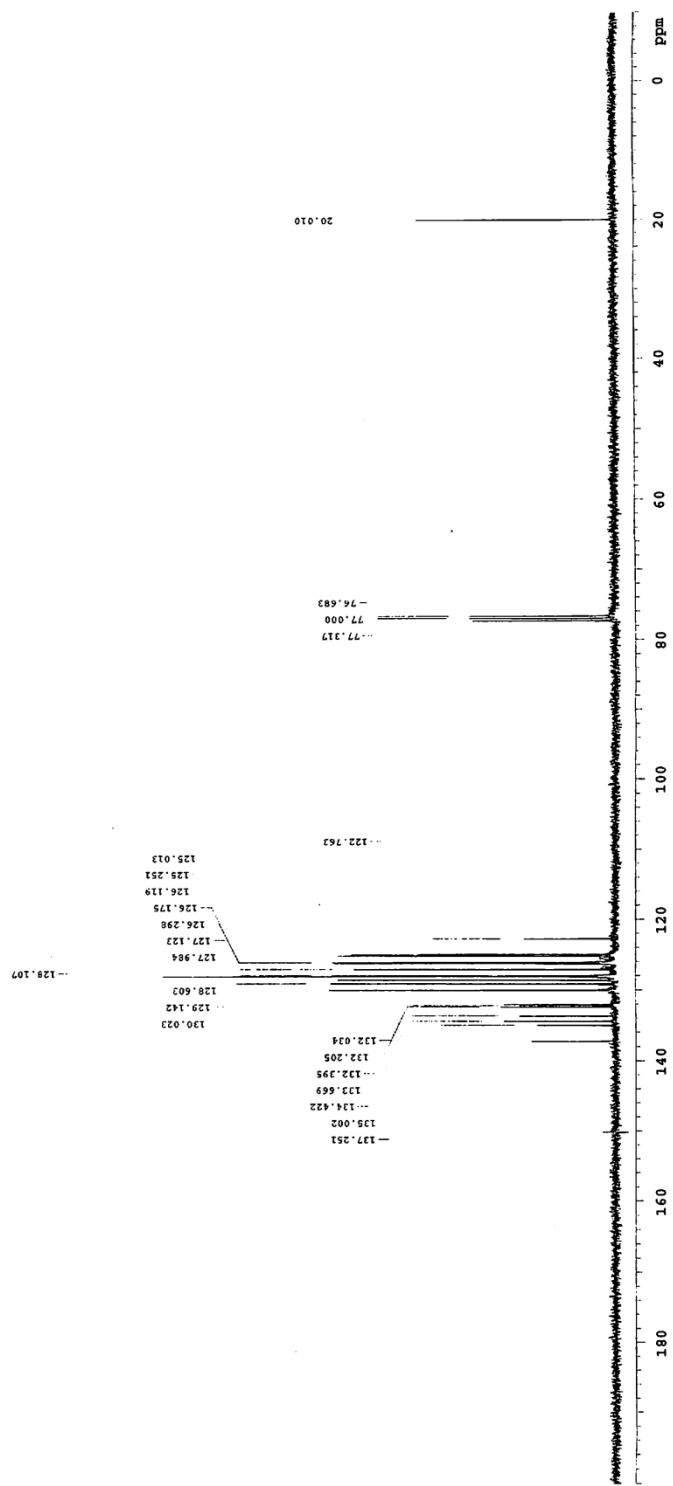

$^{13}\text{C}$  NMR spectrum of 2-bromo-2'-methyl-1,1'-binaphthyl (39)
